# Supplementary material for: S100A6 Promotes B Lymphocyte Penetration Through the Blood–Brain Barrier in Autoimmune Encephalitis
Source: Front Genet. 2019 Nov 22;10:1188. doi: 10.3389/fgene.2019.01188 (PMC6901080; doi:10.3389/fgene.2019.01188)
Supplement: Supplementary Table 2 — The details of CpG dinucleotides. The "?" sign denoted missing value. Such result could be the result of low-quality probe set signal.Such missing value were replaced with the mean of the same category. For example, cg00043673 has a missing value AE5-Beta, the remaining four AE sample have an average beta value of 0.2276. As a result, AE5-Beta is assigned as 0.2276. [file Table_2.xls]

## Sheet: Sheet1
### The "?" sign denoted missing value. Such result could be the result of low-quality probe set signal.Such missing value were replaced with the mean of the same category. For example, cg00043673 has a missing value AE5-Beta, the remaining four AE sample have a average beta value of 0.2276. As a result, AE5-Beta is assigned as 0.2276.
CpG	p-value	Fold-Change (Patient vs. Control)	AE1-Beta	AE2-Beta	AE3-Beta	AE4-Beta	AE5-Beta	HC1-Beta	HC2-Beta	HC3-Beta	chr	coordinate
cg00000165	0.00509812	-1.24634	0.16802	0.170331	0.170936	0.185452	0.170936	0.205914	0.204251	0.236317	1	91194674
cg00003784	0.000991171	-1.24982	0.0417406	0.0471217	0.0464814	0.0475667	0.0467519	0.0554807	0.0594849	0.0574587	17	62503072
cg00006032	0.00619284	-1.16132	0.0897465	0.0973013	0.102262	0.102106	0.0913382	0.114091	0.112824	0.110135	14	66974439
cg00007032	0.00689325	-1.19286	0.0854707	0.0854928	0.0771742	0.0825304	0.075715	0.102559	0.089946	0.0976394	13	30002629
cg00007644	0.00679111	-1.32462	0.123158	0.130758	0.114732	0.128801	0.122008	0.176971	0.14176	0.172767	11	20623259
cg00010583	0.00345979	-1.20323	0.523104	0.521473	0.540874	0.481108	0.550482	0.630349	0.602329	0.654919	19	48467054
cg00011203	0.00155534	-1.26111	0.180364	0.187985	0.176138	0.192067	0.162607	0.223379	0.217087	0.238537	1	9259066
cg00014561	0.00702305	-1.16177	0.37089	0.34147	0.390683	0.371205	0.343104	0.422459	0.421633	0.423803	16	56762906
cg00016255	0.00709333	-1.11078	0.499444	0.531176	0.526191	0.533835	0.522071	0.560739	0.606188	0.576094	17	41133928
cg00021325	0.00893814	-1.23173	0.177732	0.166057	0.192135	0.173146	0.164998	0.22826	0.199964	0.217971	14	91294412
cg00022264	0.00778323	-1.13716	0.681137	0.641119	0.707906	0.679515	0.66963	0.734321	0.773826	0.797585	5	52662008
cg00024049	0.000733067	-1.23339	0.462591	0.463459	0.468744	0.444617	0.48315	0.551688	0.601536	0.566244	21	34960006
cg00025328	0.00162327	-1.11309	0.664745	0.699404	0.698379	0.672137	0.664487	0.765842	0.759685	0.74524	11	66405055
cg00029353	0.0065799	-1.39168	0.0376168	0.033064	0.0309506	0.0413492	0.0401704	0.0479315	0.053874	0.0512311	12	52241041
cg00031823	0.000765208	-1.10294	0.707576	0.718867	0.696187	0.720304	0.697884	0.76094	0.77146	0.807389	9	138915692
cg00037035	0.000213738	-1.14923	0.585834	0.569502	0.595046	0.583513	0.563613	0.668088	0.676431	0.654696	13	19115003
cg00037681	0.007441	-1.41416	0.0436985	0.0581909	0.0610963	0.0650857	0.0653495	0.0904661	0.0762195	0.0829213	12	47610371
cg00043673	0.00406493	-1.23967	0.22415	0.234205	0.221342	0.230625	?	0.260209	0.279445	0.299775	18	46002113
cg00043800	0.00995872	-1.10766	0.557246	0.56757	0.533827	0.566656	0.542404	0.611153	0.574222	0.649057	2	74612144
cg00044968	0.00308168	-1.46392	0.03125	0.0445273	0.0340645	0.0364248	0.0365036	0.0535455	0.0511527	0.0556793	11	116644101
cg00048842	0.00944458	-1.12402	0.692045	0.691489	0.678522	0.682669	0.63264	0.719239	0.78744	0.767398	12	72473584
cg00049883	0.00382831	-1.24611	0.339781	0.351617	0.365563	0.363339	0.349111	0.419506	0.419122	0.482561	16	5554273
cg00054706	0.006961	-1.27387	0.0531039	0.0660944	0.0717051	0.0718692	0.0622601	0.0876479	0.0858144	0.0760983	2	68289972
cg00055341	0.00674673	-1.24417	0.331785	0.331928	0.322946	0.318557	0.327042	0.396106	0.358224	0.459681	2	200446845
cg00055486	0.00623623	-1.23072	0.506316	0.545536	0.531227	0.554422	0.495818	0.61298	0.701547	0.63131	2	236411200
cg00055595	0.000302556	-1.1411	0.100703	0.107454	0.10033	0.101661	0.101046	0.116173	0.115912	0.117514	2	171674553
cg00057569	0.000444232	-1.53534	0.0716779	0.075227	0.075262	0.0661463	0.0785022	0.11043	0.103948	0.123303	10	95462548
cg00059874	0.000590188	-1.14987	0.504946	0.527897	0.474993	0.467867	0.474974	0.537464	0.5675	0.579921	9	69146590
cg00061436	0.000582107	-1.11065	0.654527	0.646079	0.630244	0.651703	0.647645	0.696141	0.712462	0.741014	14	93761248
cg00061629	0.00374643	-1.47967	0.122566	0.102388	0.103201	0.114256	0.080922	0.160385	0.144975	0.158668	11	44325258
cg00065446	0.00397579	-1.26648	0.0691368	0.0794442	0.073089	0.0763755	0.0689622	0.0971766	0.0862924	0.0951552	20	40298353
cg00065598	0.000621423	-1.31932	0.126868	0.130317	0.130115	0.123661	0.136214	?	0.168053	0.173652	6	35309996
cg00067126	0.00300894	-1.34004	0.0612655	0.0728675	0.0714127	0.0774157	0.0812414	0.0974473	0.095534	0.100318	2	122493570
cg00067696	0.00263481	-1.17719	0.574823	0.56509	0.567025	0.611411	0.546034	0.692948	0.652543	0.677856	16	1973465
cg00074145	0.0066684	-1.52645	0.170368	0.215349	0.225703	0.202711	0.153768	0.321072	0.273016	0.29248	15	53075505
cg00074348	0.00641478	-1.17079	0.457924	0.469265	0.482701	0.458291	0.499305	0.564199	0.520679	0.577909	11	57006273
cg00075507	0.000660244	-1.11923	0.606066	0.610875	0.579052	0.577625	0.569993	0.662844	0.624307	0.683765	17	26708226
cg00077183	0.00875812	-1.13815	0.525819	0.560207	0.563389	0.55127	0.546117	0.586251	0.639824	0.64874	12	69462328
cg00078676	0.00806142	-1.13222	0.554329	0.601695	0.562	0.567987	0.616294	0.650535	0.65435	0.66636	2	120949686
cg00080059	0.000577279	-1.42058	0.071372	0.0655888	0.0695067	0.0678168	0.0770267	0.0935412	0.104074	0.101884	20	61568856
cg00081439	0.00232458	-1.19348	0.466287	0.493243	0.496415	0.438701	0.446136	0.555823	0.546447	0.571149	10	743761
cg00083848	0.00700776	-1.23539	0.0751227	0.0879716	0.0848117	0.0872372	0.0843343	0.0976763	0.102481	0.110611	19	6394140
cg00087355	0.0018517	-1.10578	0.68122	0.669586	0.642302	0.679309	0.678443	0.725921	0.729322	0.764771	2	239216996
cg00089566	0.00217668	-1.19295	0.360933	0.384506	0.388279	0.366497	0.364453	0.435192	0.425006	0.472359	17	72858108
cg00089798	0.00119253	-1.77914	0.0380278	0.0404971	0.0504035	0.0385039	0.0370139	0.0763254	0.0646552	0.0772853	12	62585204
cg00092123	0.00512982	-1.11848	0.609803	0.63066	0.602583	0.624922	0.566819	0.673745	0.65686	0.701533	2	99415612
cg00098029	0.0032475	-1.12577	0.468575	0.50508	0.480305	0.484228	0.498035	0.535728	0.539931	0.568234	4	187984506
cg00098622	0.00603301	-1.18611	0.41775	0.398859	0.412012	0.450964	0.409972	0.469579	0.500196	0.517117	5	175965617
cg00103778	0.00685562	-1.21055	0.252678	0.284563	0.28711	0.273441	0.28297	0.317648	0.327316	0.357327	20	30196041
cg00107603	0.00757166	-1.25434	0.0474564	0.0526129	0.0412135	0.0484694	0.0442817	0.0576563	0.0516097	0.0659418	19	19516022
cg00107682	0.00293721	-1.19909	0.0866498	0.0920155	0.0805501	0.0925407	0.0864297	0.104402	0.100974	0.109294	15	96888959
cg00110623	0.004772	-1.13398	0.105669	0.115976	0.105496	0.107726	0.112265	0.124443	0.120477	0.126851	5	150461116
cg00113033	0.000768628	-1.10536	0.745622	0.786806	0.7609	0.775761	0.763462	0.856827	0.838032	0.847035	21	44603383
cg00114478	0.00349293	-1.20576	0.259583	0.274576	0.247968	0.269384	0.283917	0.308304	0.320043	0.336664	8	73658110
cg00122254	0.00728206	-1.27725	0.0822752	0.0838119	0.0865306	0.0834678	0.0724446	0.113803	0.102402	0.0971605	1	46769320
cg00125205	0.00321308	-1.18863	0.575865	0.516167	0.564605	0.568048	0.536241	0.641466	0.641424	0.68487	4	36282463
cg00130530	0.000981533	-1.1304	0.630176	0.626033	0.625475	0.650153	0.657122	0.731642	0.702281	0.729884	6	35657202
cg00137634	0.000637668	-1.49376	0.0436659	0.0522234	0.0592605	0.0604915	0.0582771	0.0787909	0.0907435	0.0764992	6	26055783
cg00138474	0.00924127	-1.68983	0.0575884	0.0591918	0.0582543	0.0550908	0.049686	0.0700665	0.0912801	0.122475	6	30484334
cg00138641	0.00965101	-1.25472	0.057031	0.0679815	0.0611527	0.0649408	0.0649662	0.0720004	0.0824394	0.0833333	16	14397074
cg00141498	0.00737683	-1.18962	0.519781	0.470048	0.507691	0.450119	0.477071	0.577111	0.538295	0.61103	8	130691356
cg00145253	0.000774492	-1.12579	0.25965	0.249654	0.244078	0.235269	0.244642	0.276637	0.265628	0.288403	1	75602857
cg00146837	0.00555915	-1.32316	0.0549743	0.0752748	0.078592	0.0777086	0.0803478	0.0984946	0.105358	0.0888196	17	60142491
cg00152259	0.000417986	-1.16207	0.303199	0.294238	0.295567	0.297445	0.297161	0.332421	0.340896	0.362328	17	34957477
cg00155622	0.00796943	-1.57068	0.0526431	0.0496894	?	0.0484293	0.0595675	0.093662	0.0745685	0.0810099	15	41710064
cg00162282	0.00340454	-1.10415	0.543048	0.526388	0.554759	0.54374	0.540684	0.58236	0.592694	0.618764	16	88579739
cg00163702	0.00398049	-1.14223	0.54138	0.560583	0.493938	0.537274	0.5414	0.609699	0.579375	0.638726	16	81254719
cg00165394	0.0088092	-1.10366	0.522002	0.535092	0.519153	0.540353	0.509082	0.550246	0.576594	0.608543	15	42187649
cg00167273	0.00439174	-1.54995	0.0335938	0.0492833	0.0502276	0.0522638	0.0407142	0.0694751	0.0688662	0.0720143	15	42841178
cg00167958	0.000165314	-1.10266	0.600029	0.606362	0.61113	0.596313	0.607294	0.654116	0.672833	0.671522	22	42677969
cg00170620	0.008186	-1.21912	0.209215	0.223426	0.18591	0.215297	0.200167	0.238121	0.229608	0.284809	16	56669038
cg00171192	0.0043322	-1.13476	0.444444	0.422335	0.429659	0.455724	0.426309	0.492301	0.476851	0.512855	22	17518345
cg00172672	0.00281279	-1.16195	0.185825	0.173312	0.176074	0.172897	0.162258	0.201568	0.191401	0.212088	20	34895136
cg00174275	0.00442554	-1.40555	0.187509	0.26589	0.319922	0.275154	0.297584	0.416505	0.392275	0.331984	8	143210411
cg00177175	0.00653015	-1.11118	0.657275	0.678813	0.730759	0.698564	0.7151	0.766918	0.76796	0.789313	6	58386160
cg00177797	0.00444402	-1.18679	0.128516	0.12953	0.124414	0.120494	0.131421	0.154065	0.138228	0.158463	1	180203837
cg00178149	0.00872874	-1.2936	0.0562	0.0640023	0.068055	0.0784406	0.0734155	0.0952158	0.0830713	0.0867407	3	39093426
cg00179906	0.00713842	-1.12731	0.650956	0.673516	0.665723	0.667505	0.605599	0.718536	0.713461	0.770452	17	14208363
cg00179940	0.00286554	-1.12495	0.631118	0.691128	0.624646	0.630708	0.624763	0.713259	0.694122	0.747948	12	126978053
cg00185839	0.00963519	-1.26697	0.048877	0.0574621	0.0613612	0.0508031	0.0508696	0.0704069	0.0671545	0.0673618	11	804954
cg00187933	0.00241288	-1.31875	0.0997182	0.090289	0.084741	0.103089	0.0968119	0.124029	0.119486	0.131674	4	996785
cg00188488	0.00277942	-1.30526	0.284334	0.281331	0.277447	0.264057	0.234662	0.350651	0.310986	0.385426	22	43318660
cg00188746	0.00211972	-1.61521	0.0571616	0.0515578	0.0411123	0.0534669	0.0495856	0.0677709	0.0836844	0.0934613	1	15480258
cg00189457	0.0051722	-1.37309	0.0377767	0.0399209	0.044154	?	0.0357961	0.0551615	0.0517368	0.0553978	11	10326728
cg00193867	0.00826405	-1.19588	0.578622	0.627457	0.654215	0.668061	0.673839	0.717142	0.81497	0.770964	4	6437362
cg00193963	0.00716225	-1.59679	0.0772288	0.0760265	0.0888045	0.112418	0.0938377	0.128161	0.140669	0.160783	7	29923832
cg00194146	0.0068409	-1.19819	0.216789	0.193455	0.169938	0.180119	0.190776	0.215815	0.23102	0.234123	6	13488404
cg00195749	0.00128398	-1.14434	0.423497	0.415784	0.423816	0.410085	0.410507	0.48177	0.452357	0.494521	17	77764418
cg00199059	0.00842171	-1.1088	0.464867	0.499492	0.50949	0.501178	0.503708	0.551474	0.535604	0.563225	20	45317219
cg00202496	0.000839631	-1.14284	0.628239	0.609759	0.622222	0.592412	0.618456	0.675725	0.699438	0.727639	16	11037903
cg00204512	0.00662015	-1.18638	0.382985	0.336821	0.353798	0.33321	0.319809	0.41334	0.388223	0.424044	16	28754710
cg00206487	0.00317808	-1.11794	0.732512	0.686522	0.674387	0.668883	0.663598	0.777811	0.733926	0.780494	8	28228641
cg00207125	0.00410509	-1.17717	0.26349	0.255867	0.255227	0.254027	0.259879	0.303928	0.278445	0.325571	4	15398071
cg00207731	0.00316737	-1.15228	0.46612	0.506863	0.510774	0.471302	0.491493	0.552338	0.570999	0.568229	15	91416118
cg00209129	0.00297387	-1.24706	0.523662	0.537223	0.532925	0.454379	0.450826	0.625606	0.597099	0.641658	8	134261913
cg00210994	0.00879555	-1.38895	0.0358132	0.0456775	0.0528218	0.0589812	0.0484115	0.0704211	0.0647151	0.0669886	3	99594893
cg00216961	0.00109323	-1.26174	0.0794662	0.0795916	0.075	0.0692713	0.0819362	0.0959227	0.0972717	0.0980825	12	6054731
cg00217306	0.00721985	-1.27226	0.290219	0.23987	0.27047	0.282015	0.23636	0.341949	0.325901	0.338607	3	141681567
cg00219578	0.00552224	-1.21178	0.0519576	0.0617738	0.0574898	0.0630487	0.0594444	0.0734728	0.0721695	0.0683976	15	56657280
cg00224335	0.0072246	-1.13953	0.516627	0.552076	0.558151	0.548184	0.547551	0.586118	0.637792	0.637833	21	31747827
cg00231192	0.00842483	-1.16269	0.572956	0.58173	0.62296	0.572606	0.648724	0.701114	0.678171	0.715101	4	165900224
cg00233198	0.00442389	-1.34562	0.116119	0.141484	0.124028	0.132576	0.130361	0.17261	0.190599	0.158021	13	24844684
cg00237164	0.00349977	-1.69631	0.133598	0.1247	0.0996055	?	0.0797654	0.165107	0.192271	0.186115	X	114684782
cg00237191	0.00712657	-1.10432	0.585616	0.608786	0.634914	0.60557	0.600313	0.665804	0.654883	0.690379	19	11574425
cg00238123	0.00489705	-1.13633	0.575637	0.605987	0.594308	0.601477	0.629416	0.657545	0.685766	0.706545	2	10613977
cg00238470	6.70488e-05	-1.10639	0.633275	0.647403	0.622569	0.613849	0.619318	0.684771	0.675411	0.717288	1	36616845
cg00240653	0.00613486	-1.56382	0.0483981	0.0613327	0.0667461	0.0725995	0.0776213	0.0907516	0.107151	0.108872	12	55378411
cg00243574	0.00239381	-1.23886	0.119281	0.135826	0.132761	0.144805	0.137538	0.16675	0.163886	0.168298	12	54410727
cg00244882	0.00871025	-1.41094	0.106337	0.0918285	0.122304	0.12783	0.091432	0.161127	0.146532	0.150089	10	7708290
cg00244983	0.00830636	-1.20596	0.0995192	0.0859706	0.0954801	0.0950016	0.0911371	0.11758	0.104975	0.115333	10	123872936
cg00247269	0.00243306	-1.2634	0.382243	0.431978	0.428008	0.401926	0.374112	0.517021	0.485503	0.525892	16	57480410
cg00247631	0.00260415	-1.17758	0.466607	0.474168	0.456843	0.477373	0.484877	0.569237	0.520476	0.576253	6	35479350
cg00251519	0.00190573	-1.36984	0.0927507	?	0.0956881	0.0941665	0.0879798	0.122827	0.135694	0.119936	2	97481232
cg00253403	0.00316602	-1.41943	0.104957	0.116184	0.113881	0.0980442	0.0997545	0.130183	0.157103	0.165595	4	71553554
cg00255882	0.0017129	-1.6934	0.281883	0.220594	0.326291	0.254183	0.224846	0.469487	0.429424	0.42972	2	128569347
cg00256374	0.00196757	-1.13684	0.0823717	0.0823982	0.0784792	0.0803546	0.0814323	0.0929416	0.0949767	0.0884367	19	1383699
cg00257474	0.00217559	-1.36724	0.0514066	0.0567951	0.0435971	0.0518692	0.0562459	0.0676993	0.0696015	0.0754939	19	56652107
cg00258945	0.00386211	-1.52247	0.0492495	0.0655764	0.0626936	0.0606241	0.0659026	0.0825835	0.102591	0.0927212	5	109180462
cg00259070	0.00689192	-1.12546	0.598601	0.551824	0.541166	0.550649	0.528807	0.638236	0.602105	0.626846	15	75335123
cg00260914	0.00560186	-1.33959	0.077387	0.0666313	0.0645969	0.0659166	0.0603512	0.0877905	0.075759	0.104295	17	79875458
cg00261416	0.000113153	-1.5925	0.078641	0.0833708	0.0658915	0.0702437	0.0751386	0.123225	0.10899	0.124244	5	39425545
cg00267512	0.00579935	-1.11564	0.326769	0.32849	0.32432	0.303812	0.305129	0.348951	0.332044	0.378344	10	127584250
cg00269800	0.000931089	-1.78637	0.114319	0.117308	0.17503	0.199165	0.132343	0.271666	0.280619	0.237173	5	140563151
cg00274428	0.00924001	-1.24354	0.686072	0.550767	0.534329	0.558705	0.537964	0.719254	0.678883	0.733948	1	236066569
cg00276797	0.0080526	-1.21011	0.0517988	0.0604794	0.0513891	0.0555834	0.0560391	0.0659407	0.0622189	0.0712114	10	105726614
cg00277331	0.00227902	-1.10249	0.624979	0.61022	0.598571	0.563549	0.586961	0.651225	0.628463	0.68773	7	128853964
cg00279814	0.00408077	-1.12797	0.663198	0.621389	0.690968	0.696957	0.68502	0.74452	0.765495	0.76669	5	158758077
cg00280814	0.00792528	-1.12293	0.51582	0.544771	0.500147	0.532488	0.526054	0.560792	0.572047	0.627253	22	23745389
cg00281725	0.00191346	-1.14362	0.707589	0.703701	0.697688	0.663914	0.693579	0.746423	0.787763	0.838336	8	833048
cg00282706	0.00284161	-1.42031	0.0715382	0.0615922	0.0601628	0.067237	0.0686864	0.0827495	0.0926553	0.104645	12	6055430
cg00283283	0.00908046	-1.17558	0.411615	0.441752	0.42774	0.40062	0.435608	0.467719	0.477179	0.544275	5	140891767
cg00286853	0.00362389	-1.17611	0.0540194	0.0563572	0.0583472	0.0604925	0.055405	0.071303	0.0651116	0.064881	16	86528753
cg00287601	0.00619518	-1.24548	0.338099	0.379217	0.347656	0.357699	0.375837	0.407273	0.450235	0.484137	4	190895414
cg00291896	0.00250676	-1.31138	0.467368	0.532028	0.496774	0.498162	0.483871	0.602041	0.700342	0.64723	7	7256440
cg00293757	0.00357837	-1.12777	0.583657	0.604086	0.567518	0.607941	0.587222	0.63677	0.661206	0.695148	14	20930380
cg00295547	0.00217626	-1.17458	0.502886	0.477083	0.484694	0.496243	0.469935	0.546365	0.551641	0.611236	5	146270627
cg00298025	0.00606266	-1.49136	0.125084	0.178112	0.135121	0.123921	0.129288	0.179664	0.190811	0.246415	20	49604516
cg00300969	0.00687671	-1.11806	0.4392	0.48235	0.426931	0.448698	0.425611	0.481866	0.492877	0.512072	20	31366486
cg00301203	0.00389855	-1.13583	0.414521	0.43357	0.437591	0.437417	0.41513	0.473114	0.474128	0.50858	11	118991566
cg00303157	0.00656034	-1.15245	0.53966	0.555562	0.542052	0.585396	0.513353	0.620388	0.649236	0.622854	7	1753599
cg00306421	0.00764133	-1.22228	0.0818175	0.0976401	0.104098	0.10026	0.0923988	0.1174	0.124003	0.109173	18	21033656
cg00310257	0.00685578	-1.27254	0.0558422	0.071946	0.0623609	0.0629644	0.0663953	0.0828813	0.0795938	0.0814685	3	53148141
cg00313857	0.00488611	-1.25975	0.0760631	0.0614925	0.0709929	0.0716594	0.0698098	0.0844595	0.0904455	0.0897172	15	69707390
cg00319034	0.00519246	-1.1053	0.629188	0.591997	0.614976	0.649776	0.610647	0.700408	0.691157	0.665421	6	162670883
cg00320243	0.00401253	-1.27008	0.0662296	0.0715686	0.079323	0.070596	0.0807618	0.0908137	0.0937317	0.0966779	19	18314691
cg00323266	0.00986474	-1.17671	0.0406982	0.048279	0.0449546	0.0455406	0.0485629	0.054485	0.0537291	0.0530185	2	26256363
cg00324257	0.0009169	-1.13413	0.522194	0.540732	0.540069	0.549674	0.534292	0.610298	0.591645	0.626062	1	148927865
cg00328729	0.0032801	-1.11018	0.674314	0.698292	0.671748	0.708651	0.65648	0.742259	0.757106	0.769739	11	45231175
cg00331343	0.000876657	-1.20596	0.0972976	0.0961667	0.111875	0.106821	0.110901	0.123905	0.131532	0.124369	3	136581031
cg00334245	0.00224353	-1.1103	0.132528	0.134102	0.136063	0.134718	0.13228	0.152255	0.153729	0.140979	6	30923446
cg00337553	0.00061823	-1.10679	0.592754	0.585921	0.573849	0.541602	0.562664	0.61479	0.621312	0.655532	16	32355981
cg00338002	0.00531213	-1.30174	0.24199	0.250577	0.237873	0.261836	0.230268	0.350966	0.29433	0.309859	1	28198813
cg00338615	0.0081224	-1.19097	0.515268	0.499266	0.508869	0.532991	0.503015	0.576462	0.666096	0.588721	15	80265933
cg00339695	0.0057766	-1.14828	0.642409	0.730079	0.699066	0.72059	0.711055	0.815874	0.791629	0.808239	16	24857497
cg00340102	0.00809702	-1.23592	0.225513	0.231402	0.213178	0.229804	0.230475	0.26161	0.256151	0.317434	20	34129456
cg00340850	0.00955718	-1.13936	0.118465	0.110695	0.105033	0.111047	0.0998933	0.115283	0.120485	0.134986	20	55500523
cg00342298	0.00313394	-1.15412	0.0612072	0.0648132	0.0600144	0.0596575	0.0586755	0.0726292	0.0661585	0.0715109	6	127664943
cg00344083	0.00541971	-1.3888	0.0612921	0.0527941	0.0650671	0.0630079	0.0698338	0.0995716	0.0804614	0.0807027	11	46615781
cg00347056	0.0099161	-1.11232	0.636052	0.702758	0.685009	0.688842	0.692981	0.738368	0.76104	0.774136	8	3254000
cg00347198	0.00593251	-1.29061	0.164466	0.162533	0.153568	0.151815	0.146516	0.170884	0.195513	0.233785	17	74073419
cg00347247	0.00573984	-1.22759	0.0795348	0.074479	0.0774507	0.0728353	0.0853646	0.101541	0.0923794	0.0933879	12	122064376
cg00352360	8.98396e-05	-1.18717	0.104722	0.102982	0.10858	0.112053	0.105142	0.129492	0.129237	0.122083	17	37009309
cg00352780	0.0041466	-1.12846	0.488361	0.471369	0.503568	0.486526	0.492386	0.546413	0.531695	0.574875	20	33544183
cg00355768	0.00709041	-1.14269	0.587799	0.63048	0.562608	0.6062	0.574867	0.6573	0.701194	0.669963	18	4988351
cg00357062	0.00199022	-1.15445	0.443323	0.473707	0.478098	0.481478	0.506036	0.556434	0.544342	0.55246	22	43412041
cg00357528	0.0019703	-1.19918	0.450617	0.47568	0.456667	0.423038	0.479564	0.53037	0.542027	0.569508	19	45968618
cg00360969	0.00107511	-1.10999	0.681684	0.708404	0.688376	0.714765	0.701178	0.760307	0.774552	0.79163	12	113263806
cg00361040	0.00943125	-1.30858	0.343607	0.332392	0.362693	0.37579	0.289514	0.483006	0.446126	0.411129	13	73354967
cg00365989	0.00333832	-1.23182	0.0596949	0.0649317	0.0711111	0.0707257	0.0701242	0.0789277	0.0867793	0.0837213	22	30819400
cg00366103	0.00559811	-1.21186	0.319385	0.30928	0.28376	0.307448	0.326232	0.356162	0.354337	0.410268	7	96645019
cg00366531	0.00430196	-1.15865	0.390084	0.411836	?	0.390495	0.391358	0.433613	0.464707	0.47065	2	130970940
cg00367830	0.00365794	-1.10749	0.617445	?	0.61591	0.615161	0.617029	0.658221	0.693543	0.700196	19	49471637
cg00371891	0.000688312	-1.2024	0.0577132	0.0631106	0.06421	0.0630016	0.0643537	0.0789753	0.0743404	0.0725655	19	4723959
cg00374839	0.00313228	-1.35612	0.0983158	0.0981235	0.088829	0.109988	0.0959588	0.126351	0.126126	0.14654	11	44332454
cg00375157	0.00858892	-1.34283	0.0659358	0.0700809	0.082466	0.0674579	0.0782672	0.0920022	0.111565	0.090761	16	30418874
cg00375799	0.00519124	-1.20339	0.075166	0.0698559	0.0739494	0.0770232	0.0663479	0.0842965	0.0899734	0.0873368	7	137327391
cg00375970	0.00149824	-1.21182	0.491562	0.497915	0.539007	0.523135	0.505198	0.590873	0.628738	0.640367	8	17762550
cg00377320	0.00522062	-1.13001	0.190139	0.19445	0.188343	0.184602	0.171182	0.211974	0.199783	0.216192	17	47988100
cg00380376	0.00368051	-1.1624	0.552628	0.603984	0.565007	0.56927	0.569794	0.633375	0.644527	0.712287	9	17735531
cg00384205	0.00367737	-1.1188	0.503509	0.488108	0.490702	0.463638	0.464849	0.516923	0.550284	0.547871	3	128713392
cg00384910	0.00485421	-1.18982	0.050152	0.051488	0.0522781	0.0508213	0.0583426	0.0660823	0.0632514	0.0590406	19	4639013
cg00386101	0.0031493	-1.11975	0.776035	0.755746	0.799859	0.749455	0.744324	0.847757	0.837352	0.882519	2	11621399
cg00388521	0.00495172	-1.19627	0.0697073	0.0665163	0.0697627	0.0664586	0.0722011	0.0783353	0.0885159	0.0807789	10	94050649
cg00389386	0.00485074	-1.16908	0.58348	0.635657	0.677121	0.686623	0.710581	0.802653	0.754587	0.761713	1	6188136
cg00391884	0.00875785	-1.19612	0.520916	0.495311	0.516602	0.521988	0.525203	0.568025	0.604432	0.675829	10	95294
cg00394028	0.00793989	-1.1034	0.661873	0.671635	0.681006	0.706084	0.667425	0.719274	0.755103	0.768697	18	54813219
cg00394180	0.00890206	-1.2303	0.168727	0.163634	0.132716	0.158592	0.155387	0.189514	0.169657	0.212899	8	97167170
cg00396899	0.00103493	-1.11177	0.716288	0.74585	0.692479	0.709467	0.671806	0.767853	0.780441	0.804314	3	63213796
cg00396991	0.00873555	-1.18961	0.214518	0.200212	0.238402	0.269058	0.251062	0.286866	0.283399	0.272019	1	161494029
cg00398673	0.00202452	-1.19295	0.466439	0.426881	0.420963	0.464328	0.424779	0.520397	0.51794	0.536966	1	33448891
cg00398767	0.0060429	-1.11685	0.677781	0.721389	0.72533	0.773815	0.742886	0.810453	0.818705	0.815831	5	109037023
cg00398872	0.00484878	-1.11661	0.520299	0.517153	0.521705	0.546774	0.516736	0.572418	0.572546	0.610899	9	139615154
cg00402352	0.00939286	-1.12895	0.652482	0.687728	0.684675	0.704208	0.672324	0.725073	0.781833	0.796389	11	134373160
cg00403202	0.00553228	-1.10272	0.659225	0.657402	0.679861	0.659756	0.659635	0.764098	0.705513	0.725706	7	66351586
cg00406338	0.000660648	-1.10504	0.649007	0.658811	0.635836	0.658036	0.628851	0.698417	0.702477	0.737396	20	57267528
cg00407100	0.0093475	-1.11564	0.685367	0.734349	0.713597	0.649226	0.677298	0.745309	0.767969	0.797115	5	60954824
cg00410206	0.00061946	-1.11278	0.604298	0.616867	0.638428	0.656781	0.640327	0.70342	0.703805	0.70408	14	96115739
cg00414260	0.00491962	-1.4401	0.039704	0.0480609	0.0488462	0.0487526	0.0580386	0.0707631	0.0658054	0.0739571	6	109704515
cg00415242	0.00118006	-1.12765	0.57864	0.616248	0.611072	0.600952	0.586782	0.670018	0.665642	0.688859	5	2388149
cg00415670	0.00413881	-1.15515	0.372782	0.395041	0.380526	0.39938	0.368885	0.420996	0.452595	0.453764	7	116195234
cg00415735	0.00225953	-1.15064	0.448397	0.475087	0.475113	0.465362	0.473722	0.553657	0.514071	0.546431	13	23423450
cg00415822	0.00118403	-1.1747	0.341752	0.32775	0.346025	0.317835	0.333438	0.379092	0.387327	0.406909	19	57998706
cg00417078	0.00145192	-1.12838	0.520963	0.528247	0.4823	0.508296	0.500843	0.54186	0.575321	0.597798	7	63489870
cg00417231	0.00753043	-1.10446	0.583984	0.541372	0.512816	0.526512	0.494414	0.560632	0.57701	0.616051	4	7453673
cg00419310	0.00338608	-1.52787	0.086187	0.0876891	0.0852383	0.0985765	0.0681594	0.1389	0.11757	0.133753	2	101742158
cg00420361	0.000524259	-1.27098	?	0.0768375	0.0765288	0.0809773	0.083555	0.102284	0.0998553	0.0997732	16	67449937
cg00420859	0.00387891	-1.24614	0.145474	0.12614	0.132777	0.138985	0.12739	0.155837	0.171653	0.173374	16	49314826
cg00424740	0.00772539	-1.10747	0.737106	0.706884	0.681766	0.719197	0.700913	0.746135	0.805996	0.800276	11	100935756
cg00438763	0.00795728	-1.11554	0.586921	0.622383	0.590257	0.623345	0.60319	0.651277	0.702509	0.672033	5	5048666
cg00442814	0.00224779	-1.4654	0.070738	0.0782994	0.0954812	0.101763	0.0817213	0.121386	0.128982	0.126635	8	81785326
cg00447867	0.00309579	-1.10254	0.595399	0.58932	0.582966	0.597247	0.552438	0.635221	0.62923	0.662053	2	120438247
cg00448868	0.0088577	-1.10213	0.669647	0.611589	0.601036	0.629903	0.607662	0.676918	0.683992	0.698091	16	66775493
cg00452016	0.00839291	-1.78229	0.0149929	0.027893	0.0409086	0.0311493	0.0289773	0.0581193	0.047217	0.0482414	5	43603138
cg00453111	0.00689498	-1.16143	0.104242	0.0993272	0.109319	0.0998392	0.0947807	0.118871	0.11533	0.119295	18	60384370
cg00454233	0.00923655	-1.10443	0.547321	0.573245	0.545908	0.561853	0.566347	0.590837	0.642109	0.618593	5	17012531
cg00457403	0.00969624	-1.44672	0.20526	0.242484	0.233697	0.259943	0.197149	0.291538	0.370734	0.326397	3	187387734
cg00458681	0.00166982	-1.3043	0.229638	0.225443	0.222771	0.235575	0.214742	0.296214	0.266234	0.318754	22	19010419
cg00462994	0.00386902	-1.22944	0.115416	0.118031	0.111808	0.122	0.107832	0.145808	0.130028	0.147687	17	42081955
cg00464046	0.00479281	-1.19274	0.489897	0.517635	0.527549	0.462466	0.484732	0.55843	0.601877	0.61333	7	134854551
cg00466108	0.00957107	-1.42779	0.0290172	0.0203155	0.0176991	0.016609	0.0184735	0.024906	0.0256808	0.0362846	1	65731689
cg00466898	0.00228385	-1.11283	0.688251	0.682068	0.730698	0.720794	0.734082	0.790361	0.782024	0.805376	10	13089772
cg00467160	0.00409283	-1.11662	0.394335	0.412151	0.42644	0.426416	0.439181	0.466001	0.465757	0.476484	13	50014904
cg00471141	0.000123969	-1.1579	0.567083	0.567357	0.579133	0.554489	0.560401	0.669063	0.654894	0.64193	8	19796299
cg00472292	0.00418676	-1.60473	0.0564578	0.0372645	0.0599015	0.064816	0.0531633	0.0810114	0.0943652	0.0862917	4	184580884
cg00475606	0.000750246	-1.27627	0.0748556	0.0694728	0.0717277	0.070537	0.0721318	0.0935086	0.0848659	0.0959869	4	89205600
cg00478127	0.00296285	-1.23779	0.0739246	0.0847474	0.0760988	0.0709014	0.0794429	0.0911867	0.0963142	0.0979994	3	57112588
cg00481457	0.0080695	-1.35114	0.0300318	0.0368193	0.0504761	0.0415854	0.0429275	0.0539623	0.0602658	0.0503335	18	21269165
cg00483718	0.00613908	-1.10076	0.603241	0.637511	0.63666	0.614059	0.638943	0.678204	0.676355	0.711889	12	132520433
cg00493400	0.00503584	-1.29629	0.0392574	0.0463084	0.0459004	0.0481597	0.0494114	0.0555328	0.0639059	0.0590853	2	191879127
cg00494665	0.00689422	-1.19824	0.110239	0.116176	0.11465	0.124441	0.108327	0.141378	0.129742	0.141378	12	65218728
cg00497023	0.00755398	-1.13467	0.615807	0.563762	0.577846	0.603947	0.610091	0.697251	0.648461	0.677757	9	83025216
cg00497380	0.00656936	-1.27183	0.329681	0.359683	0.372942	0.364315	0.420292	0.505557	0.443124	0.464253	13	28340047
cg00497698	0.00300515	-1.15916	0.816092	0.756516	0.762888	0.794724	0.721589	0.897176	0.867899	0.909769	10	30003189
cg00498419	0.00484663	-1.27757	0.186472	0.197725	0.181778	0.170375	0.162168	0.214637	0.246264	0.226469	10	129925077
cg00499657	0.00368738	-1.18036	0.302706	0.312634	0.315141	0.285441	0.303556	0.35093	0.337805	0.384689	22	19157408
cg00499707	0.00820365	-1.12005	0.68421	0.66712	0.699676	0.693672	0.653343	0.781388	0.724156	0.777276	20	34679665
cg00501774	0.0081131	-1.11473	0.577328	0.553931	0.559926	0.578107	0.543269	0.644275	0.595478	0.639663	9	125132660
cg00503090	0.00732075	-1.24563	0.0859599	0.0950265	0.107579	0.115317	0.0977723	0.138904	0.132116	0.106543	6	158652500
cg00505381	0.00855013	-1.26973	0.0445795	0.0468831	0.0575088	0.0499286	0.0477924	0.0607183	0.0626624	0.0648836	2	241526834
cg00512459	0.000438086	-1.11239	0.705015	0.695587	0.674261	0.66742	0.655198	0.723572	0.757477	0.780474	15	88266173
cg00513717	0.00397497	-1.15634	0.450871	0.497844	0.47989	0.474965	0.509263	0.563864	0.548387	0.562773	2	111409228
cg00514628	0.00942345	-1.32093	0.0494531	0.0596669	0.0723718	0.0667095	0.0650465	0.0779705	0.093591	0.0778965	22	30819337
cg00516966	0.0078695	-1.10223	0.59476	0.622436	0.592105	0.59904	0.59129	0.621436	0.669858	0.688327	17	19651653
cg00517261	0.00818965	-1.15332	0.358982	0.365505	0.362291	0.372301	0.352402	0.438193	0.38726	0.427282	12	323801
cg00518276	0.00593487	-1.1285	0.47447	0.50739	0.502197	0.52398	0.495638	0.556745	0.554567	0.583996	11	106148020
cg00522018	0.00793448	-1.33539	0.101654	0.105437	0.0907336	0.0978653	0.0853452	0.12996	0.139246	0.116091	9	139091378
cg00523384	0.00707646	-1.10844	0.669045	0.710211	0.708493	0.705714	0.682765	0.739754	0.78387	0.787742	4	104344566
cg00524374	0.00173326	-1.39333	0.213204	0.189846	0.19747	0.237946	0.23883	0.318309	0.292021	0.2919	10	3894968
cg00524728	0.00026066	-1.13383	0.546321	0.562029	0.540475	0.536292	0.549137	0.612581	0.599293	0.644766	11	76878630
cg00525011	0.00814797	-1.41737	0.288092	0.266596	0.313645	0.277168	0.224306	0.364738	0.354265	0.443397	16	122031
cg00526276	0.00597096	-1.22602	0.499624	0.590857	0.584444	0.551628	0.576702	0.7243	0.65757	0.6828	16	14431423
cg00527489	0.00391851	-1.31793	0.202576	0.183084	0.185598	0.180299	0.219135	0.248822	0.271653	0.24772	1	214360954
cg00531092	0.00841314	-1.52373	0.0928505	0.114566	0.10531	0.124466	0.117949	0.141472	0.186648	0.17951	17	5487846
cg00532998	0.00218468	-1.40795	0.0401631	0.0309325	0.0434347	0.0464258	0.0463461	0.0574262	0.061846	0.0564311	13	41768820
cg00535027	0.00457417	-1.1087	0.573602	0.565996	0.594598	0.60228	0.57656	0.644724	0.628546	0.665138	4	8593933
cg00538370	0.00794341	-1.34096	0.0724204	0.0872854	0.0713264	0.0922278	0.0826033	0.110629	0.102695	0.113137	2	8823090
cg00538717	0.00426309	-1.1514	0.595562	0.668594	0.656308	0.632645	0.645998	0.731992	0.725126	0.752899	6	34123544
cg00543099	0.00620816	-1.2136	0.526828	0.601583	0.529605	0.585014	0.554946	0.644203	0.65903	0.729682	6	48697703
cg00547441	0.00959646	-1.27947	0.0465838	0.045796	0.0528314	0.0574523	0.0580808	0.0630017	0.0769833	0.0612861	7	50344724
cg00549433	0.00312942	-1.18603	0.39825	0.422625	0.423356	0.393831	0.413148	0.4611	0.476841	0.519123	2	15700282
cg00556279	0.00216881	-1.24319	0.119955	0.124764	0.118154	0.107423	0.101296	0.130713	0.141767	0.152065	12	120031649
cg00560072	0.00897939	-1.11516	0.657321	0.66815	0.715052	0.688174	0.67317	0.745209	0.742531	0.788906	1	61750543
cg00563797	0.00398748	-1.21303	0.0735888	0.0731103	0.0787052	0.0742482	0.0821749	0.087877	0.0988174	0.0917251	22	50781211
cg00566759	0.00442816	-1.42529	0.080436	0.0876243	0.0601136	0.0738025	0.0750846	0.104802	0.114476	0.102687	18	28682345
cg00567492	0.00053646	-1.21626	0.099104	0.100087	0.104976	0.110475	0.100647	0.123387	0.127016	0.126093	17	10018643
cg00567536	0.00268095	-1.53426	0.0337126	0.0503733	0.0486872	0.0553445	0.0463862	0.0735308	0.0762705	0.0664005	3	47422272
cg00568027	0.0045687	-1.20521	0.0829043	0.0912519	0.0949297	0.085441	0.0954051	0.112903	0.105224	0.107728	1	229644024
cg00568384	0.00503189	-1.1733	0.581067	0.604644	0.542325	0.509029	0.527527	0.575619	0.647029	0.711915	2	173539262
cg00572089	0.00349827	-1.29487	0.2247	0.214051	0.224158	0.225813	0.254372	0.306805	0.274846	0.306909	12	33750494
cg00574563	0.00714995	-1.27101	0.128919	0.138335	0.121687	0.154058	0.15041	0.178027	0.181257	0.170542	17	35299270
cg00576596	0.00647114	-1.10325	0.746472	0.691033	0.738338	0.733952	0.72432	0.78228	0.801744	0.821281	20	17752288
cg00579605	0.000113095	-1.22206	0.589217	0.574664	0.587841	0.565029	0.56665	0.723131	0.681678	0.708362	20	55309394
cg00584713	0.00565631	-1.18493	0.0709789	0.0727945	0.0739612	0.0675652	0.0779236	0.0891256	0.082715	0.0864835	1	213124685
cg00586383	0.000805477	-1.11716	0.635634	0.635971	0.624934	0.62761	0.595415	0.684076	0.675893	0.72623	17	75528194
cg00588430	0.00884842	-1.13097	0.558412	0.609456	0.543992	0.559505	0.58597	0.612434	0.642439	0.678953	11	117400424
cg00594278	0.000107249	-1.21031	0.247535	0.261722	0.26474	0.262903	0.250705	0.31161	0.312459	0.311429	22	40296407
cg00598693	0.00266817	-1.10621	0.679308	0.671487	0.687642	0.716787	0.737443	0.79246	0.770244	0.760864	2	10261684
cg00599354	0.00949783	-1.16935	0.0899869	0.0961321	0.0845545	0.0979409	0.0960928	0.106967	0.111865	0.107305	10	83580344
cg00603110	0.00565659	-1.11088	0.608411	0.607181	0.62016	0.618527	0.610883	0.645258	0.690395	0.706027	6	134395621
cg00606190	0.00103895	-1.21004	0.445569	0.500815	0.463284	0.459364	0.464408	0.573665	0.545428	0.573414	12	16761702
cg00608540	0.00310253	-1.13947	0.53412	0.496033	0.511106	0.526159	0.483941	0.576885	0.582732	0.583675	5	180627973
cg00608926	0.00994231	-1.13358	0.462108	0.503137	0.470705	0.479073	0.498614	0.545089	0.518975	0.575122	1	52995550
cg00610692	0.000518815	-1.17619	0.630125	0.591325	0.604286	0.584866	0.61704	0.720954	0.692397	0.721685	2	74668072
cg00612299	0.00701117	-1.16225	0.299215	0.308099	0.255869	0.270137	0.251841	0.329607	0.296881	0.334011	19	14584761
cg00613523	0.00175945	-1.13621	0.625128	0.626181	0.637639	0.62368	0.582137	0.69214	0.692737	0.722072	1	156117697
cg00615260	0.00943584	-1.34048	0.0610942	0.053633	0.0631512	0.0642902	0.0616951	0.0721845	0.0812694	0.0908051	1	43823944
cg00615913	0.00919485	-1.13857	0.117879	0.108038	0.116597	0.107311	0.114556	0.12595	0.124333	0.134714	20	37063096
cg00616888	0.0039463	-1.12636	0.641964	0.639955	0.643522	0.654718	0.645777	0.747255	0.686707	0.745276	2	15921917
cg00618711	0.00547361	-1.11852	0.543918	0.54772	0.570457	0.571356	0.567145	0.6	0.631718	0.648396	16	70688052
cg00619497	0.00345187	-1.51243	0.0603343	0.0673203	0.0689223	0.0702894	0.0721179	0.0922443	0.0973129	0.117872	13	48878736
cg00621366	0.00120547	-1.15077	0.537619	0.516091	0.523588	0.478237	0.49743	0.57565	0.580775	0.602279	1	226322846
cg00626422	0.00685917	-1.37265	0.0723023	0.0653319	0.0912509	0.0934554	0.0965732	0.135065	0.107659	0.104242	7	22894849
cg00632679	0.00153328	-1.10975	0.597838	0.605477	0.585576	0.617596	0.590273	0.671219	0.645907	0.67677	2	241174012
cg00632792	0.00295756	-1.23005	0.0848645	0.0902116	0.0930681	0.094888	0.0840346	0.117519	0.108657	0.104441	4	170679230
cg00635528	0.00374165	-1.38242	0.0250472	0.029832	0.0180754	0.0223375	0.0216873	0.031751	0.0276936	0.0369933	17	43224934
cg00643341	0.00725201	-1.17875	0.0683737	0.0744212	0.0778949	0.0718709	0.0762444	0.0857159	0.0839326	0.0912246	15	89147847
cg00643724	0.00165853	-1.23568	0.0589416	0.0621826	0.0636299	0.0614941	0.0585088	0.0711424	0.0743754	0.0801444	11	59522279
cg00646555	0.00197956	-1.24205	0.413557	0.441001	0.434537	0.396076	0.4597	0.532291	0.51606	0.549163	2	71130883
cg00649480	0.00775849	-1.14283	0.343259	0.329663	0.36735	0.348083	0.329676	0.405955	0.409918	0.365748	5	3593413
cg00651186	0.00366828	-1.12827	0.600626	0.62106	0.635717	0.634255	0.603267	0.678819	0.689631	0.725704	9	137313409
cg00651649	0.00420145	-1.12411	0.789931	0.75705	0.763256	0.740056	0.713614	0.846223	0.860243	0.829907	15	66373287
cg00656210	0.000777209	-1.23355	0.0643936	0.0699674	0.0643731	0.0680071	0.0663644	0.0782771	0.0846812	0.0834156	11	62078793
cg00656917	0.00237505	-1.13109	0.407077	0.420875	0.406498	0.383022	0.371984	0.445493	0.432611	0.467644	1	32422024
cg00663029	0.00526969	-1.12788	0.578793	0.556591	0.55139	0.542635	0.568887	0.623054	0.592989	0.672522	11	119194159
cg00664418	0.00578105	-1.12512	0.068267	0.0768497	0.0777527	0.0788221	0.0771353	0.0878814	0.0875117	0.0812742	1	6673075
cg00667081	0.00786774	-1.13031	0.551368	0.589456	0.60588	0.567096	0.568609	0.627178	0.651723	0.67491	12	132310086
cg00669363	0.000296614	-1.28107	0.121363	0.114946	0.107079	0.112809	0.110863	0.150334	0.139094	0.145805	13	49684335
cg00671225	0.00718267	-1.10667	0.440095	0.457801	0.450172	0.459841	0.446604	0.48655	0.482085	0.526208	6	133138165
cg00672381	0.008446	-1.10626	0.522456	0.539179	0.533709	0.519068	0.532536	0.556438	0.57499	0.621871	17	62690240
cg00674903	0.00948043	-1.13376	0.668448	0.67453	0.56912	0.570441	0.632507	0.707429	0.66491	0.735571	10	115371072
cg00676224	0.00573468	-1.49736	0.0385289	0.0449289	0.0344828	0.0452393	0.0455807	0.0609864	0.0550827	0.071246	11	75946680
cg00677218	0.00381313	-1.13028	0.63905	0.62916	0.636695	0.650935	0.636879	0.681781	0.735625	0.746397	20	17728429
cg00683996	0.0036086	-1.41737	0.0441461	0.0568382	0.0578205	0.0517779	0.049404	0.0804587	0.0729521	0.0680403	1	161195704
cg00688241	0.00833292	-1.22669	0.399105	0.441347	0.491185	0.462258	0.435312	0.523059	0.549501	0.570194	3	84126846
cg00689900	0.00694959	-1.10819	0.452922	0.478487	0.470692	0.451785	0.474559	0.51023	0.497344	0.538553	10	135173447
cg00690544	0.00769578	-1.13418	0.201981	0.219981	0.217287	0.204967	0.197166	0.232553	0.230799	0.244141	19	36618552
cg00694357	0.00810491	-1.33879	0.0670365	0.0725184	0.0831591	0.0743919	0.0819449	0.100431	0.0931453	0.11104	1	154976647
cg00700483	0.00233891	-1.10121	0.662393	0.69662	0.665067	0.651325	0.65148	0.725892	0.70183	0.764776	17	63199492
cg00703276	0.00847462	-1.14787	0.437467	0.483081	0.441196	0.462718	0.463968	0.505961	0.506171	0.560504	3	131245609
cg00703609	0.00814326	-1.13524	0.472192	0.48971	0.488202	0.526267	0.507957	0.547561	0.561354	0.584285	4	42393253
cg00707406	0.00151062	-1.18824	0.422019	0.445365	0.459275	0.415406	0.444052	0.524123	0.505501	0.528787	5	140167620
cg00708105	0.00741562	-1.47447	0.156422	0.156117	0.133544	0.152896	0.11979	0.197923	0.241219	0.196444	12	101110754
cg00708598	0.00665423	-1.23437	0.207427	0.19948	0.202377	0.221708	0.215308	0.258221	0.237566	0.278516	13	53313895
cg00709805	0.00908315	-1.32219	0.039318	0.0518438	0.0543937	0.0497991	0.0483725	0.0612081	0.0682821	0.0642308	14	68286698
cg00712405	0.00393511	-1.13712	0.678916	0.746234	0.768931	0.733924	0.765113	0.839406	0.876793	0.810636	11	93678683
cg00712582	0.00706036	-1.23935	0.355413	0.416961	0.347834	0.359323	0.379169	0.485271	0.438951	0.456216	1	37551235
cg00718333	0.0071935	-1.37296	0.0423471	0.0391003	0.0474995	0.0456407	0.0348056	0.0619176	0.0568919	0.0539632	1	111683195
cg00720451	0.000254806	-1.11904	0.615396	0.638126	0.60949	0.606457	0.623366	0.675571	0.686207	0.711587	3	46948267
cg00723424	0.000309219	-1.11018	0.755822	0.719126	0.716271	0.711695	0.717489	0.787887	0.794666	0.824644	22	44526144
cg00724015	0.00489151	-1.11787	0.646245	0.67173	0.667895	0.648874	0.65793	0.697144	0.75216	0.757164	2	119145086
cg00724662	0.0045685	-1.26238	0.0884852	0.0960773	0.0979537	0.0986506	0.0809584	0.117385	0.11588	0.116774	11	62573193
cg00724989	0.0040231	-1.10676	0.693594	0.714805	0.737159	0.722391	0.731937	0.771773	0.802319	0.817451	2	214616504
cg00728317	0.00081522	-1.57424	0.0445602	0.0541901	0.0560801	0.0475263	0.0514469	0.0854169	0.0843488	0.0701507	16	56692033
cg00730441	0.00693145	-1.10568	0.739729	0.732793	0.674602	0.735117	0.676148	0.760746	0.76109	0.830221	17	59483863
cg00731411	0.002503	-1.24631	0.0995526	0.0892794	0.0894333	0.0840924	0.0826523	0.103146	0.103089	0.124828	2	71127576
cg00735586	0.00667686	-1.40372	0.0747335	0.0694706	0.0831533	0.0675536	0.0740811	0.108487	0.116757	0.0864149	1	1711716
cg00738841	0.00334285	-1.21777	0.0991125	0.096043	0.109471	0.109471	0.100961	0.13111	0.119335	0.126606	11	133402474
cg00740088	0.00667093	-1.36629	0.0941656	0.0938263	0.0980055	0.112531	0.101219	0.135835	0.122714	0.151008	18	19745316
cg00741295	0.00816362	-1.3141	0.20044	0.231663	0.243851	0.219362	0.237729	0.279378	0.284092	0.329288	3	164910562
cg00741946	0.00554457	-1.31005	0.116021	0.105334	0.0875413	0.101549	0.107244	0.11898	0.135691	0.150542	2	122042964
cg00743929	0.00179216	-1.20982	0.0728385	0.0686232	0.0677347	0.063159	0.0682779	0.0808162	0.076206	0.089328	3	50375535
cg00744145	0.00506262	-1.10846	0.735891	0.695138	0.738545	0.737912	0.728454	0.782783	0.803231	0.831939	7	5324207
cg00746767	0.00711706	-1.10493	0.650356	0.622921	0.623825	0.603504	0.572902	0.675234	0.649503	0.706267	7	44299273
cg00754027	0.00455063	-1.40806	0.105616	0.0969194	0.0961169	0.0935351	0.0736707	0.13986	0.123117	0.129966	1	200590459
cg00756451	0.00303453	-1.40976	0.0971243	0.0870402	0.100326	0.0857657	0.103087	0.120699	0.139797	0.139832	12	114842700
cg00756808	0.00300562	-1.28936	0.055506	0.0527108	0.0628504	0.0552502	0.0636607	0.0747041	0.0728414	0.0771228	15	34629473
cg00759906	0.00575959	-1.17037	0.0826809	0.0754177	0.0811234	0.0887086	0.0902029	0.0986025	0.0989904	0.0968625	19	34856571
cg00760681	0.00238854	-1.14414	0.435752	0.424136	0.416206	0.451874	0.414632	0.499954	0.489551	0.481838	12	323773
cg00763679	0.00241199	-1.1694	0.0714217	0.0659849	0.073325	0.0755211	0.0762777	0.0866772	0.0914835	0.0774334	2	242254198
cg00766220	0.00632507	-1.17788	0.290705	0.316786	0.323693	0.32685	0.336883	0.368492	0.367924	0.39191	5	72598865
cg00767201	0.00169478	-1.15324	0.611386	0.650978	0.643778	0.631351	0.639142	0.717663	0.711492	0.766717	19	22141063
cg00767581	0.00986072	-1.32615	0.219577	0.25463	0.288406	0.256315	0.222148	0.309513	0.34231	0.336515	2	177015125
cg00767977	0.00497184	-1.12246	0.631674	0.672095	0.649596	0.602165	0.62722	0.713552	0.683778	0.741031	8	142231634
cg00771049	0.00436335	-1.33267	0.0175976	0.0174973	0.0192146	0.0168444	0.015305	0.0241855	0.0239002	0.0211238	9	127632167
cg00771161	0.00601053	-1.16329	0.503359	0.455826	0.449556	0.490751	0.466185	0.531436	0.532523	0.583405	7	104603404
cg00772020	0.00709541	-1.22404	0.249128	0.238951	0.325642	0.279753	0.278102	0.350583	0.342706	0.319615	7	100808104
cg00772775	0.00552632	-1.11603	0.667276	0.706118	0.708518	0.711655	0.677716	0.7539	0.767494	0.801947	8	1189684
cg00773205	0.00691779	-1.25161	0.0643623	0.081371	0.0793676	0.074783	0.0803868	0.098639	0.0943792	0.0931284	14	102829091
cg00775539	0.00142201	-1.13595	0.228914	0.235524	0.236588	0.235576	0.231024	0.26536	0.254404	0.275393	1	3370780
cg00776160	0.00619542	-1.26583	0.0688823	0.0738051	0.0789177	0.0713743	0.0755846	0.0918479	0.0861639	0.101673	1	149815087
cg00776327	0.0057051	-1.41462	0.0389592	0.0512671	0.0501822	0.0562938	0.0473113	0.0646753	0.0717555	0.0709072	14	31028938
cg00779638	0.00681039	-1.10968	0.666858	0.646058	0.64759	0.65213	0.647546	0.755824	0.689665	0.724284	9	88355164
cg00784308	0.00503546	-1.39854	0.0347008	0.0341753	0.0489642	0.0471371	0.0547816	0.0642522	0.0606525	0.0603795	1	220263509
cg00786406	0.00599463	-1.60925	0.0775522	0.0561726	0.0873664	0.0803842	0.0851474	0.125075	0.110181	0.138114	1	114474389
cg00790497	0.00144595	-1.10073	0.688834	0.704131	0.651011	0.679798	0.67294	0.72368	0.724663	0.787992	11	70699384
cg00791468	0.000348402	-1.18038	0.0784468	0.0832335	0.0766501	0.0776106	0.0768425	0.0919062	0.0941704	0.0918098	1	111148984
cg00793186	0.0052394	-1.2645	0.268271	0.304541	0.233145	0.205579	0.243323	0.315087	0.288612	0.34205	5	139283100
cg00797407	0.00278792	-1.19562	0.560359	0.516363	0.518085	0.506991	0.492135	0.585805	0.644877	0.6266	20	23113340
cg00803179	0.00690428	-1.36165	0.0696531	0.0636018	0.0663433	0.0669082	0.0546001	0.0839826	0.0763685	0.101072	8	110987144
cg00804392	0.000436588	-1.37074	0.0811688	0.0941734	0.0872668	0.0904352	0.0822346	0.114579	0.119074	0.124051	4	40198595
cg00805292	0.000423887	-1.15886	0.603457	0.612354	0.625212	0.624851	0.606192	0.695689	0.702635	0.736747	8	49816427
cg00806079	0.00323015	-1.10439	0.666428	0.650005	0.67338	0.669813	0.651783	0.704526	0.750072	0.739637	10	43629918
cg00811132	0.00690681	-1.16942	0.0678668	0.0765112	0.0723009	0.0699013	0.0724627	0.0852082	0.0788927	0.0874729	22	19511707
cg00814324	0.00149429	-1.12085	0.511995	0.530506	0.533678	0.526328	0.523077	0.581279	0.572649	0.610516	7	56155679
cg00814597	0.00679572	-1.27882	0.10902	0.0944011	0.0952259	0.0767625	0.0807893	0.114369	0.108607	0.125187	6	144386148
cg00815198	0.00430408	-1.14696	0.620605	0.642697	0.63626	0.624153	0.664578	0.694765	0.734462	0.763183	3	170498460
cg00815583	0.00760411	-1.31503	0.0506706	0.0675297	0.0664332	0.0714666	0.0775556	0.0898809	0.0939748	0.0806896	8	28348123
cg00818853	0.00782995	-1.10941	0.725955	0.661289	0.685327	0.673746	0.68236	0.732989	0.754407	0.790663	8	30660495
cg00823898	0.00470929	-1.13823	0.565709	0.624044	0.581356	0.567872	0.566042	0.664543	0.669188	0.648888	19	19343246
cg00830599	0.00570438	-1.1006	0.62314	0.65466	0.627614	0.601149	0.634264	0.665078	0.67802	0.725734	1	30398050
cg00833989	0.00539594	-1.38634	0.0705234	0.0805746	0.0856082	0.0985304	0.0891152	0.119204	0.110147	0.12418	4	93226245
cg00838898	0.00519731	-1.23459	0.0856145	0.0903356	0.0915576	0.0763512	0.086233	0.108782	0.0998655	0.109437	16	49309445
cg00840370	0.00128775	-1.16388	0.477097	0.523493	0.488869	0.492583	0.488675	0.588156	0.566106	0.570472	2	241497727
cg00841233	0.00187473	-1.12279	0.634897	0.643835	0.626881	0.585337	0.61784	0.666703	0.697209	0.724817	12	50280072
cg00842370	0.00461213	-1.122	0.689305	0.661213	0.678514	0.637865	0.676595	0.773385	0.725576	0.750661	2	233734916
cg00845020	0.000949701	-1.13965	0.534122	0.512025	0.487582	0.513047	0.490818	0.557852	0.5586	0.613004	11	112090920
cg00845350	0.00555825	-1.12722	0.640159	0.651488	0.669486	0.672915	0.673844	0.708702	0.778701	0.752086	16	51410516
cg00847722	0.000874476	-1.30326	0.303947	0.332162	0.337192	0.336986	0.307653	0.423875	0.401173	0.439702	1	25104799
cg00851894	0.00130544	-1.12147	0.749872	0.729833	0.75487	0.772459	0.733384	0.831658	0.825453	0.859398	6	153127476
cg00854448	1.49396e-05	-1.3642	0.0759237	0.0816933	0.0850732	0.0802708	0.0826765	0.111016	0.112564	0.108766	1	205288877
cg00855466	0.0026774	-1.12502	0.52142	0.498064	0.46447	0.473315	0.463747	0.553441	0.523557	0.551986	17	19652056
cg00856775	0.00172746	-1.10844	0.48757	0.477521	0.476876	0.461325	0.483496	0.539043	0.511946	0.534886	16	88504211
cg00857093	0.00499854	-1.18928	0.0599497	0.0645995	0.0678897	0.0696146	0.0765447	0.0871128	0.0827914	0.0731479	10	103541005
cg00857182	0.00681953	-1.47224	0.0624882	0.067512	0.0634189	0.0633513	0.0705733	0.0792042	0.105315	0.104415	10	104179024
cg00858941	0.00344613	-1.11785	0.566317	0.612269	0.597578	0.602791	0.60048	0.660477	0.653723	0.683731	11	100702777
cg00861695	0.00900574	-1.10046	0.768028	0.721168	0.710396	0.74739	0.693376	0.790871	0.775028	0.831763	13	24736455
cg00862930	0.00900915	-1.13555	0.506611	0.555848	0.540498	0.540248	0.530134	0.573997	0.616738	0.629352	4	7299445
cg00863306	0.0021666	-1.1124	0.152182	0.153241	0.140051	0.150103	0.149142	0.159941	0.165574	0.170413	19	13991470
cg00864012	0.00888085	-1.15457	0.589903	0.513468	0.514838	0.522296	0.511633	0.622152	0.591529	0.619379	17	62294665
cg00866399	0.00133649	-1.19571	0.105692	0.117994	0.106433	0.11296	0.107083	0.130632	0.131841	0.13192	2	73148052
cg00867901	0.00224498	-1.14494	0.401076	0.435872	0.399572	0.405826	0.426241	0.473511	0.466323	0.479853	14	99787006
cg00870713	0.00731756	-1.346	0.0547635	0.0577467	0.0534621	0.054116	0.051179	0.0733345	0.0820328	0.0639731	1	184722906
cg00872865	0.00410119	-1.23824	0.394653	0.373704	0.421571	0.380233	0.379666	0.465814	0.461257	0.519754	3	112770545
cg00872896	0.00198668	-1.2831	0.0543599	0.065571	0.0572831	0.0560741	0.0574222	0.0758575	0.0715865	0.0760425	4	57845442
cg00876332	0.00608761	-1.29121	0.364372	0.40812	0.362439	0.452599	0.375175	0.500645	0.510283	0.510204	Y	21664717
cg00877938	0.0095715	-1.10153	0.645766	0.664429	0.678775	0.64687	0.680886	0.711904	0.716423	0.76233	4	8692828
cg00880872	0.00205432	-1.1082	0.63687	0.655886	0.668978	0.633022	0.671694	0.722195	0.718123	0.732138	9	124887818
cg00891991	0.00773754	-1.22572	0.0661346	0.0727526	0.0674816	0.0637162	0.0763648	0.0832152	0.0884386	0.0832362	9	84302083
cg00897087	0.0051045	-1.54569	0.0989404	0.0861331	0.0826795	0.0879706	0.0678841	0.144844	0.11	0.13758	15	78342826
cg00902417	0.00706485	-1.12855	0.623284	0.648722	0.632494	0.56311	0.608476	0.67409	0.694515	0.709278	17	15492168
cg00907732	0.00242509	-1.19698	0.0871279	0.0783892	0.0773782	0.0803457	0.0751224	0.0893231	0.0940716	0.101735	14	37667219
cg00910115	0.00654751	-1.11787	0.474828	0.475377	0.542822	0.51681	0.501623	0.561024	0.568239	0.560285	9	34620794
cg00910297	0.00222831	-1.15542	0.0953981	0.101859	0.107374	0.104231	0.107002	0.116235	0.124564	0.117718	9	35732756
cg00913147	0.00658181	-1.10529	0.662144	0.658985	0.650912	0.68492	0.622898	0.734843	0.726709	0.713768	18	74276182
cg00917031	0.00272477	-1.13349	0.369141	0.355892	0.334796	0.347906	0.326294	0.36651	0.3851	0.422345	9	123477533
cg00919925	0.00621209	-1.10963	0.669071	0.677483	0.678576	0.68166	0.72823	0.743804	0.78335	0.762336	18	57899751
cg00920938	0.00433499	-1.10684	0.535542	0.568028	0.561241	0.584845	0.544949	0.618571	0.623804	0.61518	8	22036412
cg00921350	0.00349672	-1.20155	0.539643	0.536373	0.550838	0.516909	0.544938	0.637922	0.598639	0.697805	16	50701499
cg00926238	0.0088059	-1.20343	0.0809214	0.0861565	0.0962525	0.0909266	0.0867383	0.103288	0.117696	0.0987182	8	26436304
cg00933249	0.00339748	-1.12395	0.521537	0.527394	0.516291	0.516471	0.540377	0.580035	0.565551	0.619918	1	3723127
cg00934120	0.00248328	-1.30719	0.203673	0.235491	0.271164	0.270032	0.291395	0.327039	0.365153	0.310645	8	144467828
cg00936141	0.00352607	-1.92277	0.00863984	0.00912008	0.00881538	0.0146951	0.0131359	0.0219081	0.0249187	0.0155593	2	17935227
cg00937966	0.00946642	-1.10852	0.395555	0.42122	?	0.403316	0.391201	0.437458	0.429223	0.463554	12	111638995
cg00940560	0.00448751	-1.10449	0.54479	0.509628	0.530939	0.5229	0.503915	0.584273	0.575269	0.571191	8	30002079
cg00944304	0.00203836	-1.10238	0.649088	0.676438	0.680448	0.664154	0.685475	0.725339	0.739806	0.75453	15	40738072
cg00944484	0.0094458	-1.28001	0.0687945	0.0696606	0.0834121	0.0874922	0.0861867	0.105647	0.0943329	0.104829	10	89577532
cg00947019	0.00200896	-1.23542	0.064261	0.0625727	0.0650873	0.0742299	0.073284	0.0841478	0.0896395	0.0788128	7	44887958
cg00948114	0.00572755	-1.1805	0.0959797	0.102561	0.12048	0.111213	0.106021	0.134278	0.12693	0.120399	6	157745216
cg00949922	0.00137393	-1.27891	0.0763321	0.0698109	0.0721814	0.0733167	0.0800418	0.0955574	0.101238	0.0889626	1	16514382
cg00955230	0.00904043	-1.27163	0.0801674	0.0953861	0.0844646	0.085	0.0929705	0.103473	0.106119	0.123758	7	73669205
cg00959259	0.00502895	-1.42505	0.290458	0.434294	0.449604	0.469168	0.422985	0.59737	0.635574	0.539914	3	122281975
cg00963342	0.00843544	-1.10034	0.637634	0.662374	0.706521	0.676988	0.668616	0.745614	0.722158	0.748174	19	41046951
cg00965748	0.00261597	-1.15416	0.204434	0.206544	0.207426	0.209002	0.206004	0.230227	0.22968	0.254569	20	39319235
cg00965795	0.00102053	-1.10148	0.737296	0.760439	0.753642	0.735851	0.735371	0.838233	0.803161	0.818192	2	27957843
cg00966801	0.00171787	-1.12206	0.688491	0.671923	0.672376	0.676895	0.627874	0.73628	0.735995	0.770459	21	45152334
cg00969087	0.00703855	-1.15263	0.440354	0.471838	0.44043	0.449474	0.450259	0.493301	0.492875	0.566529	1	116710331
cg00970304	0.00361557	-1.12496	0.59192	0.562134	0.589287	0.61613	0.59591	0.678363	0.645027	0.673194	17	41881234
cg00971892	0.00741638	-1.14545	0.552505	0.58199	0.57644	0.553717	0.600397	0.623004	0.65826	0.686219	2	27135367
cg00973947	0.00120865	-1.21112	0.139433	0.154196	0.138734	0.150194	0.146638	0.17716	0.179875	0.172978	3	143692255
cg00974466	0.00258588	-1.5	0.0225742	0.0247763	0.0328165	0.028197	0.034151	0.0417434	0.0431508	0.0436069	7	128695161
cg00978814	1.33703e-05	-1.14269	0.45889	0.464012	0.449065	0.449174	0.461803	0.515345	0.517411	0.530832	7	150758260
cg00980047	0.00117595	-1.21056	0.399693	0.402174	0.410961	0.386348	0.38344	0.462116	0.458059	0.51647	12	121642721
cg00980060	0.00372044	-1.10164	0.577166	0.592413	0.574223	0.558506	0.571334	0.604626	0.64862	0.643339	1	14849511
cg00980784	0.00749532	-1.14376	0.230102	0.260278	0.228752	0.237724	0.239414	0.277202	0.266402	0.276106	17	47287577
cg00982214	0.0041203	-1.12631	0.532888	0.572774	0.543195	0.554208	0.532363	0.592802	0.603424	0.648422	1	202614080
cg00985086	0.00842758	-1.68051	0.0167327	0.00752332	0.0200307	0.0162055	0.0163376	0.0286706	0.027412	0.0213609	5	94620134
cg00987115	0.00480569	-1.12068	0.518464	0.513557	0.489162	0.513525	0.477357	0.54436	0.534456	0.604148	5	96418024
cg00988069	0.00364759	-1.11337	0.558981	0.578288	0.628344	0.622031	0.605749	0.693534	0.655874	0.656656	1	150240456
cg00988350	0.00996089	-1.12251	0.494522	0.44801	0.473713	0.468457	0.452466	0.503422	0.517832	0.549885	1	24126048
cg00993400	0.00293866	-1.2181	0.114995	0.114496	0.120334	0.120653	0.111039	0.143181	0.152689	0.130213	1	249153679
cg00994277	0.00433512	-1.16632	0.52232	0.569899	0.537278	0.523627	0.556665	0.596362	0.631423	0.665089	22	46539114
cg00994601	0.00889859	-1.52191	0.121283	0.132353	0.124963	0.105927	0.154088	0.199397	0.164776	0.218452	6	31628797
cg00997251	0.00364405	-1.17255	0.501783	0.492829	0.494757	0.474801	0.486985	0.56915	0.529485	0.620906	5	142444988
cg00998427	0.00564632	-1.29767	0.0583907	0.05389	0.0755829	0.0810744	0.0701331	0.086754	0.0952569	0.0836653	11	61323029
cg01000408	0.00483168	-1.32458	0.0813554	0.101361	0.107001	0.0960605	0.0945019	0.121636	0.1338	0.126816	19	41106994
cg01002622	0.00147282	-1.16717	0.519493	0.497414	0.501524	0.493127	0.459577	0.579406	0.576949	0.572223	1	41444693
cg01002722	0.00334886	-1.10939	0.557527	0.54152	0.533219	0.533016	0.4989	0.566203	0.581451	0.619976	7	5608879
cg01003176	0.00605273	-1.10004	0.535215	0.56909	0.57161	0.554725	0.574588	0.613151	0.606568	0.632075	5	177480639
cg01003613	0.00377594	-1.28339	0.0887342	0.093805	0.0897239	0.0970485	0.0832099	0.106408	0.121968	0.119758	11	118789809
cg01004063	0.00213059	-1.19675	0.494901	0.498478	0.516362	0.481935	0.464624	0.557148	0.605459	0.599408	14	88606476
cg01010307	0.00719434	-1.12266	0.643866	0.665567	0.651175	0.6207	0.656341	0.687508	0.752211	0.738797	15	65711238
cg01011748	0.0016576	-1.28696	0.0876125	0.0954305	0.0794059	0.0705788	0.0842438	0.0985758	0.104428	0.117565	2	154729200
cg01013370	0.00746569	-1.38796	0.0368363	0.0449283	0.0380094	0.0353642	0.0417418	0.0468591	0.0538557	0.0627371	19	1077051
cg01014787	0.00526393	-1.18884	0.622736	0.590695	0.625696	0.640414	0.627907	0.71475	0.705102	0.794628	20	19235219
cg01023418	0.00902339	-1.57401	0.0951029	0.0953016	0.119709	0.140924	0.123245	0.160804	0.178067	0.203728	15	98628430
cg01025842	0.00262256	-1.24976	0.0926343	0.0839852	0.0873346	0.0944452	0.0965562	0.11816	0.107917	0.11533	16	67195069
cg01026249	0.00907074	-1.16353	0.646415	0.623868	0.58073	0.653563	0.561485	0.70807	0.677848	0.748043	5	139664350
cg01028142	0.00616168	-1.11381	0.710235	0.728352	0.766371	0.730472	0.775435	0.815821	0.819913	0.846547	2	7004578
cg01030121	0.00199269	-1.2286	0.0820948	0.0817685	0.0811294	0.0837233	0.071657	0.0975318	0.0997346	0.0976575	12	72667236
cg01031146	0.00766873	-1.19024	0.0523512	0.0563748	0.049522	0.0544589	0.0540371	0.058052	0.0644209	0.0675442	3	184081222
cg01033175	0.00298093	-1.26656	0.0752217	0.0848467	0.0725719	0.0678791	0.0737585	0.0896985	0.0854052	0.107791	3	101396021
cg01035771	0.00659718	-1.10046	0.622348	0.658967	0.620209	0.620978	0.630176	0.658271	0.686382	0.731545	14	100788625
cg01040630	0.0012357	-1.77237	0.019	0.0184216	0.0262596	0.0259117	0.025831	0.0501269	0.0403023	0.0320173	8	114449804
cg01041681	0.00469384	-1.13314	0.372498	0.396657	0.380933	0.403061	0.378935	0.437258	0.422368	0.452962	5	140481682
cg01044662	0.00982768	-1.16797	0.410637	0.46619	0.37059	0.404045	0.418743	0.471605	0.46231	0.51061	2	75938360
cg01044961	0.00794399	-1.18795	0.07977	0.0703961	0.0805737	0.0859314	0.0765062	0.0992237	0.0927201	0.0891963	14	102026525
cg01046174	0.0016878	-1.40633	0.0572465	0.0576251	0.060844	0.0468019	0.0604118	0.0785862	0.0809168	0.0791777	2	209130700
cg01046961	0.0049279	-1.1044	0.677604	0.652649	0.675169	0.683096	0.652686	0.748404	0.70954	0.755058	4	190474558
cg01048810	0.00102822	-1.11706	0.597818	0.56939	0.54443	0.534306	0.559091	0.605467	0.622581	0.646099	1	45142815
cg01049133	0.0064712	-1.12701	0.560309	0.559149	0.52428	0.582089	0.570669	0.611637	0.640211	0.638372	9	137997407
cg01049520	0.00630319	-1.12471	0.548984	0.504254	0.496888	0.508593	0.475129	0.542927	0.564829	0.596237	17	46578524
cg01052294	0.00792603	-1.11182	0.480577	0.518883	0.502216	0.496109	0.49106	0.536542	0.537257	0.583384	19	53088327
cg01052743	0.00778885	-1.30611	0.0650602	0.0566478	0.0770925	0.060373	0.0747677	0.0887083	0.0906553	0.0832709	8	128747083
cg01060153	0.00360674	-1.11539	0.503583	0.529163	0.526141	0.518061	0.531532	0.559503	0.589254	0.596562	15	27660581
cg01060165	0.00695615	-1.16101	0.0674327	0.0741955	0.0777714	0.0761807	0.0737696	0.0884993	0.0824063	0.0868097	19	50321417
cg01060804	0.005052	-1.22262	0.0682985	0.0655903	0.0800089	0.0749092	0.078518	0.0864297	0.092248	0.0916039	2	27274802
cg01069470	0.0017818	-1.11139	0.569079	0.563247	0.558984	0.561036	0.554997	0.601102	0.607581	0.65925	22	33158236
cg01070781	0.00835673	-1.22492	0.268588	0.266921	0.330352	0.323512	0.336782	0.392894	0.357934	0.37611	15	34787400
cg01074928	0.00767017	-1.24693	0.0601539	0.0707331	0.0700596	0.0647457	0.0731707	0.088771	0.0902563	0.075443	6	32145543
cg01080592	0.00400709	-1.27998	0.0811931	0.0941547	0.100784	0.0915462	0.0993919	0.116662	0.118181	0.124289	19	36248739
cg01081584	0.00895235	-1.1193	0.76246	0.791891	0.769345	0.769867	0.791667	0.815171	0.872403	0.91733	15	40268610
cg01084194	0.00372314	-1.12374	0.578166	0.600918	0.530673	0.544037	0.535576	0.634404	0.582056	0.655959	19	6092564
cg01084239	0.00350879	-1.25798	0.0747437	0.0731634	0.0815822	0.0674172	0.0775994	0.0982316	0.0917684	0.0928902	11	8102510
cg01087690	0.00204158	-1.10766	0.714387	0.708006	0.717362	0.716908	0.670982	0.784293	0.783423	0.776193	11	131533670
cg01089395	0.00296274	-1.4005	0.112507	0.105178	0.11932	0.119162	0.103266	0.140232	0.160107	0.169462	6	139094051
cg01090445	0.00464813	-1.22376	0.0812042	0.0865859	0.0816565	0.0821042	0.0815024	0.0993133	0.109829	0.0944418	3	49893948
cg01092365	0.00874736	-1.19381	0.352536	0.41492	0.397799	0.383023	0.386964	0.447273	0.447625	0.489651	3	12668988
cg01095837	0.00451891	-1.10846	0.681251	?	0.721795	0.704701	0.704909	0.768658	0.773482	0.794711	1	23763767
cg01096738	0.00936442	-1.26614	0.105479	0.118448	0.113506	0.118502	0.0957436	0.133117	0.132808	0.152142	1	6053742
cg01098812	0.00161718	-1.18218	0.0947729	0.099386	0.0968718	0.0981197	0.0918865	0.109866	0.109437	0.121166	14	77591726
cg01099220	0.000888686	-1.4473	0.0872213	0.103971	0.0931609	0.09736	0.0834674	0.124879	0.134894	0.143676	8	145747659
cg01100951	0.00326305	-1.11111	0.766005	0.717614	0.68234	0.69697	0.684903	0.788404	0.775929	0.794396	4	15453598
cg01108369	0.00104732	-1.11406	0.606807	0.598152	0.605236	0.593102	0.565871	0.663248	0.657022	0.662747	5	178954560
cg01109535	0.0030325	-1.18182	0.482547	0.49863	0.477706	0.496451	0.508146	0.547286	0.608926	0.590318	16	24856104
cg01110356	0.000156548	-1.21877	0.054616	0.0579063	0.0590804	0.0618395	0.0604967	0.0711689	0.0736896	0.0705418	6	27357008
cg01114900	0.00595553	-1.32242	0.102057	0.0960669	0.0934762	0.0874465	0.0920444	0.106475	0.117728	0.147736	5	138088641
cg01115857	0.00132402	-1.10906	0.579732	0.576274	0.546577	0.558395	0.584195	0.629698	0.615701	0.644945	14	73695018
cg01116187	0.00521052	-1.11234	0.570569	0.610825	0.588072	0.610618	0.579985	0.644301	0.649729	0.679826	14	79666313
cg01118078	0.000721528	-1.28974	0.0670071	0.0721855	0.0779658	0.07447	0.0830994	0.100129	0.0954027	0.0952014	20	33297179
cg01120412	0.00184418	-1.22036	0.0688256	0.0667859	0.0655136	0.0634267	0.058475	0.0771394	0.0809705	0.0780062	7	124569797
cg01122302	0.00922376	-1.18138	0.0594223	0.0580969	0.0549808	0.059506	0.0567222	0.0664762	0.0619102	0.0755247	17	42392668
cg01124297	0.00261566	-1.16513	0.555115	0.575798	0.53634	0.53193	0.544483	0.588819	0.651899	0.671851	2	43541916
cg01125058	0.00259583	-1.29721	?	0.112529	0.100443	0.116748	0.104525	0.142036	0.141184	0.140291	8	81595314
cg01131291	0.000508186	-1.14904	0.416959	0.390754	0.402189	0.410241	0.408673	0.456328	0.472036	0.470327	X	53314237
cg01133262	0.00898818	-1.16339	0.142654	0.139804	0.149743	0.14063	0.140825	0.166495	0.153929	0.177067	22	38863905
cg01137326	0.00385049	-1.29224	0.0549183	0.0633803	0.0620697	0.0621502	0.0581683	0.0756149	0.072663	0.084558	20	626288
cg01137401	0.00313117	-1.24502	0.271181	0.246037	0.225989	0.261766	0.261342	0.321382	0.310106	0.313828	3	147107349
cg01138020	0.00782329	-1.44041	0.032228	0.0410331	0.0425594	0.0353248	0.0476143	0.0643198	0.0576094	0.0503326	17	4337094
cg01139586	0.00301805	-1.21239	0.445934	0.442871	0.384615	0.42692	0.389026	0.458401	0.484229	0.568631	14	90798784
cg01139966	0.0095019	-1.49961	0.0481248	0.0344531	0.0493382	0.0533653	0.0629716	0.071416	0.0752044	0.0771295	1	150669796
cg01142811	0.00397239	-1.25394	0.35169	0.309343	0.293838	0.329649	0.28479	0.378632	0.368676	0.428741	5	96144364
cg01143862	0.00826695	-1.16889	0.529083	0.473307	0.521809	0.56658	0.538966	0.59761	0.629857	0.620458	16	34510373
cg01145364	0.00991033	-1.32285	0.0675264	0.0795277	0.0877426	0.0771875	0.0743793	0.0926633	0.106431	0.10768	16	30969135
cg01146514	0.000375827	-1.32269	0.0700815	0.068723	0.071043	0.0629736	0.0648384	0.0837989	0.0884055	0.0952233	17	42422409
cg01148568	0.00599253	-1.10051	0.759649	0.714286	0.729093	0.698603	0.70188	0.774896	0.80717	0.79421	1	236116933
cg01152499	0.00125353	-1.23035	0.0652329	0.0625825	0.0682279	0.070897	0.0720554	0.0801701	0.0875895	0.0830743	1	118148320
cg01154193	0.00768553	-1.15058	0.154138	0.138783	0.154708	0.148655	0.158075	0.169951	0.172556	0.17859	1	32670957
cg01154334	0.00399478	-1.13088	0.525305	0.540077	0.526092	0.519474	0.545162	0.572799	0.589669	0.636353	1	210435558
cg01154429	0.00114816	-1.10394	0.669208	0.638921	0.637128	0.640605	0.61385	0.702318	0.699962	0.713786	10	48393869
cg01158527	0.00707381	-1.22973	0.491902	0.531101	0.511976	0.566688	0.560533	0.638178	0.625369	0.700457	11	134864216
cg01158742	0.00844053	-1.27554	0.372756	0.370379	0.335456	0.387541	0.346695	0.482856	0.403268	0.497852	1	3684581
cg01160570	0.00475562	-1.13402	0.566662	0.598252	0.584585	0.5736	0.53389	0.625582	0.655226	0.660104	2	118935865
cg01165387	0.00944841	-1.79094	0.136986	0.134429	0.15963	0.142804	0.164845	0.32471	0.205747	0.262805	2	38828637
cg01165770	0.00194269	-1.1077	0.729302	0.690395	0.692879	0.710721	0.726047	0.772486	0.788628	0.79688	13	19757900
cg01166876	0.000972756	-1.12275	0.566358	0.593551	0.603037	0.587911	0.580611	0.645051	0.667484	0.662973	2	36018275
cg01166979	0.00478581	-1.13429	0.115069	0.108759	0.109534	0.114349	0.119649	0.131846	0.125715	0.128832	3	13921889
cg01168439	0.00233356	-1.32917	0.217494	0.201246	0.211826	0.225564	0.184826	0.26843	0.263406	0.297073	19	28957339
cg01170045	0.00218934	-1.23904	0.0971526	0.103858	0.0931593	0.105383	0.0913644	0.117396	0.11869	0.128092	14	60982832
cg01177190	0.00676345	-1.17556	0.529357	0.500247	0.538077	0.554548	0.49821	0.625492	0.583901	0.638576	7	50782591
cg01179550	0.00448407	-1.10838	0.625513	0.66943	0.618478	0.619598	0.646323	0.687016	0.685816	0.736448	2	96774249
cg01184522	0.00706691	-1.1808	0.0363387	0.0393231	0.0449091	0.0431706	0.041741	0.0498382	0.0473948	0.0488448	1	247495818
cg01185573	0.00548457	-1.11299	0.652711	0.681646	0.686617	0.713785	0.705277	0.760214	0.753163	0.785841	3	135432551
cg01185825	0.00740503	-1.20254	0.105877	0.100586	0.117335	0.103016	0.106293	0.13161	0.121433	0.131846	5	784467
cg01185921	0.00733022	-1.22363	0.566369	0.496727	0.537051	0.519008	0.450941	0.619759	0.612806	0.650235	10	116444463
cg01185940	0.00650167	-1.20879	0.0687582	0.0759903	0.0803723	0.0803613	0.0766629	0.0883133	0.0923942	0.0967371	5	139537065
cg01186457	0.00932626	-1.1533	0.195483	0.180927	0.176622	0.187857	0.202358	0.221911	0.215241	0.215784	19	36336503
cg01188674	0.00363178	-1.10862	0.606008	0.587281	0.636301	0.649221	0.625166	0.675919	0.701238	0.691666	20	7328339
cg01193690	0.00104437	-1.51493	0.0641774	0.0684575	0.0585139	0.0642822	0.0705606	0.090974	0.0925856	0.112364	13	28491615
cg01194320	0.00239227	-1.16889	0.588729	0.616929	0.590475	0.593535	0.645073	0.712322	0.73561	0.683259	16	50493166
cg01194538	0.00937885	-1.15881	0.622926	0.530729	0.573182	0.596984	0.583675	0.685924	0.681903	0.655991	22	43043270
cg01199228	0.00992956	-1.16053	0.420343	0.48578	0.470616	0.461968	0.458855	0.517716	0.525326	0.555979	10	129448059
cg01199494	0.00200369	-1.12417	0.570174	0.588817	0.594884	0.58792	0.599205	0.667929	0.636951	0.678812	20	39994320
cg01200145	0.00549827	-1.10405	0.65003	0.67045	0.654581	0.639818	0.64295	0.720297	0.677634	0.7552	1	151818600
cg01210113	0.00525806	-1.3013	0.156231	0.139304	0.145222	0.154612	0.125463	0.172548	0.190915	0.19828	16	11352835
cg01214061	0.00640041	-1.34955	0.0834957	0.0908594	0.0725572	0.0811438	0.0774422	0.120004	0.107424	0.100738	4	174290520
cg01217128	0.00806751	-1.21902	0.0752501	0.0826432	0.0901114	0.0888758	0.0850741	0.0982354	0.102439	0.108347	1	94147591
cg01220720	0.00695802	-1.12807	0.501639	0.512127	0.525949	0.511278	0.541512	0.563628	0.579821	0.611017	6	32167020
cg01223512	0.00413255	-1.3794	0.0647595	0.0489546	0.0504426	0.0545173	0.0467879	0.0714791	0.0711983	0.0765226	4	129784819
cg01225948	0.00019131	-1.16126	0.465112	0.456031	0.43964	0.437091	0.438341	0.524895	0.494406	0.535244	1	22366897
cg01229562	0.00327096	-1.55344	0.0386562	0.054287	0.0480058	0.0527953	0.0393617	0.0733743	0.0698085	0.0740623	1	145473700
cg01230491	0.00902349	-1.13627	0.292612	0.321418	0.313082	0.305857	0.293868	0.332918	0.339438	0.366571	9	117044
cg01234133	0.00731652	-1.23951	0.137971	0.164629	0.159388	0.165533	0.157006	0.184812	0.194124	0.204598	17	48279072
cg01236465	0.00712165	-1.29852	0.136891	0.160526	0.170889	0.165995	0.159795	0.199026	0.197011	0.222867	19	18210076
cg01236573	0.00390888	-1.14605	0.562015	0.52654	0.518138	0.51859	0.521322	?	0.582955	0.638046	1	26248897
cg01238361	0.00588235	-1.20853	0.228682	0.190681	0.229406	0.232409	0.233021	0.277607	0.265189	0.267267	7	158225896
cg01238672	0.000432052	-1.24642	0.372813	0.361465	0.370624	0.379358	0.389846	0.494785	0.452121	0.456454	6	170232143
cg01240094	0.00546206	-1.14364	0.0724477	0.0767955	0.0730549	0.0807397	0.0792383	0.0879507	0.0863547	0.0882528	21	33784522
cg01243789	0.00784599	-1.10051	0.688069	0.691273	0.748209	0.739346	0.731916	0.781378	0.788094	0.810743	17	15721523
cg01244663	0.00755541	-1.31679	0.406397	0.326718	0.367056	0.395478	0.3172	0.459505	0.481947	0.489671	13	75801289
cg01244953	0.00500211	-1.32221	0.0332108	0.0356804	0.0392702	0.0317325	0.0396437	0.051277	0.0476923	0.0438327	10	125853038
cg01246405	0.000712738	-1.18382	0.113113	0.122789	0.109729	0.111279	0.116782	0.132519	0.13466	0.139507	11	3876562
cg01248598	0.00468388	-1.12246	0.601445	0.61849	0.638162	0.652412	0.64356	0.69781	0.695735	0.73223	13	104583916
cg01254719	0.00771213	-1.29416	0.366055	0.357947	0.33678	0.403355	0.33338	0.419378	0.46997	0.503758	20	57978234
cg01255060	0.00858763	-1.41432	0.0851533	0.0649295	0.108323	0.0965865	0.080597	0.133319	0.135667	0.102496	3	36742597
cg01256165	0.000652448	-1.13619	0.471667	0.480981	0.489087	0.461028	0.465009	0.524872	0.53563	0.551933	20	62716606
cg01256227	0.00477123	-1.38791	0.367509	0.496589	0.520538	0.49845	0.437521	0.640704	0.663671	0.631596	6	10099432
cg01260106	0.00363805	-1.28791	0.0657024	0.0686409	0.0827864	0.0824954	0.0800196	0.092973	0.102133	0.0992598	15	78370247
cg01260219	0.00518744	-1.14196	0.408946	0.42503	0.432887	0.408743	0.396914	0.457769	0.45822	0.501204	11	130299333
cg01263861	0.00542808	-1.15486	0.327899	0.32223	0.303856	0.320567	0.301695	0.358932	0.381459	0.351243	4	184249810
cg01266159	0.00455855	-1.15336	0.536416	0.533515	0.616109	0.591897	0.554412	0.674513	0.646491	0.645078	12	34452177
cg01266368	0.00549106	-1.10655	0.7353	0.725142	0.705978	0.675515	0.70225	0.797641	0.737099	0.811836	6	153453173
cg01267485	0.0057314	-1.20218	0.600358	0.573629	0.589932	0.571679	0.605512	0.643797	0.731822	0.743255	19	41970023
cg01269469	0.00487117	-1.18443	0.102311	0.109606	0.106398	0.0947253	0.107177	0.126019	0.122817	0.120753	7	155090211
cg01270370	0.00229355	-1.17722	0.581007	0.580047	0.566378	0.551264	0.579103	0.633537	0.647229	0.731603	15	60742022
cg01270466	0.00225031	-1.19682	0.107559	0.11466	0.119665	0.123529	0.123066	0.138878	0.139657	0.144765	14	96506401
cg01272851	0.00017572	-1.12234	0.716407	0.70921	0.731104	0.74842	0.748198	0.828778	0.812853	0.821617	12	110092636
cg01273287	0.00382654	-1.42382	0.0402456	0.0518254	0.0504278	0.0523235	0.0449019	0.0754965	0.068347	0.0613739	14	62228901
cg01274233	0.0032887	-1.14695	0.539902	0.547364	0.540872	0.554771	0.521243	0.597521	0.59713	0.662193	5	178704915
cg01279709	0.0059729	-1.28542	0.0593258	0.0635998	0.0716098	0.0814901	0.0698508	0.0906187	0.0874711	0.0895917	13	28196083
cg01283712	0.00736739	-1.10184	0.681057	0.68416	0.682899	0.678472	0.644688	0.718216	0.715385	0.789259	14	106919294
cg01285144	0.00258855	-1.5938	0.103431	0.0842508	0.125363	0.100694	0.125744	0.159563	0.179259	0.177342	11	5174983
cg01285237	0.00238606	-1.10095	0.711514	0.72128	0.72691	0.708903	0.712834	0.761977	0.778095	0.822524	15	97739602
cg01288674	0.00443709	-1.52051	0.0450583	0.0548667	0.0563342	0.0605553	0.0723223	0.0816036	0.0952604	0.0873037	18	45936515
cg01290714	0.00468237	-1.12115	0.438683	0.46325	0.445375	0.413542	0.420513	0.465733	0.4869	0.510188	19	18124639
cg01290885	0.000232561	-1.48647	0.0739711	0.0783204	0.0765993	0.0754003	0.0654812	0.103177	0.113636	0.112768	12	107350933
cg01291762	0.00332535	-1.22694	0.0481454	0.0486067	0.0417289	0.0447526	0.0445281	0.0558192	0.0580675	0.0535436	10	105453425
cg01291947	0.00191401	-1.3444	0.196716	0.194565	0.157263	0.176533	0.199977	0.236206	0.234188	0.273369	21	34305156
cg01297020	0.00721341	-1.12457	0.5933	0.643639	0.616302	0.630508	0.576843	0.686359	0.678835	0.697913	13	106117425
cg01298758	0.00921112	-1.11027	0.672078	0.646298	0.634856	0.64511	0.683829	0.757586	0.713737	0.715832	11	11862611
cg01299462	0.000227675	-1.14293	0.516845	0.499135	0.490127	0.483333	0.464238	0.549173	0.547792	0.580932	15	55575244
cg01299997	0.00932158	-1.14251	0.392102	0.392589	0.421516	0.403419	0.378998	0.444548	0.482937	0.438074	7	100886961
cg01304814	0.00110185	-1.43338	0.0191732	0.0208065	0.0239844	0.0262604	0.0213588	0.0352931	0.0332864	0.0277239	3	48885189
cg01306161	0.00512185	-1.32917	0.0401241	0.0408398	0.0528855	0.0606836	0.0498286	0.0704685	0.0646914	0.0608711	18	55289380
cg01306795	0.00927884	-1.10096	0.778131	0.748607	0.821011	0.782987	0.771904	0.842998	0.854822	0.881322	15	44455634
cg01307398	0.000346922	-1.30001	0.2519	0.233201	0.253192	0.244928	0.246289	0.308048	0.312681	0.337623	10	15760648
cg01310473	0.00151404	-1.32627	0.0732677	0.0694042	0.0826707	0.0672161	0.0719505	0.0973519	0.0982047	0.0947867	7	76829168
cg01313320	0.00676251	-1.24283	0.075084	0.0679044	0.070843	0.0677685	0.0754149	0.0806481	0.0887961	0.096246	2	46526265
cg01313904	0.00265779	-1.38969	0.0668997	0.0585124	0.0549768	0.0614077	0.0550282	0.0870875	0.0842167	0.0761769	16	86609963
cg01314574	0.00610274	-1.11352	0.579814	0.543995	0.553285	0.5597	0.52843	0.593954	0.628403	0.622863	21	46858801
cg01322848	0.00173661	-1.10186	0.696266	0.700948	0.691765	0.68833	0.698115	0.734806	0.760143	0.798952	1	216993839
cg01323696	0.00450265	-1.37924	0.316951	0.284324	0.27721	0.303358	0.296018	0.435837	0.350869	0.434552	3	52705086
cg01326455	0.00654215	-1.10419	0.573967	0.582704	0.571774	0.588606	0.536912	0.623905	0.612799	0.65077	20	55946933
cg01327147	0.0097858	-1.15453	0.715968	0.667816	0.723642	0.642736	0.647062	0.788248	0.79734	0.767097	9	34371380
cg01327863	0.00583252	-1.30303	0.175261	0.169016	?	0.163917	0.155066	0.192893	0.197913	0.243891	11	64878267
cg01329511	0.000450081	-1.10641	0.489024	0.490262	0.439836	0.460838	0.463897	0.504299	0.507954	0.538035	2	73440431
cg01329690	0.00556614	-1.17831	0.497321	0.543939	0.519182	0.498272	0.488221	0.553613	0.608934	0.633597	21	38580129
cg01330815	0.00230127	-1.1249	0.465057	0.494108	0.474516	0.448427	0.474593	0.522843	0.516129	0.548535	1	204652225
cg01338139	0.00939002	-1.21904	0.516979	0.487375	0.42908	0.526245	0.498093	0.565415	0.609844	0.619362	15	38987640
cg01338255	0.00130798	-1.23655	0.1374	0.143272	0.145137	0.143897	0.157452	0.174643	0.179756	0.185425	20	30176054
cg01338917	0.0016233	-1.25164	0.0722251	0.0662362	0.0665501	0.0704085	0.0638941	0.08771	0.079703	0.0870741	17	9549496
cg01339484	0.00580592	-1.22812	0.0932082	0.110728	0.100149	0.0952315	0.105143	0.127484	0.124298	0.120063	8	7544370
cg01339512	0.00985257	-1.14187	0.642964	0.609546	0.5625	0.565256	0.506069	0.657348	0.616938	0.691857	8	141583704
cg01342088	0.00512466	-1.10895	0.68597	0.751056	0.696016	0.706313	0.688093	0.763092	0.781591	0.79847	22	46257281
cg01344630	0.00647291	-1.30804	0.0636257	0.0782294	0.0556032	0.0629414	0.0602891	0.084943	0.0816204	0.0842984	3	120067467
cg01346950	0.00306949	-1.12016	0.598931	0.605566	0.587802	0.626307	0.603285	0.65535	0.670021	0.703614	14	69124929
cg01356297	0.00123703	-1.11147	0.692047	0.688502	0.686335	0.700884	0.676151	0.738468	0.762594	0.792842	3	54211772
cg01360084	4.44113e-05	-1.10054	0.788931	0.79567	0.757541	0.778902	0.758018	0.843164	0.84072	0.872684	22	41577728
cg01362541	0.00884155	-1.24831	0.614591	0.508615	0.543091	0.540869	0.53891	0.679412	0.733685	0.644777	20	55838142
cg01363065	0.00054179	-1.11756	0.586851	0.56874	0.626568	0.596353	0.614983	0.673114	0.683996	0.655205	12	47898790
cg01363383	0.00998518	-1.22086	0.0247211	0.0219721	0.0254568	0.0224992	0.0237177	0.0311481	0.0273166	0.0283305	10	111967257
cg01365883	0.0095593	-1.31682	0.0514461	0.0602239	0.0679512	0.0663191	0.0556495	0.0831037	0.0746709	0.0809355	15	63486163
cg01366338	0.00315076	-1.19295	0.543326	0.545709	0.544059	0.538428	0.4838	0.614037	0.656432	0.628423	1	19230460
cg01371154	0.00483031	-1.3886	0.0632207	0.0739473	0.0802644	0.0792204	0.0994169	0.111191	0.114388	0.105576	1	161736517
cg01371498	0.00620637	-1.23295	0.108609	0.111136	0.106765	0.114551	0.100766	0.135545	0.120324	0.144004	15	49255686
cg01373721	0.00769928	-1.36278	0.017755	0.0217886	0.0154966	0.0191442	0.0160159	0.0213429	0.0235975	0.0284497	10	51623735
cg01375248	0.00286106	-1.11506	0.688916	0.67176	0.665558	0.682697	0.653073	0.763107	0.714286	0.768722	3	142724451
cg01376622	0.00367691	-1.15032	0.634783	0.617579	0.563537	0.609137	0.542687	0.673241	0.67208	0.696259	12	7632641
cg01376839	0.0052274	-1.31388	0.0968889	0.110993	0.108008	0.086772	0.0879038	0.129125	0.124405	0.132326	10	86300400
cg01378158	0.000860233	-1.10615	0.618124	0.60604	0.608864	0.607688	0.61468	0.664247	?	0.689551	16	67312308
cg01379317	0.0069711	-1.21226	0.0772245	0.0871579	0.0864646	0.0903013	0.0791399	0.0984509	0.101386	0.105846	4	84030975
cg01379846	0.00887609	-1.14078	0.390424	0.395166	0.406252	0.440872	0.419908	0.458934	0.46378	0.483968	1	38227521
cg01382414	0.000915015	-1.21872	0.141382	0.139435	0.134846	0.138409	0.135245	0.174464	0.156479	0.17241	5	176056675
cg01384173	0.00182043	-1.26677	0.0897076	0.0940204	0.0816356	0.0886533	0.0926423	0.10427	0.116076	0.118461	19	17564348
cg01385352	0.00180393	-1.34561	0.075053	0.0640197	0.0717878	0.0792634	0.0722543	0.0923147	0.102086	0.0984329	6	158642173
cg01385412	0.000647193	-1.14294	0.563093	0.554536	0.527575	0.527668	0.543977	0.635715	0.607501	0.617531	2	74054322
cg01388957	0.00762443	-1.12291	0.0596728	0.0570566	0.0613739	0.0602126	0.063416	0.0678745	0.0658099	0.069781	9	4679439
cg01388988	0.00112919	-1.17997	0.602046	0.614499	0.601748	0.547585	0.60129	0.691109	0.673854	0.7309	1	4472067
cg01390309	0.0011596	-1.10487	0.780845	0.763767	0.727038	0.714888	0.7295	0.801973	0.829818	0.825804	1	40299885
cg01396302	0.00667144	-1.1871	0.582615	0.528438	0.603608	0.544754	0.562781	0.656052	0.648154	0.704612	3	185478498
cg01396303	0.00682578	-1.18863	0.205633	0.186339	0.215545	0.235924	0.208046	0.248959	0.260459	0.243267	11	26495152
cg01402735	0.0016552	-1.1817	0.287762	0.286202	0.319943	0.325844	0.311639	0.356518	0.36537	0.366612	1	79472558
cg01403803	0.00777646	-1.30626	0.0896679	0.0908641	0.0892918	0.107231	0.0926517	0.135481	0.113968	0.11932	5	123987218
cg01407477	0.00350706	-1.43539	0.183591	0.168877	0.158652	0.182491	0.160798	0.211116	0.264558	0.259241	8	99951151
cg01408989	0.0028411	-1.1481	0.687063	0.639864	0.670183	0.665094	0.615501	0.750237	0.741811	0.763544	1	28640578
cg01409598	0.00181507	-1.10775	0.548805	0.546995	0.537599	0.549619	0.519796	0.582964	0.582788	0.626728	22	39688935
cg01410476	0.00136374	-1.17582	0.578223	0.593714	0.563468	0.568771	0.565297	0.640774	0.643066	0.733808	14	27286128
cg01412886	0.0066936	-1.17747	0.359041	0.392982	0.41396	0.387679	0.374678	0.436112	0.458921	0.467761	14	105445253
cg01413522	0.00698569	-1.14399	0.578252	0.585844	0.60223	0.6241	0.609415	0.661027	0.673565	0.724304	16	86519105
cg01415826	0.00457195	-1.14381	0.448323	0.45493	0.499524	0.491861	0.519738	0.54736	0.557482	0.557105	13	101753209
cg01417798	0.00696477	-1.20357	0.553875	0.491228	0.53371	0.512676	0.475713	0.599472	0.583448	0.665919	6	13432829
cg01420215	0.00946406	-1.35728	0.0910694	0.0973977	0.102311	0.0830232	0.101449	0.112117	0.132501	0.141843	2	224821720
cg01420987	0.00355667	-1.28886	0.0587031	0.0542493	0.0592905	0.0670912	0.0573037	0.0835771	0.0770167	0.069581	16	21312694
cg01421252	0.00992583	-1.10032	0.709244	0.733155	0.707531	0.73508	0.773402	0.79249	0.80735	0.816318	16	5590677
cg01424901	0.00163313	-1.15838	0.432144	0.442582	0.438926	0.448476	0.44061	0.514913	0.483508	0.531316	1	21948680
cg01427471	0.00158017	-1.11834	0.722903	0.710354	0.691778	0.6711	0.695745	0.78391	0.738639	0.814186	11	134288416
cg01429321	0.00525465	-1.33795	0.078203	0.0686389	0.08118	0.0770995	0.0899033	0.106627	0.0992137	0.111558	5	121413797
cg01429614	0.00326041	-1.1673	0.681322	0.708616	0.729222	0.682009	0.751361	0.80216	0.85724	0.831128	11	22692250
cg01429653	0.00994211	-1.12949	0.453699	0.47013	0.480387	0.455359	0.503969	0.515619	0.544449	0.542816	12	48583991
cg01429844	0.00590063	-1.12459	0.585891	0.628497	0.57813	0.621465	0.621104	0.669461	0.674532	0.702165	12	50365827
cg01431063	0.00528155	-1.1188	0.0804547	0.0874698	0.0763868	0.0794533	0.0759348	0.0884572	0.0848459	0.0938737	10	115860903
cg01431992	0.0015756	-1.60278	0.0552003	0.0542933	0.0730668	0.0811629	0.093431	0.111442	0.129269	0.103214	12	118797027
cg01434349	0.00202367	-1.13759	0.624428	0.681366	0.651954	0.636868	0.626275	0.716479	0.724881	0.753715	11	118900337
cg01435220	0.00741685	-1.28946	0.0655458	0.0686456	0.0820056	0.0715868	0.06725	0.0865251	0.092577	0.0958007	17	42634155
cg01438174	0.00854132	-1.13676	0.463614	0.464781	0.439624	0.464924	0.434734	0.520446	0.496942	?	9	130640301
cg01439892	0.00231483	-1.1004	0.470336	0.483577	0.45858	0.468128	0.450516	0.508393	0.488589	0.537785	11	72949060
cg01441025	0.00598602	-1.19868	0.15796	0.158326	0.160551	0.176357	0.148683	0.18768	0.191234	0.197723	8	103136942
cg01444677	0.00424593	-1.14817	0.617697	0.60762	0.602704	0.565911	0.606124	0.644002	0.676354	0.739859	7	153751298
cg01448258	0.003363	-1.23807	0.0713514	0.076614	0.0759227	0.0673972	0.0801512	0.0897685	0.0936164	0.0925361	10	124895045
cg01449123	0.0073414	-1.162	0.517489	0.586788	0.547602	0.514101	0.557879	0.632134	0.610252	0.653737	6	6058138
cg01449136	0.00446241	-1.18847	0.166894	0.164626	0.148661	0.151634	0.154449	0.187929	0.165526	0.204487	14	61109317
cg01453114	0.0048708	-1.10714	0.641161	0.642688	0.662505	0.648	0.634502	0.687404	0.708	0.74719	21	45279625
cg01454595	0.00666518	-1.17801	0.683423	0.617822	0.697241	0.693165	0.615873	0.783754	0.77708	0.77875	5	140768431
cg01457077	0.00489381	-1.51221	0.109444	0.155152	0.197017	0.193255	0.207699	0.246907	0.295668	0.242527	2	239228573
cg01458504	0.00896995	-1.26541	0.0869063	0.0737289	0.0797955	0.0763036	0.0730743	0.102313	0.0875451	0.105351	4	156589291
cg01461840	0.00293157	-1.18275	0.0854815	0.0887736	0.0860769	0.0754691	0.0834085	0.0973003	0.099626	0.0999765	10	130085088
cg01462799	0.00210811	-4.83829	0.0359613	0.0394014	0.0382593	0.348316	0.346574	0.726584	0.733232	0.776766	19	18959208
cg01465177	0.00501971	-1.1279	0.404832	0.407736	0.392128	0.39534	0.379434	0.443814	0.413031	0.478073	3	182208536
cg01467419	0.00202454	-1.12418	0.107707	0.110785	?	0.105281	0.106279	0.118945	0.115154	0.125717	19	2900365
cg01467882	0.00513586	-1.3272	0.167354	0.191616	0.185102	0.167717	0.176729	0.24546	0.207369	0.253534	2	153192938
cg01467973	0.00652046	-1.10252	0.663114	0.699029	0.69442	0.681926	0.699832	0.72846	0.765849	0.77942	9	140339239
cg01469135	0.00723657	-1.10033	0.485659	0.523207	0.482074	0.503768	0.485935	0.54562	0.526567	0.562418	20	30085977
cg01470321	0.00408155	-1.4087	0.138881	0.128277	?	0.0978534	0.119795	0.16792	0.1651	0.17089	7	106788141
cg01470551	0.00522278	-1.27034	0.079265	0.0770053	0.0667264	0.0823415	0.0782523	0.0962432	0.0907484	0.104725	13	95620874
cg01471713	0.00795398	-1.19237	0.30877	0.356378	0.306379	0.318879	0.319969	0.362767	0.362482	0.422219	1	220864279
cg01473602	0.00105083	-1.10124	0.708114	0.701973	0.715098	0.702518	0.684734	0.752308	0.783389	0.7837	12	77257301
cg01476003	0.00106189	-1.29232	0.0768154	0.0739427	0.0826738	0.083347	0.0876284	0.0994157	0.110861	0.104005	16	71460486
cg01479530	0.0026866	-1.14084	0.547271	0.583157	0.568993	0.57035	0.54401	0.619402	0.63127	0.672315	2	113734215
cg01480831	0.00393834	-1.32366	0.0527825	0.048924	0.0445447	0.0440847	0.0413092	0.0642039	0.0614883	0.0579596	16	3184500
cg01482407	0.00786319	-1.31732	0.0881202	0.104569	0.0899515	0.0992509	0.0854737	0.113955	0.1129	0.141186	15	91446764
cg01483832	0.00965011	-1.3496	0.0653026	0.0678579	0.0601968	0.0757812	0.0751	0.0871067	0.104661	0.0875	10	104154200
cg01486752	0.00317721	-1.46089	0.0449774	0.0584138	0.0592744	0.0638917	0.0616523	0.0783674	0.0871555	0.0873944	6	166298540
cg01494352	0.00201431	-1.35399	0.0769231	0.0722244	0.0581114	0.0708581	0.0724793	0.0895089	0.0886495	0.105661	17	75461889
cg01495353	0.00306221	-1.29531	0.113658	0.116415	0.106565	0.123471	0.129009	0.145046	0.154756	0.158059	10	3110799
cg01495834	0.00801582	-1.10888	0.530103	0.562713	0.561148	0.565683	0.601924	0.626767	0.626442	0.627236	5	125965934
cg01497214	0.00726255	-1.39957	0.0620276	0.0458605	0.0660244	0.0593765	0.0623539	0.0770018	0.0850958	0.0864569	2	145277032
cg01500421	0.00354389	-1.50041	0.0195175	0.0200913	0.0180562	0.0147294	0.0197168	0.023221	0.0271322	0.0323674	5	140070872
cg01500633	0.000693261	-1.71841	0.0334173	0.0391861	0.0613759	0.0619173	0.0509411	0.0842653	0.0902399	0.0797376	6	86387148
cg01505275	0.00437275	-1.51987	0.131725	0.110488	0.197702	0.15601	0.170757	0.225986	0.244022	0.230738	11	4628823
cg01505627	0.00675205	-1.22321	0.446378	0.527282	0.496481	0.503646	0.460855	0.57896	0.573981	0.631309	6	128839793
cg01505700	0.00847815	-1.269	0.0565967	0.0610324	0.0626728	0.0594636	0.0639391	0.0685612	0.0806316	0.0819796	17	4853232
cg01508045	0.0098975	-1.36397	0.0921986	0.091949	0.133195	0.0950817	0.118866	0.160798	0.149631	0.126675	6	41516162
cg01512589	0.00607634	-1.23156	0.10564	0.118675	0.103878	0.106304	0.0950515	0.120363	0.120804	0.147983	9	98279517
cg01515659	0.00903707	-1.12666	0.500442	0.520027	0.50805	0.488685	0.490374	0.537483	0.535483	0.616028	1	110017393
cg01518090	0.00792722	-1.12328	0.686936	0.626719	0.695353	0.682703	0.6886	0.75902	0.742696	0.778261	11	12368253
cg01518593	0.00202908	-1.20317	0.149237	0.141787	0.169954	0.158983	0.153033	0.186439	0.187046	0.185935	19	51425053
cg01518805	0.00669727	-1.57343	0.052397	0.065552	0.0733172	0.0606821	0.0621083	0.0936813	?	0.103462	6	57086343
cg01523144	0.00894746	-1.13577	0.318368	0.323564	0.325627	0.336118	?	0.379189	0.353784	0.378171	1	47644725
cg01523712	0.00942791	-1.10162	0.746132	0.703538	0.735455	0.694246	0.721556	0.759488	0.801296	0.816305	20	43437858
cg01525337	0.000120619	-1.13503	0.654876	0.658953	0.605811	0.635396	0.613969	0.712711	0.697046	0.742315	11	44972881
cg01526553	0.00301755	-1.23644	0.389053	0.399712	0.400892	0.368459	0.353051	0.433255	0.462897	0.516823	12	56554264
cg01528028	0.00720316	-1.16036	0.140908	0.13979	0.140358	0.1224	0.134472	0.156011	0.147062	0.167282	13	100649800
cg01530154	0.00994402	-1.3686	0.196277	0.201853	0.172835	0.202207	0.155726	0.255478	0.21025	0.293829	6	28661712
cg01531127	0.00176945	-1.57488	0.106563	0.10012	0.113616	0.0865766	0.107136	0.147907	0.17823	0.159584	17	1269083
cg01534240	0.00855746	-1.98098	0.040016	0.0483238	0.0416252	0.0174532	0.0558473	0.0800167	0.0847095	0.0770492	12	46612026
cg01536547	0.00394552	-1.18917	0.263129	0.263124	0.240228	0.248122	0.262628	0.311889	0.278419	0.318619	17	39692361
cg01538605	0.00944939	-1.13015	0.611613	0.62194	0.685515	0.689138	0.635879	0.740245	0.720402	0.743889	6	169285957
cg01538960	0.00541061	-1.20396	0.073292	0.0850105	0.0972779	0.0884141	0.0948038	0.107533	0.110025	0.101082	17	33308238
cg01546433	0.00527439	-1.16669	0.436402	0.4805	0.437031	0.421296	0.455155	0.508592	0.489522	0.558035	11	27725095
cg01547494	0.00596719	-1.2109	0.0618626	0.0671706	0.0765728	0.0724436	0.0702412	0.0943618	0.0859653	0.0742503	13	110790937
cg01549162	0.00317059	-1.10237	0.730283	0.706726	0.701985	0.688258	0.693317	0.775566	0.794932	0.757162	6	16163800
cg01549292	0.00897671	-1.42831	0.0746802	0.0900107	0.0827283	0.0946718	0.0815616	0.103207	0.131561	0.128203	19	12751278
cg01553055	0.000839573	-1.23085	0.105031	0.103606	0.104579	0.107178	0.0974419	0.120851	0.126685	0.134295	13	40177863
cg01553182	0.000510894	-1.11459	0.711771	0.729703	0.758136	0.758136	0.754347	0.819877	0.832339	0.833654	6	29342533
cg01554625	0.000924523	-1.29812	0.144746	0.166179	0.180045	0.16327	0.176642	0.219052	0.229666	0.20064	6	30688579
cg01555330	0.0094893	-1.151	0.306597	0.305768	0.297688	0.269373	0.28466	0.309177	0.320177	0.376132	16	57612056
cg01555604	0.00824921	-1.25286	0.0540486	0.0601266	0.0506834	0.054477	0.0519012	0.0725597	0.0682713	0.0630126	14	45431583
cg01559356	0.000568577	-1.17285	0.0909515	0.0916237	0.10029	0.101276	0.0971715	0.115453	0.111371	0.112709	19	2282568
cg01561194	0.00320077	-1.21447	0.49587	0.483621	0.474961	0.507517	0.530991	0.572838	0.607068	0.635742	10	1595633
cg01561599	0.000241936	-1.12782	0.529301	0.537803	0.526869	0.514208	0.502744	0.577432	0.572699	0.612526	19	45277831
cg01570086	0.00564853	-1.19937	0.0683824	0.0648992	0.0696138	0.0693957	0.0795036	0.088332	0.0838788	0.0817254	15	74833080
cg01570309	0.00101815	-1.23002	0.245516	0.240517	0.237592	0.250383	0.257664	0.287417	0.305704	0.315451	15	96769266
cg01574360	0.00118848	-1.29777	0.0880172	0.0764264	0.0917018	0.0930335	0.0843121	0.110601	0.117371	0.11025	16	22910668
cg01580578	0.0028685	-1.16598	0.51698	0.540379	0.44989	0.485772	0.51034	0.562602	0.558438	0.622451	7	156889041
cg01581807	0.00682987	-1.18201	0.501183	0.52979	0.518923	0.540991	0.53833	0.577523	0.624384	0.661236	1	232714905
cg01583646	0.0059272	-1.22784	0.301203	0.286747	0.267273	0.26771	0.271023	0.338567	0.296172	0.386785	15	43576419
cg01586074	0.0088163	-1.10186	0.683258	0.712771	0.659143	0.693243	0.66362	0.712384	0.766948	0.771648	2	101586915
cg01586352	0.00660017	-1.10612	0.56229	0.5779	0.534779	0.50578	0.551652	0.606388	0.58084	0.620324	2	1871382
cg01587630	0.00123472	-1.60068	0.0856181	0.0814006	0.0932331	0.0861065	0.0734662	0.119048	0.143793	0.140307	7	23053820
cg01588177	0.00656951	-1.11265	0.594615	0.56605	0.602174	0.607984	0.602983	0.664609	0.638399	0.682978	14	19109264
cg01589543	0.000845661	-1.13493	0.494775	0.501233	0.50777	0.493072	0.497504	0.558912	0.547409	0.590261	7	73305660
cg01589760	9.07504e-05	-1.19091	0.084037	0.0893198	0.090439	0.08813	0.0888826	0.105538	0.107582	0.1023	11	537487
cg01591416	0.000991894	-1.2368	0.0970239	0.0893091	0.100881	0.107062	0.09684	0.120948	0.127505	0.117024	8	30601572
cg01596520	0.00833248	-1.10192	0.724591	0.733246	0.67509	0.684548	0.681092	0.797431	0.737819	0.772256	19	14225029
cg01597629	0.00537861	-1.21102	0.496569	0.49739	0.548387	0.452839	0.515869	0.611854	0.606721	0.606868	16	6953997
cg01598144	0.00545015	-1.12815	0.442601	0.464394	0.423454	0.412149	0.454377	0.484806	0.475768	0.521705	2	21856440
cg01601639	0.00217671	-1.11171	0.735014	0.749376	0.760873	0.735059	0.712939	0.800349	0.810972	0.848983	12	24901377
cg01603290	0.00714767	-1.35164	0.175452	0.132965	0.125801	0.124154	0.131923	0.189389	0.167321	0.200721	17	40805956
cg01605366	0.00760726	-1.10579	0.581164	0.620239	0.636905	0.656932	0.60851	0.700827	0.687159	0.675966	11	106255565
cg01605479	0.00532519	-1.13444	0.614203	0.621741	0.639	0.638007	0.637222	0.674223	0.729538	0.740322	5	159087524
cg01610915	0.000167131	-1.12222	0.630813	0.638008	0.630016	0.638547	0.616264	0.717657	0.694396	0.710499	22	29950274
cg01611504	0.0062587	-1.13218	0.652047	0.656708	0.679863	0.685984	0.69514	0.724198	0.779609	0.786651	7	108525503
cg01611748	0.00114341	-1.15087	0.0606874	0.0619821	0.0562086	0.0550105	0.0582331	0.0679481	0.0634746	0.0695971	6	119670533
cg01615050	0.00217463	-1.77733	0.26646	0.329711	0.346224	0.338563	0.314271	0.655249	0.6151	0.427589	6	25882559
cg01621606	0.00339669	-1.10487	0.689363	0.705768	0.688221	0.692901	0.676404	0.731214	0.744555	0.807613	2	189261761
cg01622399	0.00867177	-1.21574	0.38918	0.448184	0.444152	0.42945	0.464453	0.505441	0.523171	0.558472	11	134387905
cg01624917	0.0046072	-1.1419	0.574195	0.551338	0.565138	0.545591	0.546678	0.644971	0.592209	0.665822	16	4604149
cg01629716	0.00672589	-1.35359	0.116557	0.120674	0.129767	0.134807	0.118248	0.183779	0.147807	0.172315	15	45996671
cg01631816	0.00322275	-1.10946	0.729924	0.714543	0.696463	0.660708	0.647332	0.728794	0.735388	0.820621	12	30155743
cg01632230	0.00366762	-1.10028	0.740399	0.716683	0.701983	0.742063	0.721246	0.769583	0.798185	0.820629	10	6310075
cg01634664	0.00222335	-1.17973	0.408547	0.413351	0.405361	0.379009	0.392786	0.465272	0.435813	0.509126	14	91580142
cg01639244	0.00374107	-1.24647	0.0732995	0.0775642	0.0696883	?	?	0.0857342	0.0841993	0.0957155	9	37785151
cg01640444	0.000180388	-1.17812	0.0624394	0.0633815	0.0656184	0.066871	0.0643636	0.0755322	0.0795565	0.0734687	3	193311744
cg01640456	0.00443869	-1.21616	0.0776025	0.0652403	0.0832496	0.0826693	0.0845619	0.0966908	0.0978985	0.0936434	4	141075565
cg01640945	0.00122971	-1.11971	0.697332	0.670376	0.671908	0.679242	0.674353	0.749841	0.731277	0.794465	7	151006071
cg01642550	0.00214776	-1.20666	0.315242	0.313354	0.316539	0.313753	0.325294	0.373921	0.359719	0.411479	16	89098327
cg01643580	0.00101369	-1.20706	0.258608	0.236506	0.252136	0.245979	0.247563	0.285562	0.303875	0.308597	2	26916399
cg01646323	0.0070029	-1.23487	0.328439	0.279151	0.271295	0.282042	0.247388	0.330024	0.349499	0.359923	13	30982428
cg01652215	0.00147969	-1.26386	0.0842973	0.0900006	0.084072	0.0972043	0.0944062	0.113937	0.112489	0.115088	2	73963950
cg01652665	0.00540931	-1.23445	0.193971	0.208092	0.200258	0.205037	0.198364	0.241971	0.226318	0.274757	14	36987722
cg01655226	0.00278842	-1.12792	0.678872	0.625712	0.66883	0.648716	0.670899	0.733398	0.736372	0.758527	17	16955974
cg01657027	0.000377967	-1.11237	0.48477	0.501882	0.481789	0.489001	0.47488	0.547182	0.531963	0.542827	12	128512071
cg01663440	0.000388255	-1.23043	0.445361	0.40967	0.404917	0.415749	0.403701	0.514506	0.485268	0.53221	12	1056096
cg01663820	0.00449114	-1.1108	0.472497	0.499379	0.473061	0.475677	0.487384	0.509901	0.534893	0.557236	15	77952511
cg01665243	0.0059566	-1.17156	0.114722	0.127465	0.132784	0.126529	0.126544	0.151023	0.141352	0.149637	1	6546783
cg01671681	0.00453442	-1.11565	0.704513	0.648422	0.639813	0.616177	0.633729	0.705755	0.68902	0.766777	3	155421735
cg01673856	0.0077622	-1.10958	0.5653	0.571017	0.533151	0.546185	0.502897	0.585226	0.563393	0.652229	10	114847319
cg01676322	0.00419364	-1.11863	0.155839	0.15198	0.158215	0.163628	0.170535	0.18274	0.189114	0.16739	17	43213429
cg01679475	0.00703395	-1.11449	0.690263	0.680156	0.676043	0.691958	0.692132	0.72247	0.758117	0.809465	3	197239698
cg01679969	0.00999842	-1.11834	0.552879	0.509415	0.508023	0.520985	0.494608	0.595551	0.561575	0.575732	12	56402159
cg01680054	0.00441001	-1.108	0.707761	0.705972	0.787458	0.754631	0.726877	0.820111	0.824868	0.809402	3	491979
cg01683243	0.00642736	-1.21827	0.0775849	0.081448	0.085443	0.0919224	0.0956439	0.101131	0.114383	0.101582	2	234327934
cg01687663	0.00528502	-1.27589	0.166045	0.193777	0.200187	0.19481	0.171497	0.230444	0.232281	0.246443	2	219723061
cg01688679	0.00255459	-1.10959	0.602866	0.594321	0.635328	0.623467	0.591214	0.682309	0.66984	0.678336	18	71313866
cg01692995	0.00509327	-1.11504	0.500422	0.512995	0.469566	0.518179	0.50517	0.557928	0.550369	0.566784	8	10569063
cg01702210	0.00227118	-1.10746	0.627871	0.639896	0.632998	0.640578	0.624643	0.677745	0.688585	0.734211	14	58064926
cg01709288	0.0058459	-1.15261	0.058381	0.0571066	0.0648636	0.0600031	0.0642683	0.0680262	0.0731583	0.0700389	16	81111226
cg01709518	0.00979939	-1.11919	0.588046	0.635736	0.593773	0.610146	0.603886	0.64278	0.700549	0.690346	3	68053484
cg01710189	0.00209667	-1.48937	0.266491	0.306065	0.218978	0.254876	0.277262	0.41994	0.383279	0.378849	8	22454888
cg01712948	0.00595671	-1.49114	0.0887782	0.0704006	0.072567	0.0787655	0.0705138	0.105487	0.0968553	0.137677	2	89165761
cg01715299	0.00601424	-1.3447	0.221006	0.235568	0.268683	0.248002	0.229474	0.320516	0.295485	0.354069	1	111535465
cg01716083	0.00509631	-1.31487	0.0395215	0.0414729	0.0435913	0.0539333	0.050463	0.0604954	0.0610333	0.0597575	6	30029143
cg01720007	0.00758673	-2.89578	0.13024	0.59268	0.164861	0.159759	0.161498	0.680535	0.725276	0.748068	10	80944147
cg01720040	0.00910764	-1.13998	0.490969	0.465723	0.458411	0.451975	0.408955	0.511522	0.519496	0.52151	11	1581101
cg01722631	0.0083172	-1.16574	0.43307	0.463108	0.460434	0.455203	0.441867	0.489107	0.518683	0.565651	7	156136979
cg01722690	0.00326956	-1.1042	0.756034	0.766119	0.764988	0.746945	0.709853	0.814303	0.802759	0.858171	X	147581676
cg01722695	0.000346692	-1.28446	0.112167	0.107795	0.109352	0.113804	0.120739	0.140616	0.145847	0.148227	1	169862707
cg01728843	0.00822779	-1.13336	0.555082	0.545573	0.52966	0.571636	0.527014	0.633509	0.58284	0.636975	3	182977036
cg01729388	0.0097431	-1.29919	0.0620103	0.0719936	0.0629397	0.0778702	0.074136	0.0848728	0.0929769	0.0942807	4	119606443
cg01730148	0.00636518	-1.10109	0.58383	0.581615	0.562546	0.582774	0.571319	0.621632	0.60239	0.675066	2	3698421
cg01736407	0.00267189	-1.15842	0.465268	0.503661	0.486699	0.502783	0.481557	0.570705	0.541931	0.582424	2	176967665
cg01738593	0.00749673	-1.22895	0.107852	0.122309	0.116517	0.108913	0.11369	0.129349	0.133895	0.155247	5	133860282
cg01739210	0.000860321	-1.21097	0.179434	0.19232	0.183992	0.171892	0.187802	0.214417	0.225068	0.224992	9	20621641
cg01739327	0.00945744	-1.18783	0.217528	0.222449	0.218778	0.209158	0.201295	0.227118	0.248573	0.283066	11	85955219
cg01741532	0.00449004	-1.11581	0.525229	0.525649	0.546588	0.55676	0.537996	0.608837	0.578001	0.61651	14	26642961
cg01741836	0.00791572	-1.16865	0.589966	0.518495	0.481233	0.511718	0.493651	0.587167	0.609524	0.61635	5	95996644
cg01742897	0.0010268	-1.27451	0.0692117	0.0688958	0.0796235	0.0754318	0.0800567	0.0947124	0.0936651	0.0975884	18	53257019
cg01743395	0.000467314	-1.78973	0.085796	0.0795171	0.0580882	0.0825163	0.0718796	0.119026	0.133333	0.153982	6	26044030
cg01744344	0.00813637	-1.28162	0.0307201	0.0254382	0.0320066	0.0311056	0.0319212	0.0391925	0.044213	0.0334634	11	93517572
cg01746241	0.00121101	-1.14994	0.653095	0.624749	0.630714	0.609442	0.604367	0.709788	0.736935	0.706156	9	34370835
cg01748082	0.00396617	-1.10448	0.478173	0.485612	0.482221	0.492811	0.466359	0.519486	0.516724	0.555276	9	137772580
cg01748093	0.00973305	-1.38165	0.0601216	0.063108	0.0736314	0.0649121	0.0737141	0.0821245	0.0931614	0.102867	17	1588436
cg01748712	0.00693863	-1.11578	0.645293	0.588372	0.623389	0.613824	0.613164	0.687452	0.664641	0.710537	9	135821847
cg01749530	0.00638024	-1.31155	0.0644396	0.0756044	0.0637367	0.0678512	0.0541048	0.0873904	0.0807277	0.0875256	10	75255289
cg01751057	0.00213344	-1.32022	0.48731	0.485451	0.47805	0.402755	0.404416	0.61622	0.561828	0.606072	8	134261928
cg01751605	0.00870086	-1.22407	0.104141	0.100355	0.100563	0.115183	0.113593	0.122029	0.136353	0.1341	7	137028546
cg01752308	0.00190873	-1.1023	0.729941	0.717884	0.698164	0.698031	0.709627	0.752137	0.801612	0.793185	10	30014179
cg01754163	0.00791297	-1.11553	0.45525	0.464416	0.459489	0.438774	0.484445	0.524494	0.498544	0.51773	4	5958106
cg01754756	0.00857232	-1.21346	0.301405	0.25665	0.234037	0.253812	0.227664	0.283871	0.286517	0.350166	10	88728078
cg01755187	0.0049079	-1.10698	0.706369	0.750974	0.709422	0.682258	0.665874	0.778327	0.757641	0.792487	1	4759920
cg01755628	0.00715821	-1.13259	0.083946	0.0802192	0.0788063	0.0838098	0.0824253	0.0874277	0.0921006	0.0980362	14	24768634
cg01759597	0.00242464	-1.32062	0.0656058	0.0581992	0.0519919	0.0588546	0.0489343	0.0690959	0.0694318	0.0850176	7	96626788
cg01761228	0.0016926	-1.13693	0.66374	0.690989	0.66215	0.654015	0.631737	0.71156	0.758576	0.777508	2	115416787
cg01764082	0.00941581	-1.36416	0.0724212	0.104764	0.0963513	0.102296	0.0929128	0.126338	0.126534	0.131142	9	98784014
cg01765152	0.00668215	-1.30092	0.0806371	0.0856241	0.0676192	0.0745407	0.074761	0.0956638	0.0832421	0.118294	8	129005526
cg01766368	0.00747668	-1.41686	0.0196509	0.0249554	0.030119	0.0290025	0.0296809	0.0370456	0.0367716	0.0398682	1	150336910
cg01768814	0.00969932	-1.45327	0.0372756	0.0410857	0.0405938	0.0490006	0.0413623	0.0658633	0.0515815	0.0651108	17	65437355
cg01770019	0.000500704	-1.14932	0.508331	0.523672	0.529306	0.500938	0.533939	0.603122	0.589043	0.598544	1	11042161
cg01770654	0.00438249	-1.23198	0.259995	0.290345	0.245495	0.267808	0.224449	0.304127	0.306888	0.337197	5	140811343
cg01771937	0.00844241	-1.11783	0.678525	0.686702	0.715214	0.694183	0.698716	0.782964	0.735726	0.810022	20	42817526
cg01772563	0.00352013	-1.1727	0.249553	0.233904	0.252585	0.238921	0.227688	0.283831	0.291303	0.271725	7	95064399
cg01772945	0.00275001	-1.12424	0.736087	0.673575	0.699597	0.685837	0.680138	0.786236	0.769209	0.78653	7	64170364
cg01773217	0.000937171	-1.26693	0.117725	0.103626	0.108302	0.0978108	0.102965	0.132758	0.13108	0.1385	13	27335204
cg01775897	0.00281045	-1.12049	0.481879	0.450935	0.459194	0.483588	0.477818	0.525603	0.519926	0.536604	14	73146637
cg01775921	0.00295867	-1.10367	0.681323	0.67954	0.647063	?	0.683191	0.730498	0.744874	0.745955	6	30138213
cg01776592	0.00301037	-1.14113	0.179432	0.181725	0.157957	0.167628	0.167981	0.198249	0.189333	0.195881	10	135033590
cg01779747	0.00763305	-1.2159	0.0573422	0.0704828	0.060768	0.0605044	0.0615166	0.0757374	0.0728097	0.0776362	12	109748043
cg01782132	0.00437748	-1.22674	0.101197	0.10657	0.0983435	0.0937215	0.106588	0.121651	0.114112	0.135774	16	28936054
cg01783662	0.00838961	-1.34478	0.0870624	0.094517	0.0927768	0.107143	0.0984154	0.136748	0.113724	0.136889	3	181442676
cg01784614	0.00695656	-1.15291	0.412726	0.430565	0.411209	0.409387	0.394375	0.43318	0.471669	0.513907	5	40841298
cg01785568	0.00453627	-1.2445	0.327823	0.369261	0.349177	0.341559	0.34504	0.391215	0.4365	0.463687	4	4864833
cg01786985	0.00154816	-1.18773	0.486114	0.537811	0.519594	0.498571	0.505191	0.581514	0.61325	0.619032	7	93190336
cg01787834	0.00725771	-1.23078	0.140946	0.154287	0.157724	0.154619	0.168212	0.178276	0.194613	0.200409	6	31762723
cg01788396	0.00116854	-1.11138	0.576466	0.593399	0.562637	0.578004	0.591677	0.632961	0.631951	0.667457	1	32665584
cg01793179	0.00153989	-1.57902	0.0473479	0.0411832	0.0383481	0.0450067	0.0515158	0.0751304	0.0649103	0.0716101	3	10207023
cg01794103	0.00637963	-1.32922	0.0619525	0.066967	0.0671148	0.0684346	0.0620535	0.0845343	0.077056	0.0982811	15	78342494
cg01796781	0.0083474	-1.25961	0.0658205	0.0816099	0.0728218	0.0806439	0.0853449	0.0993465	0.0979415	0.0952313	1	38231768
cg01798255	0.00149382	-1.2426	0.356383	0.408012	0.379742	0.406919	0.396692	0.493349	0.471145	0.488391	1	19615804
cg01799681	0.00848602	-1.34361	0.222941	0.234963	0.263803	0.240138	0.229702	0.312134	0.286289	0.360995	6	11043368
cg01799854	0.00833696	-1.1101	0.494549	0.505597	0.496499	0.508206	0.523956	0.537417	0.559762	0.585951	4	48878895
cg01800445	0.00350138	-1.10495	0.745571	0.761676	0.746568	0.773636	0.769493	0.852926	0.806702	0.857036	1	3129115
cg01802653	0.00992988	-1.78049	0.0445372	0.0613652	0.031868	0.0421173	0.0636251	0.092727	0.0885457	0.0788825	4	89513149
cg01806526	0.00479696	-1.16881	0.350151	0.341855	0.297441	0.331526	0.288512	0.367148	0.350514	0.404744	16	33963216
cg01809099	0.00838262	-1.26928	0.0581043	0.0627874	0.0590642	0.054284	0.0603024	0.0772265	0.0806934	0.0667193	3	138067123
cg01809941	0.00191869	-1.15842	0.487526	0.518544	0.460514	0.468406	0.474207	0.547519	0.517028	0.60267	5	14581404
cg01811561	0.000539921	-1.33427	0.0536263	0.0557354	0.0536222	0.0576634	0.0625	0.0792979	0.0775568	0.0703192	16	67753396
cg01812146	0.00944648	-1.14703	0.51943	0.605169	0.564691	0.567366	0.582868	0.656881	0.652677	0.646067	1	94704178
cg01824969	0.00519388	-1.19681	0.065266	0.073807	0.0703314	0.0745336	0.0747431	0.0879823	0.0821295	0.0876546	8	67875261
cg01826233	0.00337355	-1.89463	0.043756	0.0812626	0.0693069	0.0691992	0.0525521	0.124253	0.107529	0.127766	4	174290598
cg01832997	0.0039543	-1.32042	0.14146	0.144589	0.135711	0.128337	0.134345	0.153867	0.181794	0.204543	10	102046743
cg01834614	0.00425295	-1.343	0.101415	0.0857631	0.0773697	0.0900985	0.0889747	0.121206	0.106059	0.129159	1	147143012
cg01836835	0.00291346	-1.13576	0.612014	0.619658	0.597004	0.602727	0.607379	0.654811	0.719316	0.694853	9	118731512
cg01838287	0.00846147	-1.13007	0.0816303	0.0902412	0.0834782	0.0842336	0.0893668	0.0947681	0.0988185	0.0972109	17	16948762
cg01838997	0.00111305	-1.1109	0.617743	0.625084	0.640607	0.664448	0.626117	0.702466	0.70912	0.706374	19	39603097
cg01840803	0.00956946	-1.20657	0.112506	0.122408	0.116677	0.111543	0.113719	0.125271	0.147755	0.143907	14	95624345
cg01841797	0.00884354	-1.23616	0.18487	0.182329	0.217602	0.217381	0.18101	0.237137	0.255144	0.239076	1	205424512
cg01844176	0.00331662	-1.26159	0.37268	0.41111	0.388934	0.359076	0.403453	0.480569	0.451296	0.529633	12	27176208
cg01844435	0.00104983	-1.12976	0.69556	0.735282	0.666103	0.707979	0.685174	0.778497	0.775918	0.806661	20	31363627
cg01844491	0.00915318	-1.23554	0.457809	0.455062	0.495709	0.450765	0.496686	0.526598	0.605421	0.614374	7	33972979
cg01845091	0.00310496	-1.3181	0.0717395	0.063573	0.0615132	0.0554949	0.0687437	0.0787286	0.0832814	0.0911423	14	64761519
cg01847457	0.00555861	-1.23453	0.112297	0.10802	0.0878922	0.102871	0.0883364	0.122562	0.109323	0.135701	19	3708292
cg01852007	0.00462271	-1.21486	0.131966	0.116879	0.123149	0.122084	0.114658	0.148831	0.136631	0.157169	16	691500
cg01854459	0.00361959	-1.30393	0.055627	0.0627415	0.0634523	0.0645255	0.0728352	0.0888353	0.0798114	0.0817121	4	122745104
cg01858828	0.00751964	-1.11731	0.699062	0.659313	0.692261	0.643385	0.630145	0.723756	0.733962	0.766032	6	14921628
cg01864395	0.00359274	-1.1098	0.670422	0.688508	0.663436	0.669475	0.714729	0.748237	0.769177	0.751704	17	76274140
cg01868588	0.00686537	-1.1753	0.0944138	0.0950491	0.104831	0.117218	0.107379	0.132148	0.120934	0.114874	1	212838943
cg01869186	0.00858797	-1.13181	0.37794	0.382342	0.347805	0.32232	0.361609	0.400626	0.374206	0.435598	7	100423987
cg01872593	0.0095463	-1.18011	0.398496	0.473769	0.439251	0.433733	0.435616	0.494054	0.512416	0.536026	14	54446260
cg01875106	0.000603447	-1.25147	0.375338	0.389033	0.400922	0.383495	0.398244	0.462998	0.487944	0.510456	11	132287342
cg01876490	0.00753919	-1.12888	0.849204	0.810766	0.751173	0.715531	0.711126	0.876927	0.81748	0.891693	18	63434119
cg01877848	0.00391657	-1.37106	0.202457	0.159289	0.17115	0.191318	0.210719	0.255542	0.262051	0.252304	21	40033783
cg01883578	0.000826721	-1.4163	0.0583026	0.0538306	0.0548545	0.0622835	0.0508194	0.0831345	0.0793229	0.0757027	16	52579244
cg01884989	0.00102911	-1.12637	0.747041	0.724738	0.755298	0.710608	0.757052	0.843478	0.832918	0.822058	15	36813159
cg01886593	0.00861228	-1.10006	0.564125	0.606103	0.558404	0.567299	0.59356	0.640875	0.637555	0.628105	13	52738164
cg01887388	0.00891081	-1.16682	0.454621	0.494378	0.585832	0.549234	0.52989	0.615055	0.623927	0.599833	2	81420861
cg01887468	0.00625806	-1.3936	0.25925	0.20878	0.272147	0.27196	0.249208	0.354082	0.320702	0.380252	1	179847349
cg01889020	0.00872789	-1.37552	0.041314	0.0415449	0.0328695	0.0477701	0.043003	0.0534501	0.0571741	0.0596566	15	66545863
cg01890676	0.0070156	-1.13449	0.570594	0.576706	0.5409	0.594074	0.547113	0.648662	0.607733	0.666064	5	178902790
cg01892689	0.0053885	-1.13645	0.488771	0.497347	0.481271	0.488101	0.441239	0.52354	0.554494	0.553085	8	97657072
cg01896473	0.00729619	-1.25357	0.132752	0.116769	0.120026	0.110092	0.108976	0.156147	0.135084	0.150345	8	135051797
cg01904295	0.000955704	-1.41855	0.0804971	0.0674136	0.0728631	0.0800312	0.0843875	0.113364	0.105137	0.109584	1	45285741
cg01907085	0.000751571	-1.20898	0.0946148	0.0852902	0.102048	0.0970704	0.10081	0.11882	0.11728	0.113093	15	99602004
cg01908398	0.00153782	-1.1034	0.645477	0.65435	0.605261	0.633543	0.617565	0.697817	0.664565	0.721345	22	39835407
cg01908782	0.00998124	-1.10249	0.557983	0.588376	0.544837	0.580843	0.530817	0.618446	0.603813	0.628482	15	63135469
cg01912834	0.00233252	-1.20559	0.410677	0.446922	0.396928	0.429036	0.425822	0.517749	0.478473	0.527149	14	27341908
cg01916685	0.00151015	-1.1182	0.472607	0.47214	0.448381	0.453466	0.419784	0.489815	0.494076	0.531012	22	42897250
cg01920485	0.00402541	-1.15743	0.514764	0.534364	0.540771	0.520532	0.558002	0.587043	0.637355	0.629272	20	29648327
cg01921323	0.000219775	-1.11071	0.622506	0.632644	0.558079	0.580742	0.576733	0.647588	0.637039	0.686525	7	153881192
cg01922979	0.00587776	-1.21968	0.581134	0.676379	0.603881	0.599083	0.567895	0.688935	0.761424	0.760812	7	61853231
cg01923037	0.00277811	-1.10609	0.56763	0.590132	0.57024	0.577164	0.547285	0.615563	0.613765	0.659508	11	69707384
cg01924435	0.000358367	-1.20658	0.37558	0.348623	0.331526	0.33534	0.352037	0.405597	0.410569	0.44208	4	184679625
cg01924942	0.00713427	-1.29929	0.0315107	0.0401588	0.0413879	0.0372869	0.0436405	0.0542975	0.0515584	0.0459928	16	20911133
cg01926459	0.000776161	-1.11735	0.437288	0.434684	0.416035	0.425826	0.423708	0.455286	0.471738	0.502224	11	47327440
cg01929065	0.00706654	-1.29594	0.0404458	0.0494289	0.0500627	0.0455009	0.0488718	0.0593179	0.0577894	0.0650543	12	56122634
cg01931066	0.00418389	-1.10323	0.451585	0.452891	0.471178	0.475479	0.455544	0.513683	0.493636	0.52021	3	42005380
cg01942394	0.00251438	-1.10219	0.745152	0.715669	0.682383	0.698175	0.698339	0.790897	0.747894	0.796364	16	56641998
cg01943200	0.00259021	-1.33939	0.102634	0.109475	0.120398	0.125557	0.119577	0.146365	0.153928	0.164416	11	104916095
cg01943504	0.00837213	-1.15902	0.0473722	0.0511804	0.0501089	0.0556164	0.0539176	0.0586437	0.0607188	0.0605287	12	42538901
cg01945353	0.00524704	-1.42242	0.0581528	0.0674928	0.0472009	0.0575143	0.0554941	0.0823274	0.0858307	0.0755846	7	86781154
cg01949956	0.00564823	-1.12549	0.551826	0.61649	0.589598	0.592299	0.590073	0.660712	0.651698	0.672853	13	39216086
cg01950449	0.00702167	-1.18098	0.189785	0.189265	0.178151	0.19334	0.177455	0.208026	0.204309	0.242717	13	30070490
cg01953482	0.00228295	-1.12193	0.65936	0.687403	0.630852	0.629489	0.66829	0.711854	0.741227	0.747351	5	176107734
cg01960789	0.00430137	-1.41141	0.0385115	0.0519267	0.0475447	0.0421444	0.0469075	0.0684411	0.0638592	0.0601429	16	3184957
cg01960926	0.00667648	-1.40672	0.0962493	0.0777057	0.0811492	0.0840639	0.092316	0.136932	0.114067	0.113465	10	21463412
cg01962086	0.00498086	-1.1591	0.175969	0.169813	0.17032	0.15213	0.166079	0.187674	0.181999	0.208298	3	195637027
cg01963633	0.00809877	-1.24478	0.540043	0.505486	0.58512	0.469465	0.545295	0.646388	0.642033	0.686309	6	30079177
cg01964944	0.00210414	-1.54138	0.0504246	0.0570503	0.0526562	0.0745801	0.0618394	0.0936191	0.0973101	0.083711	18	33952910
cg01965477	0.00202958	-1.43561	0.114587	0.114437	0.125117	0.104853	0.103423	0.167736	0.143719	0.172428	17	35285295
cg01965497	0.00298087	-1.10387	0.664889	0.679388	0.686549	0.665829	0.651091	0.727003	0.717613	0.769355	18	59518092
cg01966891	0.00138258	-1.35424	0.378406	0.320642	0.351121	0.298166	0.338326	0.452181	0.456204	0.460657	15	95870990
cg01967564	0.00882534	-1.12809	0.479257	0.523676	0.519684	0.519289	0.506941	0.550219	0.594406	0.581484	16	27078517
cg01973394	0.000544623	-1.1257	0.587338	0.590252	0.588581	0.604895	0.571638	0.677064	0.658892	0.652458	15	82335947
cg01976303	0.00121079	-1.11174	0.682797	0.683812	0.684049	0.690292	0.71297	0.755968	0.758874	0.788554	16	89393185
cg01978215	0.00955333	-1.5261	0.115327	0.0746295	0.0870748	0.114025	0.088477	0.153529	0.137295	0.148264	2	145078303
cg01978558	0.00258036	-1.45128	0.0901256	0.0865795	0.0824196	0.0945256	0.0853175	0.11075	0.137583	0.133647	8	93114437
cg01978826	0.00573583	-1.44578	0.0476044	0.0668914	0.0664637	0.0596906	0.0681441	0.084968	0.0887458	0.0942999	6	158589721
cg01984872	0.00912321	-1.10659	0.57165	0.582511	0.549463	0.538948	0.506522	0.61656	0.582048	0.620486	6	157954806
cg01986131	0.00224281	-1.19764	0.325302	0.325847	0.304219	0.298085	0.289824	0.385361	0.344346	0.37615	17	42092588
cg01992590	0.00757673	-1.21895	0.273142	0.290699	0.267472	0.295481	0.291949	0.37711	0.32847	0.333249	17	48277042
cg01995815	0.00404886	-1.13324	0.622024	0.631608	0.569082	0.572267	0.599061	0.689869	0.629721	0.708604	3	139984238
cg01995852	0.00814733	-1.14959	0.622933	0.566545	0.561215	0.5882	0.566384	0.674722	0.62019	0.703627	7	138350700
cg01997606	0.00663995	-1.16943	0.63138	0.618193	0.632827	0.624324	0.587316	0.664256	0.729935	0.771833	5	151308141
cg01998750	0.00414835	-1.35112	0.0572413	0.0559693	0.0586794	0.0623944	0.0569173	0.0869482	0.0704532	0.0788295	3	69434842
cg01999295	0.00944122	-1.11286	0.528726	0.522468	0.536579	0.529428	0.526321	0.562423	0.571532	0.628088	3	75834381
cg02003233	0.00253013	-1.53569	0.108553	0.073105	0.110534	0.0959259	0.0965708	0.153299	0.147826	0.145796	6	28234680
cg02004275	0.00680318	-1.40724	0.0879922	0.108888	0.116723	0.10211	0.092694	0.147229	0.158337	0.124755	20	47662408
cg02008423	0.00661428	-1.15693	0.362554	0.376705	0.391222	0.404986	0.366603	0.437698	0.426897	0.456201	3	184445561
cg02010772	0.000456127	-1.18637	0.0938472	0.0872118	0.0944647	0.0898894	0.0888959	0.107768	0.107347	0.108286	16	58284274
cg02010977	0.00436115	-1.12626	0.603691	0.621193	0.631058	0.654549	0.625247	0.704545	0.684431	0.730486	15	96705563
cg02012159	0.00712623	-1.14514	0.613739	0.604187	0.543511	0.608496	0.537976	0.631177	0.648512	0.709797	1	229477078
cg02014830	0.000215236	-1.11942	0.707608	0.715005	0.678942	0.691823	0.659137	0.756799	0.769856	0.787175	7	127914745
cg02016195	1.25581e-06	-1.1157	0.582086	0.576772	0.605385	0.60028	0.606426	0.676503	0.672914	0.643833	9	132198822
cg02019118	0.00388122	-1.26846	0.0510087	0.0587767	0.0600674	0.0580245	0.0525382	0.0704655	0.0759181	0.0674313	19	2235924
cg02019955	0.0041777	-1.13333	0.485825	0.523292	0.530928	0.531788	0.541779	0.590872	0.583085	0.605354	9	80816683
cg02020530	0.00217946	-1.24688	0.0916855	0.101796	0.104753	0.105407	0.101474	0.11932	0.130117	0.128846	9	99638069
cg02028388	0.000980054	-1.18664	0.343374	0.35026	0.338266	0.342849	0.320936	0.384386	0.386689	0.432622	1	239750658
cg02031359	0.0086392	-1.2044	0.327395	0.304829	0.339156	0.354313	0.311865	0.395146	0.37447	0.413999	5	178367423
cg02032552	1.38817e-05	-1.35345	0.0851211	0.0828673	0.0783208	0.0808858	0.0825714	0.106184	0.109904	0.116192	8	27629759
cg02032970	0.00926701	-1.12376	0.549537	0.539801	0.51762	0.531923	0.475135	0.58693	0.554362	0.614837	17	9885713
cg02033207	0.00475691	-1.14265	0.632747	0.582781	0.615927	0.628802	0.57249	0.693365	0.689693	0.69573	19	13257716
cg02034293	0.00749838	-1.10943	0.665728	0.682291	0.689274	0.711167	0.71765	0.762851	0.749689	0.795786	19	2431468
cg02039732	0.00777492	-1.11394	0.632724	0.651183	0.663109	0.6777	0.672508	0.705656	0.736842	0.761941	3	73039895
cg02045669	0.00393743	-1.17945	0.304977	0.306533	0.330972	0.296754	0.290831	0.361808	0.371664	0.350218	4	87514906
cg02050028	0.00798575	-1.17562	0.66884	0.716672	0.687293	?	0.713836	?	0.822844	0.815177	7	43156037
cg02053568	0.00380182	-1.1854	0.153556	0.147833	0.148563	0.156024	0.156673	0.191081	0.169958	0.181616	5	171702196
cg02055998	0.000649939	-1.1664	0.113755	0.121482	0.115952	0.113888	0.109232	0.133724	0.13009	0.137374	19	35634093
cg02056144	0.000116108	-1.49965	0.0659507	0.0749803	0.0765499	0.0808372	0.0813539	0.112394	0.113905	0.115575	12	54070517
cg02057239	0.00185987	-1.10021	0.270613	0.281624	0.256107	0.262333	0.256503	0.281558	0.278034	0.312577	16	67868085
cg02063076	0.00312447	-1.10807	0.630834	0.658397	0.611393	0.649544	0.61296	0.703169	0.699437	0.698392	19	41881163
cg02063828	0.00391558	-1.26901	0.0393448	0.0384799	0.0473776	0.0458327	0.0458202	0.0517922	0.0590488	0.054867	2	64371766
cg02064338	0.00700016	-1.20976	0.0414357	0.0416667	0.0499906	0.0478397	0.0508181	0.053821	0.0588019	0.0563	14	59951321
cg02066331	0.00436172	-1.10612	0.534949	0.545142	0.50308	0.470158	0.512072	0.543118	0.544397	0.606446	6	17282778
cg02069738	0.00323903	-1.4227	0.0965928	0.118512	0.0827002	0.0889001	0.105222	0.127376	0.132338	0.158732	2	15702002
cg02072230	0.0093661	-1.20585	0.0827603	0.0822737	0.0763615	0.0762931	0.0705767	0.100219	0.086444	0.0935218	9	110227894
cg02073669	0.000585963	-1.16127	0.40624	0.433123	0.408819	0.41438	0.400267	0.461479	0.481975	0.491619	20	40302163
cg02075020	0.00340342	-1.11341	0.696798	0.680205	0.651928	0.676998	0.690875	0.727311	0.774694	0.764779	19	24140591
cg02080152	0.00981208	-1.10874	0.447839	0.497256	0.461556	0.44405	0.45451	0.508647	0.50722	0.515162	1	55967678
cg02082588	0.00708454	-1.66332	0.0742341	0.0559787	0.0665362	0.0857967	0.0635718	0.107015	0.136966	0.101455	3	130569372
cg02084834	0.00651858	-1.24233	0.0834298	0.0807934	0.0930702	0.0880974	0.092933	0.102998	0.107524	0.116452	2	201983708
cg02086722	0.00396704	-1.33621	0.323364	0.317168	0.349712	0.377798	0.318101	0.45716	0.416591	0.478401	1	57684724
cg02092616	0.000938642	-1.14582	0.511786	0.532041	0.472348	0.504109	0.472573	0.564318	0.546541	0.596743	14	105154749
cg02093333	0.00743837	-1.15123	0.648408	0.708494	0.710966	0.680739	0.680585	?	0.792836	0.783662	18	62142192
cg02099030	0.00210133	-1.10778	0.53489	0.522901	0.545808	0.551983	0.553268	0.590404	0.595779	0.615285	1	143187708
cg02101882	0.00224335	-1.16578	0.553302	0.555917	0.507053	0.54652	0.554355	0.600587	0.644869	0.651748	20	14932324
cg02104434	0.00944243	-1.38673	0.55183	0.751213	0.629965	0.508198	0.510155	0.781734	0.761306	0.903152	1	247694406
cg02104618	0.00631519	-1.46004	0.103719	0.149408	0.119569	0.10716	0.126075	0.177292	0.184053	0.16936	8	142529245
cg02104700	0.00830898	-1.51604	0.0642733	0.0610042	0.0675039	0.0701049	0.0558929	0.105991	0.0789577	0.104875	4	6698168
cg02109988	0.00629554	-1.1093	0.674346	0.666919	0.61723	0.651163	0.587577	0.701899	0.683169	0.734834	1	234792752
cg02111256	0.00235282	-1.45009	0.104489	0.114892	0.102652	0.128818	0.111318	0.179033	0.154208	0.156307	12	62604283
cg02111655	0.00315293	-1.14456	0.0669421	0.0643358	0.0615614	0.0671788	0.0619109	0.0712527	0.0720201	0.0772818	10	30338246
cg02112038	0.00357483	-1.10282	0.757353	0.758307	0.736058	0.7656	0.74024	0.791354	0.821565	0.868532	7	57076863
cg02114168	0.00591485	-1.11227	0.656718	0.662855	0.695539	0.686472	0.672334	0.735608	0.733698	0.78217	2	118294899
cg02116889	0.00395932	-1.20948	0.0569273	0.0602863	0.0593096	0.0523346	0.0561357	0.0636754	0.0687589	0.0737756	5	130971738
cg02117704	0.00102555	-1.13513	0.742642	0.76001	0.771421	0.74932	0.728765	0.855454	0.823319	0.874577	4	190234966
cg02121330	0.00422315	-1.17704	0.119915	0.119618	0.114994	0.11704	0.113988	0.125409	0.142141	0.144976	14	61788107
cg02121547	0.00047679	-1.16834	0.366408	0.378199	0.363852	0.358733	0.387419	0.43674	0.431066	0.432152	11	113649020
cg02123704	0.00925613	-1.17861	0.439805	0.474064	0.432424	0.459455	0.457161	0.548765	0.485783	0.56265	6	135613063
cg02126307	0.0098151	-1.20883	0.023166	0.0247372	0.021815	0.0239376	0.0238769	0.0282306	0.0307302	0.0263723	1	228296788
cg02127365	0.000662898	-1.11506	0.741381	0.723864	0.744715	0.732872	0.735895	0.806688	0.804754	0.847828	9	122127745
cg02141570	5.46176e-05	-1.10592	0.425685	0.435686	0.425155	0.420744	0.415226	0.461591	0.466667	0.478169	3	197808633
cg02142558	0.00199113	-1.53025	0.0562613	0.0767884	0.0794186	0.0774949	0.0819413	0.124923	0.125435	0.0919374	1	171454152
cg02142669	0.0013026	-1.11422	0.626938	0.638695	0.642039	0.656723	0.670797	0.71008	0.72282	0.731558	6	168680476
cg02144516	0.00189071	-1.13261	0.57799	0.565988	0.557692	0.569548	0.522014	0.623519	0.613601	0.656602	1	1311909
cg02147292	0.00810601	-1.14149	0.583231	0.654443	0.631235	0.637486	0.663468	0.705631	0.746294	0.721887	11	130286439
cg02148034	0.00930955	-1.26303	0.0527446	0.0664639	0.0647616	0.0655871	0.066563	0.0770565	0.0793689	0.0833824	14	54430529
cg02151312	0.0042247	-1.1546	0.07241	0.0740279	0.0751931	0.0771558	0.0771987	0.0936182	0.084204	0.0832806	17	70553251
cg02152091	0.00803356	-1.12398	0.639257	0.660862	0.659069	0.672155	0.651646	0.694947	0.744384	0.772731	8	1270761
cg02152996	0.000476439	-1.10422	0.647899	0.634183	0.667365	0.685361	0.667489	0.731378	0.731713	0.728483	13	112687960
cg02153806	0.00261026	-1.17725	0.30667	0.327578	0.351723	0.361456	0.341051	0.388949	0.422036	0.385935	7	96641232
cg02155647	0.00696162	-1.11724	0.622841	0.628169	0.606995	0.557071	0.558016	0.641268	0.667982	0.676972	3	172233120
cg02157872	0.00289545	-1.11998	0.473092	0.492078	0.470674	0.462999	0.475986	0.550131	0.529079	0.516653	16	19180934
cg02158499	0.00219092	-1.12366	0.0806467	0.0865376	0.0816429	0.0798501	0.0773252	0.0908607	0.0893581	0.0929256	19	54960210
cg02160872	0.00367789	-1.13062	0.652477	0.672926	0.674806	0.615684	0.647513	0.742679	0.709792	0.757793	5	212506
cg02166351	0.00773871	-1.10075	0.641462	0.633171	0.65549	0.655864	0.683549	0.699283	0.721624	0.739694	20	44270867
cg02169391	0.00432735	-1.25935	0.0943672	?	0.0998946	0.103153	0.107582	0.13741	0.124171	0.11561	7	130126176
cg02169538	0.00854999	-1.11807	0.638208	0.609923	0.597921	0.638511	0.571311	0.678574	0.666381	0.701098	9	91604734
cg02171688	0.00652998	-1.20769	0.162438	0.15062	0.150273	0.13472	0.134042	0.18236	0.17072	0.175942	19	13068299
cg02171705	0.00085416	-1.24149	0.0534273	0.0493013	0.0490819	0.0509981	0.051664	0.0621818	0.0663905	0.0610655	X	9431181
cg02174341	0.00922876	-1.1052	0.596264	0.625558	0.611383	0.602066	0.622836	0.679743	0.640852	0.704753	10	13276466
cg02177891	0.00572531	-1.13844	0.612326	0.556602	0.560604	0.547593	0.523596	0.607084	0.635616	0.663837	22	45386407
cg02177982	0.00965195	-1.25706	0.137193	0.141135	0.109606	0.116359	0.127313	0.133502	0.162623	0.177281	2	39455365
cg02178433	0.00035732	-1.26676	0.307509	0.313802	0.300317	0.315354	0.335752	0.396146	0.389726	0.409288	2	121427490
cg02179982	0.00873712	-1.16039	0.567338	0.65708	0.591692	0.595598	0.628728	0.715546	0.693014	0.707461	22	46365647
cg02182354	0.0082667	-1.1861	0.0931743	0.0838163	0.0834573	0.0868719	0.0821045	0.0993017	0.0928587	0.112209	4	113437522
cg02182444	0.000417425	-1.1906	0.593316	0.643477	0.610251	0.645353	0.630748	0.743029	0.745636	0.743383	14	32281481
cg02184280	0.00770776	-1.25001	0.0733797	0.0817493	0.0796731	0.0817601	0.0816327	0.0957265	0.111791	0.091936	19	49954649
cg02193584	0.00144779	-1.12556	0.586952	0.606898	0.543217	0.555471	0.55769	0.625849	0.59824	0.691499	2	27164591
cg02193650	0.0092847	-1.17405	0.0626501	0.0656065	0.0692264	0.0684688	0.0618809	0.0784505	0.0727187	0.0797734	12	49374710
cg02196734	0.00527757	-1.25569	0.087102	0.105133	0.104984	0.109343	0.108738	0.124379	0.137281	0.127633	15	75018032
cg02197034	0.00736954	-1.25886	0.23537	0.22539	0.23584	0.266974	0.232293	0.293486	0.284713	0.324658	5	52084350
cg02198983	0.00267494	-1.29285	0.0582053	0.0503876	0.0578449	0.0560741	0.0626138	0.0742997	0.0710864	0.0759845	2	201936430
cg02201052	0.000882308	-1.1032	0.601111	0.596712	0.625182	0.622617	0.59906	0.66709	0.670546	0.67891	11	73357741
cg02201745	0.000182382	-1.1148	0.745941	0.751609	0.746121	0.757799	0.738354	0.816254	0.82788	0.855243	13	68778084
cg02201766	0.00323706	-1.13707	0.443334	0.473714	0.458575	0.439706	0.448331	0.493906	0.501083	0.545653	5	131892446
cg02209504	0.00771667	-1.24456	0.0626984	0.0607454	0.0699259	0.06782	0.0798551	0.0910112	0.0825495	0.0821974	10	64576388
cg02212027	0.00862228	-1.24286	0.102095	0.107071	0.0978913	0.106061	0.0896331	0.121579	?	0.130168	2	8125085
cg02216061	0.00820885	-1.11247	0.569869	0.57648	0.612579	0.584828	0.557221	0.638596	0.633851	0.663536	16	30008249
cg02220008	0.00689207	-1.16356	0.52963	0.535165	0.504951	0.534538	0.4758	0.624389	0.569085	0.604696	6	13192742
cg02221303	0.00359233	-1.213	0.133399	0.122231	0.127265	0.130337	0.126627	0.143062	0.159249	0.162834	11	118827529
cg02221753	0.00335631	-1.17431	0.0686225	0.0772714	0.0856639	0.0840874	0.0791557	0.0957814	0.0956515	0.088093	15	62352771
cg02221805	0.00658535	-1.67387	0.0771375	0.0828548	0.0943466	0.0930671	0.101274	0.158266	0.186916	0.105364	3	160166812
cg02222670	0.00556662	-1.21006	0.378326	0.439707	0.461933	0.416454	0.445116	0.548963	0.519134	0.491643	2	157753228
cg02225085	0.00941438	-1.31319	0.120726	0.1082	0.105213	0.131368	0.102004	0.151471	0.155651	0.140415	5	87975992
cg02226666	0.00810415	-1.3088	0.0883057	0.104578	0.0997711	0.105301	0.103753	0.126632	0.121394	0.145579	7	107384386
cg02228118	0.00532448	-1.18392	0.537419	0.513453	0.511219	0.535018	0.47896	0.634204	0.571843	0.621342	1	46686657
cg02232377	0.00765373	-1.1285	0.611262	0.574938	0.574351	0.617867	0.584505	0.643229	0.692619	0.670132	7	86297084
cg02235959	0.000624698	-1.16768	0.475219	0.46333	0.487572	0.495939	0.48177	0.542891	0.579929	0.563072	16	34213955
cg02236776	0.0096091	-1.10993	0.530496	0.588723	0.558804	0.562704	0.556137	0.603106	0.620984	0.636981	10	127836008
cg02238069	0.00736794	-1.25576	0.0901691	0.0937175	0.107056	0.101451	0.122891	0.130388	0.132994	0.126555	12	2904101
cg02238747	0.00514286	-1.32045	0.0844361	0.0775442	0.0647999	0.0645676	0.073442	0.102048	0.0852635	0.10055	10	99161279
cg02239163	0.00250674	-1.15033	0.392135	0.360045	0.406583	0.433925	0.422785	0.475373	0.472447	0.449103	4	7720084
cg02245612	0.00350054	-1.27307	0.0951858	0.0974071	0.0879608	0.103975	0.0872399	0.125087	0.117614	0.117569	19	5293611
cg02246645	0.002092	-1.22515	0.0671028	0.0733423	0.071965	0.0793328	0.0719786	0.0875589	0.0896912	0.0903923	12	103352235
cg02247131	0.000495183	-1.14802	0.458726	0.444242	0.425144	0.422512	0.427158	0.49239	0.508007	0.497198	3	158786035
cg02247582	0.00669663	-1.53349	0.047727	0.0591362	0.0728317	0.0595102	0.0662277	0.110741	0.0852066	0.0855831	2	27806117
cg02247617	0.00752516	-1.15564	0.304178	0.346217	0.339733	0.318994	0.339065	0.377314	0.377083	0.388533	1	112380213
cg02249473	0.00778386	-1.15615	0.0798403	0.0732762	0.0732147	0.0676013	0.0660434	0.0836666	0.0785427	0.0864614	8	21881551
cg02249490	0.00130408	-1.33592	0.102239	0.0882007	0.0973129	0.0928489	0.0840583	0.12526	0.125764	0.12133	17	42004878
cg02250787	0.00782939	-1.4265	0.074923	0.0804077	0.0907609	0.0947351	0.0878144	0.107777	0.1427	0.117226	13	47470989
cg02252925	0.00314226	-1.11007	0.438061	0.434307	0.4045	0.440925	0.425294	0.470837	0.463996	0.489855	8	42065274
cg02255844	0.00293369	-1.30157	0.106519	0.112531	0.116048	0.12284	0.106486	0.151603	0.13603	0.153178	6	114662458
cg02256928	0.00999876	-1.10682	0.514413	0.517683	0.505773	0.540664	0.511788	0.571057	0.547895	0.59923	4	71715356
cg02257793	0.00471061	-1.31617	0.177082	0.193541	0.194165	0.21238	0.185396	0.272431	0.231628	0.256717	5	151303847
cg02264567	0.00445074	-1.17032	0.100608	0.0893612	0.0948772	0.0954468	0.0898428	0.110131	0.105696	0.113831	1	156863732
cg02266849	0.0095491	-1.1984	0.4915	0.51202	0.525823	0.518496	0.568193	0.584862	0.63814	0.658875	19	17621073
cg02268013	0.000931667	-1.1986	0.34334	0.335575	0.321432	0.34312	0.313288	0.400066	0.376306	0.412652	9	71650331
cg02268424	0.00544031	-1.24886	0.0999774	0.109505	0.113557	0.0958448	0.0980196	0.129525	0.133766	0.124184	19	12274129
cg02269477	0.00246498	-1.14006	0.479939	0.486004	0.473271	0.499112	0.469065	0.528463	0.537754	0.577753	9	121080737
cg02273398	0.0081713	-1.24144	0.17548	0.176565	0.123829	0.157863	0.143082	0.191636	0.175539	0.207535	6	50817400
cg02273535	0.000926741	-1.47539	0.0485551	0.0428526	0.0480736	0.0431609	0.0417798	0.0613314	0.0711655	0.0661207	5	32585547
cg02276107	0.00042835	-1.2215	0.0872559	0.088244	0.0886575	0.093161	0.0982525	0.110969	0.113139	0.110342	5	61699841
cg02278073	0.00392033	-1.31121	0.122104	0.113755	0.118751	0.126284	0.111586	0.142172	0.150051	0.172939	17	34068571
cg02278335	0.00728723	-1.25593	0.0554628	0.054816	0.0622196	0.0668255	0.062201	0.0712808	0.076784	0.0795892	15	89911976
cg02279465	0.00189583	-1.15158	0.594983	0.622175	0.660656	0.689299	0.637469	0.765534	0.734922	0.720729	3	158679560
cg02279759	0.0051938	-1.11178	0.576496	0.59619	0.60779	0.615044	0.582309	0.642439	0.661875	0.681966	13	21100898
cg02283570	0.00343338	-1.10891	0.623047	0.660648	0.689067	0.690053	0.70343	0.744507	0.756662	0.744534	7	97228812
cg02288165	0.00379196	-1.11753	0.683504	0.721083	0.712497	0.694266	0.688191	0.748944	0.778379	0.815702	20	3687992
cg02289117	0.00204343	-1.21419	0.460863	0.447484	0.452931	0.403304	0.423596	0.499017	0.508139	0.580816	6	85577368
cg02289722	0.00301803	-1.12206	0.67241	0.648174	0.650575	0.6417	0.641349	0.722634	0.689099	0.773524	22	36545519
cg02292520	0.000972104	-1.33405	0.11576	0.106895	0.0986308	0.0943548	0.0833687	0.131619	0.128432	0.137858	9	90112176
cg02298472	0.00592102	-1.1321	0.60005	0.639246	0.642757	0.607799	0.58149	0.679013	0.688172	0.716261	3	55513773
cg02299602	0.00874659	-1.10137	0.654705	0.636105	0.644808	0.644292	0.62948	0.726429	0.66727	0.72481	5	10293612
cg02300114	0.00100378	-1.11165	0.706643	0.68866	0.702453	0.687729	0.717744	0.759001	0.786329	0.790737	12	130604047
cg02303121	0.000311351	-1.15724	0.593855	0.601529	0.591814	0.617015	0.603252	0.712132	0.675925	0.700435	22	45139691
cg02311275	0.00712354	-1.10452	0.636278	0.62691	0.612806	0.595851	0.570979	0.677897	0.67113	0.66397	4	84277683
cg02317742	0.000912761	-1.25949	0.0648351	0.0725595	0.0713741	0.0699469	0.0650685	0.0839929	0.0875282	0.0881767	2	85981021
cg02318968	0.00196536	-1.35692	0.0427764	0.0543937	0.0591727	0.0651136	0.0591116	0.078151	0.082811	0.068606	16	11490273
cg02319142	0.00430513	-1.38546	0.0622411	0.0553395	0.061588	0.0689289	0.0727194	0.0818035	0.0932508	0.0919854	5	149339858
cg02319741	0.00796878	-1.31118	0.0415937	0.0343977	0.039332	0.0402004	0.0399667	0.0457667	0.0528306	0.0551012	18	47901255
cg02321115	0.00786574	-1.15336	0.665879	0.59693	0.596937	0.62831	0.569986	0.686062	0.711288	0.714709	21	15140955
cg02321871	0.00291722	-1.43676	0.0435673	0.0443804	0.0524557	0.0510373	0.0416377	0.0719811	0.0730114	0.0565229	13	50159138
cg02323699	0.00713366	-1.10411	0.622005	0.661237	0.668872	0.66381	0.668375	0.703977	0.729644	0.743271	11	113135432
cg02326883	0.00787945	-1.12009	0.49028	0.471589	0.514801	0.490894	0.462509	0.54478	0.536911	0.551711	17	37820254
cg02329670	0.00620227	-1.15897	0.509519	0.483734	0.446919	0.4993	0.451866	0.547123	0.519738	0.589969	17	6921400
cg02330106	0.0058067	-1.12494	0.592825	0.610211	0.600074	0.582792	0.604768	0.630648	0.676735	0.707497	10	131264840
cg02333645	0.00605512	-1.11393	0.486697	0.518841	0.50478	0.513221	0.490793	0.553157	0.540313	0.584771	6	126179986
cg02334722	0.00430359	-1.50018	0.0797735	0.082255	0.0996588	0.0952791	0.0751076	0.137502	0.116097	0.13545	11	44342177
cg02337566	0.00880177	-1.19435	0.15285	0.153543	0.179519	0.172096	0.17034	0.190763	0.197266	0.206818	15	45405789
cg02339674	0.000242466	-1.4267	0.051774	0.0525207	0.0498073	0.0491889	0.049683	0.075798	0.0658248	0.0747084	1	59247603
cg02343648	0.00513125	-1.46658	0.050338	0.0419093	0.0615008	0.0431436	0.0552612	0.0791924	0.0769915	0.0662282	10	102133165
cg02345556	0.00855806	-1.69903	0.0908661	0.0830922	0.0648419	0.0780588	0.103151	0.155689	0.158374	0.113985	4	139859683
cg02347487	0.00407439	-1.14182	0.514164	0.521589	0.582726	0.575145	0.577964	0.621347	0.643745	0.639459	11	7059103
cg02347859	0.00309305	-1.11206	0.733738	0.719449	0.724597	0.773911	0.722407	0.840263	0.820477	0.794357	20	3762520
cg02349866	0.00683923	-1.10505	0.652346	0.708856	0.687012	0.712848	0.691235	0.749279	0.772528	0.768496	15	90391877
cg02354275	0.000879845	-1.39067	0.0198174	0.0221054	0.0223796	0.0227358	0.0207509	?	0.0306462	0.0289823	9	32550955
cg02355442	0.00909415	-1.10196	0.721299	0.708554	0.686855	0.692906	0.651232	0.782382	0.728078	0.772594	7	137693519
cg02357464	0.00594535	-1.12719	0.789996	0.720975	0.7158	0.693369	0.669066	0.799316	0.785346	0.833835	4	184988419
cg02362381	0.00910691	-1.42235	0.0599206	0.0442337	0.0459422	0.0463931	0.044254	0.0725277	0.0580174	0.0743619	5	52083164
cg02364584	0.00525546	-1.12936	0.579	0.537281	0.608929	0.573065	0.597791	0.686022	0.678835	0.605631	7	83824971
cg02364642	0.00045041	-1.11107	0.304955	0.300706	0.275837	0.275823	0.285317	0.316446	0.304245	0.336895	12	58005758
cg02370551	0.00121628	-1.25977	0.153588	0.151668	0.148352	0.159741	0.153715	0.192006	0.180163	0.206822	19	893230
cg02370877	0.00292395	-1.22915	0.160523	0.179668	0.155782	0.16325	0.145579	0.198342	0.184209	0.208875	8	76316876
cg02371080	0.00204041	-1.30131	0.182472	0.190434	0.165346	0.191362	0.172791	0.219062	0.221425	0.261772	14	22012326
cg02372048	0.00960403	-1.11075	0.528858	0.578771	0.556307	0.54183	0.574723	0.602834	0.620738	0.628876	20	22672807
cg02373435	0.00590252	-1.2382	0.0488881	0.0510039	0.0457143	0.0458848	0.0443612	0.0501784	0.0579441	0.0661594	4	57253264
cg02373784	0.00202113	-1.2528	0.138529	0.139123	0.139665	0.148385	0.137995	0.176362	0.163613	0.188415	4	13537302
cg02375503	0.00899912	-1.22646	0.215049	0.218302	0.18847	0.179636	0.216768	0.259598	0.234885	0.252701	15	69591110
cg02378183	0.00127056	-1.13225	0.549207	0.525496	0.547137	0.559023	0.52134	0.608173	0.608942	0.618578	10	99474878
cg02379352	0.0012593	-1.10454	0.734153	0.718066	0.7209	0.696807	0.723586	0.792189	0.766045	0.819497	2	100289284
cg02382532	0.00999554	-1.18646	0.501508	0.479126	0.495355	0.516778	0.442669	0.610508	0.561123	0.562783	6	42110867
cg02383302	0.00534257	-1.24041	0.0690568	0.0809441	0.0756785	0.0777627	0.0859089	0.0952915	0.101155	0.0939158	3	138313326
cg02384984	0.00142681	-1.18668	0.396589	0.435995	0.393699	0.398113	0.42474	0.486045	0.481743	0.489909	22	27950783
cg02385760	0.00109341	-1.36709	0.0410374	0.0486891	0.0462207	0.0490494	0.0495612	0.0624771	0.063021	0.0669609	7	64499475
cg02387612	0.00781994	-1.10695	0.769254	0.725738	0.743947	0.762682	0.719094	0.789651	0.835522	0.84356	11	55889797
cg02388751	0.00457077	-1.13816	0.487788	0.524327	0.501178	0.53671	0.509644	0.566523	0.582892	0.59823	1	16357634
cg02389859	0.0020122	-1.11686	0.636232	0.66988	0.668158	0.663086	0.661622	0.746596	0.713054	0.750992	5	1201691
cg02390933	0.000488889	-2.44501	0.0349887	0.0125698	0.0406404	0.0486207	0.046567	0.0992178	0.0876693	0.077593	1	221051569
cg02392359	0.00143634	-1.3984	0.20131	0.187203	0.232068	0.233914	0.207048	0.284269	0.29819	0.309259	15	55572079
cg02392619	0.00266424	-1.18955	0.118235	0.126753	0.111533	0.125994	0.118634	0.145079	0.142091	0.14164	1	213124630
cg02393521	0.00693464	-1.11242	0.789827	0.837985	0.836296	0.786054	0.8528	0.914437	0.898891	0.925284	16	29239889
cg02393640	0.00262134	-1.25758	0.410916	0.421784	0.490906	0.417584	0.465747	0.543739	0.586562	0.539365	7	135660101
cg02397368	0.00502733	-1.10034	0.779774	0.75602	0.723456	0.738172	0.749039	0.835274	0.778275	0.853644	5	2564206
cg02399645	0.00490579	-1.5449	0.0641004	0.0686289	0.0580274	0.069495	0.068867	0.0836108	0.110976	0.110295	5	146833937
cg02400001	0.00436164	-1.17332	0.543806	0.548382	0.550674	0.564521	0.527812	0.595714	0.65416	0.67327	11	26589503
cg02400308	0.00673253	-1.11121	0.639459	0.697156	0.646281	0.642265	0.663892	0.702748	0.724344	0.761101	5	160048139
cg02400967	0.00475994	-1.14606	0.682046	0.707367	0.676281	0.632577	0.644532	0.773468	0.778904	0.743701	2	71918254
cg02405476	0.00105027	-1.31416	0.242804	0.258901	0.253544	0.274978	0.254416	0.328163	0.366737	0.319768	20	44441818
cg02407785	0.00366215	-1.28823	0.0316095	0.0291054	0.0352009	0.0358638	0.0380821	0.0438426	0.042849	0.0449751	13	67804285
cg02409878	0.000581318	-1.41162	0.117106	0.139396	0.123363	0.121411	0.134131	0.177117	0.186757	0.174409	8	99960498
cg02416986	0.00762438	-1.13177	0.727795	0.681789	0.678278	0.673771	0.622452	0.772416	0.756025	0.764731	1	44446201
cg02427266	0.00432139	-1.12831	0.704449	0.676163	0.701644	0.714381	0.676212	0.751921	0.778775	0.818066	15	45638559
cg02428941	0.00245589	-1.14116	0.456575	0.429799	0.409052	0.434536	0.403515	0.464633	0.477169	0.513778	1	95393403
cg02429905	0.00776491	-1.26738	0.337335	0.290749	0.302466	0.329971	0.263813	0.37989	0.389147	0.388748	6	32119944
cg02433272	0.00644095	-1.16346	0.504258	0.492723	0.485402	0.526078	0.48281	0.54201	0.583251	0.611177	2	79748939
cg02435573	0.00584327	-1.28538	0.125544	0.159403	0.139114	0.130689	0.14551	0.182783	0.177641	0.179375	1	94712239
cg02438545	0.000961228	-1.13319	0.583445	0.570864	0.522857	0.565602	0.552053	0.624456	0.626673	0.644879	9	99380444
cg02445852	0.00295628	-1.1593	0.640505	0.659595	0.663203	0.669589	0.692601	0.734797	0.778998	0.799483	2	239750266
cg02447229	0.00627667	-1.37156	0.127472	0.127102	0.102831	0.134718	0.128396	0.18398	0.155792	0.170554	6	158957221
cg02449186	0.0051383	-1.26043	0.403749	0.345245	0.38951	0.367881	0.361733	0.491806	0.434705	0.485195	X	43411339
cg02449373	0.00515708	-1.26027	0.0603508	0.0649162	0.0696987	0.0663837	0.0649678	0.0838944	0.07549	0.0873732	19	49256123
cg02450164	0.00463208	-1.12874	0.47162	0.517511	0.496285	0.508885	0.486791	0.546003	0.560831	0.572653	16	66493033
cg02452586	0.0022233	-1.10647	0.778846	0.793827	0.765668	0.812025	0.794123	0.881404	0.849625	0.886825	1	233497903
cg02452692	0.00380232	-1.25715	0.409478	0.425046	0.507293	0.521691	0.518018	0.596331	0.599503	0.607867	12	56587086
cg02453462	0.000248887	-1.30356	0.137663	0.136034	0.118398	0.133854	0.119589	0.16634	0.159818	0.177286	15	73662002
cg02454220	0.00573601	-1.32562	0.0411674	0.05022	0.0473546	0.0523747	0.0498678	0.0636109	0.0599747	0.0681298	1	156163765
cg02455391	0.000188553	-1.16532	0.447251	0.453472	0.415424	0.42854	0.40046	0.481347	0.493793	0.519575	11	68786679
cg02456451	0.000609897	-1.49999	0.219084	0.210492	0.188343	0.169363	0.186721	0.287902	0.248655	0.337731	7	156871073
cg02464487	0.00610547	-1.7249	0.2726	0.286913	0.266667	0.22172	0.389452	0.454545	0.478261	0.555172	6	149806235
cg02464656	0.00983311	-1.38132	0.0578055	0.0607611	0.0647847	0.0721265	0.0574223	0.0794218	0.0822225	0.0974771	6	44214659
cg02464665	0.00140206	-1.13339	0.562687	0.572019	0.602013	0.592547	0.558107	0.650454	0.655087	0.659329	1	231156359
cg02469395	0.00892479	-1.12036	0.551044	0.555146	0.587876	0.560624	0.563418	0.622772	0.60661	0.663953	4	190642693
cg02469838	0.00407552	-1.46423	0.0551955	0.061147	0.0482134	0.0635884	0.0632722	0.090722	0.077072	0.0881425	16	54404655
cg02472077	0.00802277	-1.21578	0.583744	0.520245	0.553854	0.571742	0.478691	0.661556	0.642478	0.66924	7	40748892
cg02475131	0.00547866	-1.68144	0.0465861	0.0671073	?	0.0595473	0.0733565	0.109266	0.0995093	0.10497	7	32530222
cg02475902	4.68785e-05	-1.21112	0.40038	0.383089	0.357032	0.370925	0.352951	0.441541	0.436068	0.472762	3	195542553
cg02483661	0.00688259	-1.29228	0.0978562	0.110909	0.110194	0.108756	0.100573	0.121606	0.143011	0.144657	1	2460621
cg02484337	0.000738317	-1.33871	0.16697	0.161879	0.159195	0.175585	0.147932	0.206597	0.221881	0.222863	1	46714055
cg02487452	0.00929707	-1.21607	0.527802	0.553142	0.544209	0.570485	0.475244	0.68712	0.635925	0.626519	19	855899
cg02490708	0.00234192	-1.15572	0.0557505	0.0529661	0.0524154	0.0525245	0.0568748	0.0640514	0.0621216	0.0614695	1	147775575
cg02492918	0.000627698	-1.10246	0.665667	0.688148	0.687441	0.68156	0.682888	0.739398	0.74361	0.768886	5	132362900
cg02493217	0.00230549	-1.12356	0.602679	0.639777	0.574745	0.604878	0.601947	0.665172	0.653627	0.713778	1	42806405
cg02493486	0.000302203	-1.317	0.073159	0.0803579	0.0889354	0.0857954	0.0825194	0.107491	0.115507	0.102531	4	2044414
cg02506673	0.00800423	-1.25029	0.0538864	0.0562544	?	0.060192	0.0567754	0.0667993	0.0705753	0.0752923	5	130506614
cg02508455	0.0048349	-1.10314	0.624262	0.653244	0.628316	0.65536	0.639657	0.703909	0.681329	0.731267	11	1052601
cg02510147	0.00325505	-1.10334	0.629205	0.64024	0.648089	0.669202	0.634104	0.69175	0.723794	0.71777	9	137465154
cg02521361	0.00183578	-1.3317	0.0555263	0.064034	0.0502011	0.0588447	0.0560786	0.0728484	0.0709094	0.0830057	2	136766281
cg02524950	0.00464667	-1.52826	0.0528286	0.0594224	0.0531915	0.0546741	0.0686803	0.0937869	0.0984059	0.0730361	3	14186122
cg02526350	0.00191516	-1.12084	0.590962	0.557022	0.531278	0.559282	0.540013	0.60783	0.599621	0.654942	9	139890340
cg02530321	0.00296157	-1.1625	0.383848	0.391191	0.391812	0.415534	0.410271	0.442228	0.478726	0.470179	20	43103795
cg02533423	0.00187291	-1.35981	0.120988	0.125282	0.14086	0.135733	0.12952	0.185972	0.162284	0.1844	7	27232150
cg02534817	0.00589434	-1.32762	0.0671058	0.088821	0.0749328	0.0738758	0.0794001	0.0992803	0.105921	0.100734	9	139258410
cg02535507	0.00411953	-1.25501	0.0796453	0.0877895	0.0829834	0.084814	0.0904762	0.107439	0.0987738	0.114054	11	110166799
cg02537108	0.00916609	-1.25267	0.481637	0.559877	0.537096	0.589367	0.596312	0.704719	0.652221	0.723004	11	77907224
cg02538248	0.00490381	-1.20439	0.508001	0.533911	0.540451	0.47265	0.523081	0.592604	0.650084	0.619617	16	75045643
cg02542348	0.0019001	-1.10378	0.743665	0.734022	0.745285	0.720438	0.748066	0.792403	0.80282	0.846488	8	1294306
cg02543454	0.00370329	-1.10129	0.694514	0.692284	0.625722	0.660995	0.610892	0.713479	0.70104	0.746712	17	37054349
cg02545946	0.00446116	-1.35296	0.0895844	0.0933852	0.100614	0.0941402	0.0758205	0.115444	0.125654	0.12679	1	239568617
cg02550110	0.00374545	-1.67298	0.0636303	0.0407136	0.0577611	0.0592413	0.0602587	0.0842141	0.0946058	0.103854	10	70661008
cg02550358	0.00513864	-1.28429	0.068247	0.0834416	0.0891626	0.0863359	0.0907777	0.119591	0.105374	0.0986285	17	16120515
cg02550741	0.00358203	-1.10604	0.636782	0.631705	0.661643	0.637864	0.639428	0.682872	0.725555	0.720434	11	119554281
cg02552037	0.00936984	-1.4781	0.067941	0.0506827	0.0793929	0.065628	0.061863	0.106392	0.0874011	0.0952703	16	17570594
cg02556042	9.99081e-05	-1.23207	0.531218	0.556994	0.536159	0.551064	0.569097	0.69477	0.679156	0.657009	12	117471086
cg02556718	0.00136287	-1.32612	0.0616563	0.0719061	0.0634347	0.0603973	0.0567487	0.0792476	0.0776356	0.09214	16	29910594
cg02559101	0.00144383	-1.20953	0.449129	0.456703	0.490178	0.491387	0.465395	0.548311	0.570185	0.590051	1	240874707
cg02560265	0.00142188	-1.28837	0.519798	0.435329	0.44784	0.463162	0.463701	0.586076	0.612066	0.601359	7	75923696
cg02561726	0.000689914	-1.70988	0.0821734	0.0916104	0.0680899	0.0907605	0.0819259	0.145925	0.124771	0.154756	2	183943938
cg02562453	0.00776361	-1.10683	0.447155	0.486232	0.46304	0.472674	0.46167	0.515682	0.497883	0.532643	1	37047619
cg02562758	0.00148881	-1.1535	0.526537	0.481872	0.478498	0.496419	0.488401	0.555017	0.557274	0.594655	3	151186360
cg02566231	0.00647392	-1.36262	0.250629	0.229385	0.228014	0.282553	0.218786	0.357484	0.320881	0.311463	12	109252797
cg02570061	0.0023491	-1.21587	0.173499	0.158667	0.158303	0.16004	0.156075	0.198582	0.179594	0.208609	5	179051583
cg02574198	0.00149802	-1.22221	0.151408	0.144571	0.137503	0.15158	0.151581	0.18435	0.185388	0.171026	14	101544201
cg02575092	0.00823723	-1.28845	0.261855	0.264204	0.302055	0.267424	0.236637	0.321909	0.338574	0.368257	17	77100187
cg02575712	0.00655987	-1.18468	0.100915	0.0998642	0.0997466	0.0940411	0.0984145	0.106326	0.122612	0.12087	5	178957598
cg02577433	0.0090359	-1.29492	0.16218	0.210831	0.159635	0.177253	0.160752	0.209535	0.222837	0.241592	10	102887035
cg02580763	0.00818582	-1.12427	0.45252	0.463216	0.501084	0.484807	0.461517	0.560982	0.518075	0.518808	5	140745892
cg02581667	0.00974721	-1.33002	0.0419201	0.051011	0.0502876	0.0488568	0.0625789	0.0700943	0.0708985	0.0629789	19	39322242
cg02583536	0.00153386	-1.32339	0.0797071	0.0862306	0.0707724	0.0791833	0.082236	0.0966725	0.10211	0.116353	2	114262013
cg02587383	0.00471964	-1.10727	0.6553	0.662222	0.68145	0.650949	0.648688	0.716918	0.706935	0.764623	15	26237648
cg02593381	0.00702187	-1.1448	0.469022	0.523138	0.46594	0.441422	0.476328	0.531503	0.542439	0.55355	16	68434111
cg02595134	0.00742367	-1.13594	0.64649	0.65363	0.679991	0.682848	0.67572	0.724501	0.749655	0.80077	17	42359335
cg02599938	0.00586068	-1.24123	0.0618914	0.0764949	0.0760688	0.0761202	0.0787524	0.0988614	0.0946735	0.0827941	14	75179659
cg02603839	0.00492752	-1.14117	0.676392	0.666511	0.626445	0.605532	0.65091	0.73078	0.755948	0.718913	6	32012900
cg02604346	0.00417857	-1.11742	0.715169	0.786223	0.758019	0.757153	0.772191	0.840206	0.84351	0.856826	11	119932041
cg02609480	0.00755314	-1.28468	0.233774	0.286915	0.287233	0.286175	0.289023	0.374513	0.329552	0.363582	21	46971551
cg02609692	0.00643503	-1.2257	0.10874	0.123929	0.113569	0.113584	0.110902	0.14096	0.12632	0.151299	9	129389125
cg02614336	0.00315761	-1.12256	0.636973	0.629599	0.592485	0.644846	0.618101	0.713364	0.680668	0.706638	10	2923376
cg02618908	0.00278271	-1.39243	0.0634319	0.0694783	0.0851064	0.0810871	0.0857686	0.102757	0.124686	0.0955614	14	94596645
cg02622846	0.00428605	-1.40775	0.677509	0.664362	0.433493	0.421292	0.40496	0.711222	0.713215	0.759188	11	88096346
cg02624047	0.00685447	-1.12242	0.446962	0.419429	0.466916	0.424596	0.448115	0.498706	0.492141	0.496153	2	48756865
cg02625371	0.00967652	-1.12808	0.446477	0.4953	0.462364	0.441587	0.432676	0.518465	0.495757	0.524287	20	2727544
cg02629603	0.00384216	-1.10801	0.591321	0.547043	0.545735	0.563473	0.560096	0.605996	0.624194	0.633871	2	241172209
cg02630694	0.00387871	-1.29358	0.23992	0.301223	0.279997	0.255863	0.276486	0.343026	0.348693	0.358309	10	12236833
cg02633371	0.000654554	-1.22334	0.409511	0.435474	0.44849	0.408851	0.407507	0.510444	0.515219	0.522438	17	35298618
cg02634549	0.00240438	-1.11873	0.67736	0.662709	0.671967	0.648357	0.659303	0.707225	0.758491	0.759926	1	112912797
cg02638052	0.000640952	-1.1826	0.441467	0.460915	0.458937	0.444586	0.455455	0.543357	0.510236	0.549943	1	176501831
cg02638589	0.00961458	-1.1227	0.444082	0.424086	0.444729	0.40574	0.43189	0.495593	0.461694	0.48999	15	72477069
cg02640005	0.00184869	-1.11434	0.679572	0.679196	0.639484	0.605858	0.654683	0.716416	0.696414	0.758052	11	8832690
cg02641095	0.00833349	-1.30397	0.0767837	0.0657527	0.0682232	0.0712809	0.0591224	0.0947391	0.0819623	0.0898075	5	157170413
cg02644663	0.00225264	-1.10733	0.705682	0.711403	0.742649	0.696161	0.744255	0.79579	0.799599	0.798557	19	19380821
cg02645058	0.0040147	-1.13978	0.654082	0.687164	0.705122	0.73273	0.684482	0.774539	0.789754	0.806701	2	13448686
cg02645638	0.00892188	-1.52898	0.0325728	0.0307263	0.0368421	0.0429992	0.0478115	0.0554481	0.0560725	0.0638269	3	56921642
cg02652998	0.00466557	-1.44497	0.158853	0.223709	0.181932	0.221199	0.19325	0.279789	0.291269	0.278161	7	155261984
cg02657012	0.00751566	-1.46876	0.0732047	0.051054	0.0641562	0.0534768	0.068102	0.0859083	0.0876148	0.0993845	6	32812965
cg02659784	0.000171642	-1.11278	0.610542	0.623518	0.5924	0.609012	0.583644	0.66441	0.666807	0.681268	1	65435473
cg02665416	0.00268794	-1.22013	0.103996	0.0932401	0.0945192	0.104431	0.0925809	0.118718	0.116973	0.12181	6	28984461
cg02667154	0.00694533	-1.12949	0.583656	0.628483	0.61906	0.571087	0.623713	0.669675	0.682168	0.697461	18	35071415
cg02668729	0.00492694	-1.59781	0.0480371	0.0532024	0.0489902	0.0452861	0.0519556	0.0651883	0.0905989	0.0814088	1	41445680
cg02670096	0.00807513	-1.22262	0.0444642	0.0534577	0.0513562	0.0494604	0.0498757	0.0623256	0.0646471	0.0558752	5	172386299
cg02671860	0.00813936	-1.24613	0.194264	0.189527	0.151769	0.151145	0.149217	0.193126	0.218204	0.210128	6	27470288
cg02672737	0.00506748	-1.18346	0.229206	0.248687	0.248962	0.242519	0.247761	0.270108	0.289963	0.30366	15	72476759
cg02672936	0.00688332	-1.71289	0.0484441	0.0548523	0.0338062	0.0642044	0.0603899	0.0980335	0.0878576	0.083004	16	70414816
cg02673114	0.00908861	-1.21785	0.0647157	0.0708582	0.0655218	0.0662664	0.0714732	0.0895708	0.0838291	0.074762	1	95509099
cg02674114	0.0073209	-1.36043	0.111021	0.128	0.143566	0.153818	0.145906	0.16867	0.203665	0.18627	1	44821169
cg02680112	0.009336	-1.16441	0.492573	0.482413	0.471932	0.424203	0.494379	0.529067	0.524325	0.593348	2	58798356
cg02687417	0.00482209	-1.30303	0.0865082	0.0782197	0.0863444	0.0924557	0.102817	0.123871	0.127969	0.0989767	20	43977232
cg02688432	0.00155656	-1.15697	0.464543	0.453805	0.453986	0.476433	0.434962	0.517578	0.541674	0.525878	1	91970745
cg02698668	0.000158778	-1.22731	0.371179	0.360922	?	0.366486	0.358957	0.434556	0.442145	0.459682	19	44261472
cg02700498	9.81049e-05	-1.59716	0.0664207	0.0662461	0.0659019	0.0814187	0.0757675	0.118699	0.115706	0.106699	7	16684666
cg02703020	0.0030907	-1.87853	0.0690872	0.0650797	0.101198	0.0561949	0.090503	0.141079	0.137527	0.151668	10	9638714
cg02704608	0.00293801	-1.3274	0.116207	0.0978847	0.0937906	0.102854	0.108286	0.142051	0.139661	0.131638	8	8244658
cg02705573	8.88201e-05	-1.13303	0.407972	0.42674	0.42682	0.430097	0.42449	0.482937	0.478517	0.478264	12	56728493
cg02707033	0.00826258	-1.40741	0.202004	0.1883	0.142447	0.151876	0.167576	0.239384	0.183247	0.292692	11	84634228
cg02709937	0.00112154	-1.10177	0.67505	0.668778	0.658179	0.668658	0.660093	0.743964	0.748168	0.71079	12	57558116
cg02711647	0.00350866	-1.38623	0.0399387	0.0335788	0.0449102	0.0507165	0.0473085	0.0583457	0.0621792	0.0601008	2	45237689
cg02712011	0.00662914	-1.27511	0.365093	0.296775	0.35582	0.316366	0.353857	0.427011	0.414978	0.44903	3	141580041
cg02716252	0.00080702	-1.20837	0.0865873	0.0813626	0.0973787	0.0934237	0.0896904	0.108167	0.113113	0.10497	11	85521992
cg02721252	0.000799178	-1.11449	0.607887	0.59427	0.579703	0.609458	0.592094	0.652457	0.653077	0.686664	11	69151016
cg02723908	0.000974544	-1.51713	0.114805	0.102516	0.123477	0.110992	0.0965588	0.160951	0.158552	0.179381	8	66844034
cg02725123	0.000843666	-1.33403	0.0907526	0.0910666	0.0884503	0.107252	0.0996499	0.131806	0.12879	0.122117	3	32619278
cg02725437	0.00900021	-1.29574	0.0593469	0.0752084	0.0790186	0.0667787	0.072465	0.0958498	0.0884424	0.0904628	6	90348314
cg02728002	0.007077	-1.27832	0.0559084	0.0654688	0.0841806	0.0754706	0.0840365	0.104025	0.092398	0.0856406	3	37285071
cg02732175	0.00083533	-1.11717	0.514589	0.531797	0.486168	0.507899	0.50611	0.570441	0.549544	0.583167	5	176071543
cg02732438	0.000747582	-1.44353	0.066062	0.0669265	0.0503921	0.064007	0.0609639	0.0828503	0.0835341	0.0999373	14	45366330
cg02733803	0.00513231	-1.41327	0.151909	0.108991	0.122955	0.122441	0.111156	0.161731	0.172393	0.188308	20	43275344
cg02737759	0.00777137	-1.28732	0.0658525	0.0734314	0.0699447	0.0742215	0.0603959	0.0891813	0.0805724	0.0953	12	72057786
cg02738086	0.001045	-1.10575	0.678445	0.674831	0.652103	0.65411	0.688416	0.725162	0.733636	0.759297	22	41941494
cg02742388	0.00414638	-1.53026	0.119968	0.125695	0.157709	0.156956	0.150294	0.206449	0.203994	0.242321	11	13890828
cg02743522	0.00183924	-1.27091	0.0595137	0.0543765	0.0602367	0.0584945	0.0628314	0.0706178	0.0778386	0.0769952	6	111136488
cg02744113	0.00467633	-1.30746	0.167654	0.146695	0.165717	0.154406	0.136092	0.212264	0.192062	0.199899	2	73147030
cg02745636	0.00472233	-1.17468	0.129263	0.126357	0.137143	0.127295	0.117497	0.150318	0.149224	0.149766	14	61104571
cg02747217	0.00147322	-1.16687	0.516089	0.501258	0.514326	0.51837	0.471432	0.573422	0.592197	0.598194	1	54929576
cg02749733	0.00712837	-1.1748	0.414609	0.413771	0.380942	0.396745	0.350049	0.431771	0.421681	0.516991	7	95718092
cg02749825	0.00780236	-1.38475	0.0654606	0.0684485	0.0765391	0.0753269	0.0776058	0.120921	0.0967502	0.085467	10	76995759
cg02752500	0.00770152	-1.11519	0.509966	0.527566	0.531252	0.536562	0.499057	0.563942	0.569485	0.607203	2	493506
cg02755603	0.000974903	-1.32067	0.0465512	0.0408731	0.0422161	0.0375024	0.0385622	0.0507254	0.0542451	0.0575562	20	18548475
cg02756056	0.000473954	-1.177	0.0648721	0.0613346	0.0642471	0.0602716	0.0603204	0.0719029	0.0731277	0.0743915	6	32813582
cg02760112	0.0035951	-1.3566	0.0787594	0.0850944	0.0832432	0.0791713	0.093668	0.109435	0.106736	0.125276	6	30524248
cg02760152	0.00850933	-1.12592	0.646591	0.632801	0.695887	0.641361	0.667501	0.71463	0.743079	0.761954	1	57886427
cg02771202	0.00911944	-1.13304	0.346084	0.390981	0.352077	0.363075	0.35801	0.41531	0.394879	0.418565	11	119210291
cg02772754	0.0099087	-1.16863	0.489896	0.489001	0.566975	0.588749	0.561914	0.618114	0.637888	0.641985	22	20918630
cg02779564	0.0033083	-1.22345	0.0766604	0.0703989	0.0796678	0.0821413	0.0853318	0.0949521	0.0958814	0.0991169	8	54794348
cg02781708	0.00121486	-1.12683	0.650563	0.671038	0.651555	0.645826	0.650047	0.70118	0.746154	0.759563	11	1848691
cg02782426	0.000795021	-1.32253	0.207722	0.199386	0.193404	0.164514	0.189835	0.253825	0.235742	0.265962	3	40428986
cg02787737	0.00121083	-1.60662	0.159587	0.169409	0.199389	0.233507	0.257096	0.365423	0.317875	0.300006	11	133928346
cg02788637	0.00541044	-1.2947	0.139096	0.117213	0.112292	0.104497	0.124131	0.141914	0.156404	0.163989	7	853229
cg02788938	0.00938178	-1.33137	0.314471	0.296566	0.348251	0.255898	0.346804	0.413372	0.412564	0.422228	2	116900728
cg02791331	0.00972756	-1.14651	0.202265	0.215328	0.208612	0.187618	0.192783	0.2224	0.216129	0.250907	3	183993724
cg02795076	0.00771802	-1.2716	0.115419	0.097796	0.099735	0.106699	0.109617	0.121248	0.139014	0.142909	12	50505329
cg02796725	0.004377	-1.21962	0.0906033	0.0918652	0.0965865	0.0902539	0.0965903	0.118369	0.123038	0.100762	2	75873767
cg02797036	0.00698977	-1.31586	0.0579353	0.0684218	0.0683933	0.0697321	0.0561686	0.0872995	0.0881868	0.0781418	7	44084886
cg02799635	0.00664738	-1.14008	0.536903	0.548251	0.502401	0.555986	0.561503	0.611637	0.597896	0.638667	9	546796
cg02802060	0.00599443	-1.25131	0.0499445	0.0517647	0.0636138	0.0653379	0.0614762	0.07218	0.0737933	0.0743108	1	26947320
cg02803228	0.00643421	-1.11281	0.615251	0.633205	0.552858	0.608264	0.595234	0.640897	0.665869	0.693017	18	42777673
cg02807377	0.00985056	-1.11615	0.539382	0.547454	0.551835	0.547579	0.562281	0.589498	0.595514	0.653185	4	141567436
cg02813243	0.00992411	-1.27421	0.204473	0.213935	0.220133	0.202627	0.19084	0.260967	0.229694	0.295858	7	93204175
cg02815909	0.00201863	-1.1135	0.57977	0.59586	0.585014	0.603154	0.567607	0.650443	0.634286	0.671722	15	80880365
cg02817839	0.00704305	-1.44402	0.0218148	0.031545	0.0220371	0.0231418	0.022062	0.0305974	0.0343487	0.0392004	19	16771949
cg02822108	0.00427744	-1.174	0.632785	0.590164	0.614951	0.579482	0.550762	0.705081	0.701458	0.682488	12	126718414
cg02822663	0.00620657	-1.37339	0.036028	0.051541	0.0498765	0.0479902	0.0465477	0.0627578	0.0656687	0.06302	8	19674799
cg02823293	0.00895936	-1.12135	0.0873574	0.0778696	0.0853381	0.0814602	0.0824792	0.0943331	0.0928416	0.0918594	4	108746407
cg02826844	0.00284365	-1.26249	0.0669346	0.0721266	0.0755665	0.0810401	0.0823741	0.0940787	0.0947407	0.0981717	4	140222218
cg02828140	0.00264096	-1.19564	0.0668221	0.0689223	0.0784482	0.0700763	0.0716963	0.0842315	0.089979	0.0819168	7	20370265
cg02832485	8.39647e-05	-1.14417	0.397322	0.411499	0.398989	0.402683	0.411528	0.459955	0.457788	0.469772	3	13595054
cg02834755	0.00179611	-1.12475	0.668804	0.66538	0.637653	0.66825	0.654582	0.742835	0.704239	0.772086	11	133403621
cg02843479	0.00649783	-1.1434	0.525283	0.536866	0.524425	0.582909	0.540852	0.635335	0.600111	0.625378	15	60044452
cg02847948	0.000986814	-1.30887	0.0902392	0.0831097	0.0843557	0.0774911	0.0847445	0.108924	0.100728	0.119274	1	165325498
cg02848928	0.00422325	-1.43586	0.0266005	0.0265641	0.0233526	0.0207026	0.0200177	0.0332998	0.0265497	0.0406548	10	51827776
cg02852211	0.00228444	-1.24036	0.0704397	0.0705838	0.0809651	0.0759266	0.0794761	0.0904928	0.0938037	0.0970212	12	107487485
cg02855360	0.0035677	-1.34784	0.0485182	0.0532018	0.0447404	0.0474889	0.0458744	0.056341	0.0693453	0.0677939	5	102595549
cg02857075	0.00565767	-1.17202	0.282753	0.273926	0.287181	0.323485	0.29853	0.337112	0.351935	0.34415	17	57910474
cg02857760	0.00452608	-1.28374	0.213259	0.238246	0.253091	0.232946	0.237885	0.277297	0.311419	0.316874	2	177012562
cg02858253	0.00809082	-1.10108	0.630827	0.645743	0.653119	0.694472	0.671404	0.708292	0.738931	0.733193	9	98506788
cg02860599	0.000922637	-1.15224	0.538097	0.547101	0.533506	0.521767	0.492966	0.580966	0.59698	0.637371	8	1971042
cg02863842	0.0059435	-1.16584	0.104177	0.0939214	0.0991479	0.0971158	0.0920074	0.114495	0.106921	0.118118	19	45349685
cg02870820	0.00569961	-1.13868	0.48866	0.541112	0.466686	0.452835	0.474082	0.548893	0.521552	0.577701	19	56003211
cg02879077	0.00693382	-1.35424	0.0408774	0.046181	0.0482081	0.0502024	0.0595187	0.0640172	0.0682628	0.0672936	11	60543142
cg02879784	0.00619041	-1.22232	0.064502	0.0690038	0.0726234	0.0750727	0.0725883	0.0842757	0.097272	0.0790491	3	128880367
cg02880315	0.000740378	-1.17232	0.219383	0.213869	0.215041	0.217677	0.215935	0.240543	0.259702	0.260184	3	49724254
cg02881230	0.00788721	-1.12621	0.533418	0.553014	0.57057	0.534951	0.529452	0.590891	0.5991	0.646149	1	45988355
cg02883958	0.00156791	-1.17715	0.42303	0.378738	0.38588	0.391959	0.392936	0.461223	0.448764	0.480845	19	18508710
cg02892357	0.000357101	-1.1227	0.723242	0.731186	0.748	0.766989	0.775081	0.874866	0.839506	0.814286	21	45789379
cg02896076	0.00224026	-1.1368	0.375712	0.372735	0.371831	0.370834	0.369982	0.399896	0.418194	0.44873	7	30960947
cg02897882	0.007858	-1.54906	0.0308667	0.0384267	0.0418636	0.0307513	0.0458771	0.0541576	0.0576784	0.0627228	14	23299005
cg02904344	0.00094251	-1.15735	0.547053	0.516641	0.52113	0.546733	0.514291	0.624348	0.600718	0.611841	6	134498979
cg02909399	0.00351333	-1.10616	0.827656	0.788847	0.793869	0.790874	0.765419	0.837291	0.882594	0.907251	10	18523027
cg02909809	0.00836076	-1.14394	0.621865	0.629369	0.646553	0.647087	0.584645	0.730178	0.680148	0.735986	16	6072012
cg02910873	0.00708384	-1.30656	0.254936	0.305028	0.298648	0.267898	0.297406	0.360126	0.345559	0.408964	1	19615652
cg02910979	0.00711924	-1.18238	0.452694	0.434106	0.428094	0.445892	0.420995	0.479562	0.55077	0.516326	15	78339457
cg02920851	0.0069661	-1.11681	0.464251	0.494157	0.469829	0.494664	0.46175	0.541745	0.513075	0.541855	1	55530099
cg02924459	0.00552884	-1.23458	0.118103	0.145251	0.130341	0.138245	0.134046	0.165155	0.161728	0.166512	4	818664
cg02925820	0.00631186	-1.10339	0.718857	0.711908	0.726638	0.727112	0.672912	0.771445	0.801693	0.7816	12	84212931
cg02926622	0.00375985	-1.47909	0.0439797	0.0607915	0.0758327	0.0804135	0.0794669	0.102203	0.102694	0.0982972	6	144386041
cg02927098	0.00783197	-1.24405	0.0691132	0.0722854	0.0801792	0.0659448	0.0715226	0.0941408	0.0845404	0.0894656	15	64455659
cg02927995	0.00887089	-1.16268	0.375172	0.39023	0.334107	0.376537	0.368231	0.427942	0.394044	0.459725	1	54163609
cg02929780	0.00857928	-1.1199	0.626963	0.580288	0.618335	0.626434	0.575484	0.690595	0.670271	0.674136	11	59282555
cg02930888	0.00827836	-1.17724	0.191842	0.189648	0.192372	0.162113	0.1771	0.201227	0.213694	0.227684	10	112402954
cg02931146	0.00321852	-1.11997	0.560361	0.573853	0.593003	0.568463	0.567884	0.621247	0.635087	0.666667	8	128673549
cg02932663	0.00593158	-1.12042	0.607473	0.641438	0.617935	0.625283	0.632524	0.666193	0.693284	0.737767	7	150874931
cg02946294	0.00627251	-1.16045	0.465044	0.481057	0.449259	0.442209	0.463869	0.503366	0.498717	0.593262	11	17034844
cg02947519	0.00861472	-1.18671	0.521088	0.549484	0.467938	0.480178	0.451172	0.520669	0.607458	0.621161	1	85619427
cg02948218	0.00656369	-1.12744	0.618364	0.655422	0.649603	0.625205	0.679945	0.709329	0.727492	0.747047	2	85501701
cg02951185	0.0087862	-1.29794	0.0762751	0.0763122	0.0864175	0.0939078	0.0894592	0.099352	0.117046	0.113297	1	93645390
cg02951357	0.00389247	-1.11629	0.577864	0.574069	0.525416	0.531738	0.547437	0.628743	0.580613	0.630979	1	59280619
cg02953306	0.00491267	-1.21117	0.54632	?	0.555564	0.538054	0.599918	0.657273	0.68356	0.694491	8	27336626
cg02955219	0.00393935	-1.38744	0.0345283	0.0441252	0.046084	0.0384742	0.0463666	0.0570887	0.0602554	0.0573936	14	53418264
cg02955361	0.0010756	-1.29517	0.0568238	0.0577969	0.0586081	0.065708	0.0615181	0.0788209	0.0745746	0.0802773	1	32479956
cg02955744	0.00109872	-1.11894	0.549774	0.561281	0.56182	0.525553	0.534075	0.611842	0.598461	0.621642	2	207667696
cg02957990	0.00130048	-1.37242	0.0503363	0.0586913	0.0492895	0.0489464	0.0440238	0.0622129	0.0695458	0.07449	2	86333310
cg02958634	0.00329462	-1.36376	0.0812765	0.0802707	0.0868744	0.0975122	0.0946302	0.12763	0.109911	0.123513	2	119594696
cg02960347	0.00941731	-1.1307	0.639957	0.616438	0.664083	0.681348	0.660913	0.701295	0.76101	0.754074	3	61715662
cg02964208	0.00853123	-1.15264	0.536816	0.527508	0.56569	0.501091	0.507971	0.618866	0.579785	0.624392	2	101618150
cg02970861	0.00438067	-1.26055	0.0552314	0.0673146	0.0658428	0.0670667	0.0663734	0.0787377	0.081603	0.0833333	11	62359288
cg02975386	0.00563791	-1.37744	0.177391	0.243104	0.202294	0.200316	0.188098	0.265778	0.287771	0.281289	2	127002711
cg02977042	0.000975579	-1.14768	0.558746	0.557518	0.590968	0.551256	0.571562	0.633431	0.662043	0.654265	17	78501207
cg02978505	0.000646017	-1.42966	0.396682	0.455065	0.425893	0.400446	0.433499	0.558532	0.636677	0.615373	16	85292322
cg02985963	0.00401259	-1.62069	0.0435685	0.0427429	0.0377632	0.0378394	0.0501445	0.0580645	0.0673895	0.0806557	2	198380445
cg02987387	0.00578462	-1.10847	0.579303	0.612037	0.570832	0.596544	0.596149	0.6273	0.65117	0.683282	19	38974074
cg02989831	0.00651428	-1.1398	0.28129	0.272919	0.304388	0.274096	0.286553	0.337822	0.316548	0.317886	11	129698366
cg02991051	0.00989927	-1.57605	0.0426	0.0440061	0.0464108	0.0501054	0.04532	0.0747341	0.0565882	0.084585	15	55509989
cg02994187	0.00979853	-1.28618	0.299794	0.334956	0.289976	0.301154	0.264461	0.326286	0.367985	0.449309	6	30431860
cg02997497	0.0025027	-1.12533	0.711895	0.731624	0.713936	0.772092	0.737577	0.811214	0.840441	0.826381	3	68053949
cg02998698	0.00575071	-1.16027	0.341764	0.365163	0.356145	0.335828	0.371278	0.40792	0.392932	0.429971	18	23671366
cg03000419	0.00364634	-1.17479	0.482604	0.475902	0.46288	0.417066	0.444407	0.539733	0.492863	0.570107	11	82997694
cg03001484	0.00421813	-1.13293	0.339058	0.319504	0.313468	0.301983	0.331823	0.358498	0.364687	0.366709	6	70507230
cg03004985	0.00339661	-1.15405	0.380731	0.377917	0.392273	0.368799	0.358889	0.410273	0.437933	0.450553	3	46735695
cg03005767	0.00902332	-1.20107	0.460778	0.492888	0.49922	0.50678	0.519658	0.597149	0.552909	0.636437	5	11494492
cg03007010	0.00573688	-1.36162	0.0639003	0.0685116	0.0757034	0.0702156	0.0601109	0.088562	0.102639	0.0857631	19	36266840
cg03012879	0.00776759	-1.1709	0.0707901	0.0648817	0.0685084	0.0752195	0.0668968	0.0791807	0.0844668	0.0799655	5	74632362
cg03018007	0.00697729	-1.54318	0.037672	0.0410444	0.0390861	0.0381421	0.0470405	0.0610634	0.0529197	0.0737894	10	70997642
cg03020208	0.00305128	-1.12854	0.416438	0.44288	0.396528	0.400936	0.400352	0.456884	?	0.477985	12	50354962
cg03020572	0.00576279	-1.25114	0.0613776	0.068684	0.0843673	0.0777678	0.0758004	0.103642	0.0912307	0.0831567	14	98087004
cg03020885	0.00186241	-1.35538	0.0489599	0.0544641	0.0506133	0.0471486	0.0463037	0.0658058	0.0593383	0.0754693	11	116643423
cg03025061	0.00298696	-1.3955	0.12904	0.10478	0.131207	0.123782	0.127709	0.158001	0.18515	0.173561	8	109261275
cg03028337	0.00315732	-1.11739	0.501563	0.494692	0.523078	0.495892	0.520797	0.55447	0.563171	0.582793	2	56410087
cg03029755	0.00437673	-1.22573	0.502678	0.447966	0.456504	0.460268	0.397279	0.543492	0.548018	0.569727	17	76265444
cg03031983	0.000129828	-1.19449	0.63319	0.610426	0.636782	0.635064	0.621894	0.728211	0.766399	0.754405	14	27545707
cg03032180	0.00971738	-1.10269	0.729646	0.703683	0.682971	0.729248	0.678875	0.791874	0.745463	0.79099	3	194979346
cg03035271	0.00362779	-1.25711	0.395057	0.392693	0.375197	0.4	0.346064	0.469092	?	0.496439	4	2368055
cg03038448	0.00614496	-1.2579	0.314167	0.340312	0.323938	0.335484	0.281666	0.396523	0.424628	0.383216	7	66084410
cg03040522	0.00625508	-1.66114	0.119443	0.100634	0.152324	0.111295	0.151539	0.228426	0.182999	0.221723	1	154599652
cg03044367	0.00158131	-1.12633	0.667537	0.659002	0.663541	0.676562	0.671995	0.738769	0.728674	0.786516	1	22581534
cg03051141	0.00657653	-1.10358	0.718777	0.669918	0.695933	0.721078	0.686747	0.767171	0.795479	0.752372	16	9659764
cg03052074	0.000228321	-1.1161	0.514681	0.519941	0.513	0.502186	0.51155	0.571787	0.553308	0.587765	13	41543655
cg03053826	0.00622999	-1.28405	0.0529964	0.0578577	0.0570709	0.0518853	0.0612307	0.0668031	0.070748	0.0786626	15	96868935
cg03055499	0.00335383	-1.56845	0.0339789	0.0349807	0.040625	0.0530582	0.0382837	0.0625407	0.0631021	0.0636145	17	64298048
cg03056465	0.00766012	-1.28931	0.0409128	0.0517811	0.0496336	0.0491818	0.0454231	0.0624844	0.0573637	0.0634238	20	3026350
cg03060457	0.00488043	-1.26813	0.052646	0.0439052	0.05254	0.0570535	0.0597574	0.0738486	0.0699103	0.059708	11	126138639
cg03060468	0.00804574	-1.18204	0.538589	0.583154	0.516417	0.476578	0.56568	0.618554	0.619242	0.657358	5	140683196
cg03060490	0.00547476	-1.11739	0.581449	0.623653	0.584325	0.573979	0.612652	0.643391	0.658895	0.68941	12	56050780
cg03062417	0.000856774	-1.15107	0.575145	0.535878	0.559317	0.565264	0.556891	0.628219	0.638282	0.661078	8	67868321
cg03067296	0.00356501	-1.36207	0.652885	0.515459	0.504809	0.571889	0.569531	0.735139	0.795562	0.767337	17	76274577
cg03068497	0.00535587	-1.248	0.428571	0.503302	0.476788	0.529455	0.479696	0.61553	0.581208	0.615335	7	30635838
cg03068609	0.00612124	-1.20103	0.135065	0.137978	0.13693	0.130097	0.138236	0.157748	0.149619	0.179991	5	50679676
cg03071876	0.00707745	-1.10898	0.555161	0.571369	0.550034	0.54446	0.516621	0.573738	0.588421	0.652359	17	45929434
cg03072196	0.00217624	-1.67296	0.325916	0.315301	0.244032	0.303148	0.182273	0.475776	0.4278	0.472381	7	158614019
cg03079104	0.00390867	-1.14235	0.399705	0.418702	0.420599	0.396027	0.414866	0.444973	0.478391	0.480725	11	62689416
cg03080008	0.00646526	-1.13834	0.574424	0.595418	0.56088	0.607039	0.587439	0.658639	0.632806	0.703244	12	65928450
cg03084724	0.00978924	-1.19503	0.162452	0.139219	0.119502	0.130561	0.126678	0.155299	0.158786	0.169427	10	125853232
cg03086300	0.00818714	-1.38674	0.0447143	0.0463898	0.0512286	0.048438	0.0531318	0.0580938	0.0719204	0.0729745	5	40410625
cg03091751	0.00742862	-1.42353	0.061991	0.0458608	0.062101	0.0747347	0.0814885	0.0988078	0.104423	0.0768904	7	150941543
cg03092551	0.00892193	-1.24175	0.306349	0.341488	0.307743	0.361626	0.29337	0.3916	0.404833	0.403063	2	58273420
cg03095358	0.00553819	-1.12813	0.639546	0.689586	0.701713	0.690762	0.672347	0.740833	0.776305	0.781305	4	46534014
cg03096975	0.000305606	-1.35815	0.0564775	0.0625	0.0562771	0.0577709	0.0633893	0.0800825	0.078152	0.0831564	19	46142574
cg03099849	0.00390941	-1.25674	0.295972	0.339299	0.321993	0.334647	0.30695	0.395034	0.377645	0.431246	19	39755959
cg03102786	0.00197368	-1.34319	0.0597465	0.067968	0.0603777	0.0617167	0.0728128	0.0881561	0.0855257	0.086408	4	41216493
cg03105919	0.00871107	-1.21896	0.389457	0.378845	0.352788	0.366126	0.3503	0.444743	0.386576	0.50587	1	234682885
cg03108347	0.00674625	-1.12352	0.350956	0.388639	0.377455	0.383031	0.379498	0.418641	0.415659	0.432902	11	70961784
cg03109505	0.00682879	-1.39534	0.0466798	0.0585191	0.0518433	0.0533569	0.0412969	0.0636034	0.0707492	0.0759166	17	58754626
cg03110722	0.0058662	-1.12152	0.645688	0.625679	0.639787	0.660113	0.674098	0.733876	0.699539	0.750793	19	51984816
cg03115547	0.00296497	-1.26162	0.0709432	0.0619915	0.0657861	0.0761545	0.0742445	0.0919713	0.0900268	0.0830573	19	32836416
cg03117097	0.0003765	-1.10681	0.641649	0.651167	0.634751	0.642981	0.622088	0.685516	0.702596	0.728585	7	99309849
cg03117106	0.000626862	-1.12847	0.687132	0.649945	0.637528	0.656925	0.63876	0.716175	0.727808	0.76527	3	179165750
cg03117585	0.00245725	-1.24635	0.0629723	0.0704841	0.070156	0.0758694	0.0736387	0.0895911	0.0851463	0.0897483	9	74526019
cg03119560	0.00202871	-1.11623	0.655931	0.632045	0.681879	0.669014	0.67916	0.722695	0.757064	0.74558	16	24895134
cg03120522	0.00947231	-1.13027	0.579793	0.557812	0.547865	0.562803	0.510194	0.617522	0.58169	0.664777	18	45424457
cg03120789	0.000307197	-1.29918	0.0868252	0.094109	0.0870458	0.0850244	0.0811742	0.105636	0.114079	0.117982	1	20208808
cg03122992	0.0040951	-1.46011	0.0910601	0.075357	0.083201	0.0816387	0.107636	0.124595	0.131384	0.128805	12	72056182
cg03130816	0.00085351	-1.17811	0.576439	0.555516	0.532668	0.523609	0.545008	0.628078	0.663423	0.637908	1	39456103
cg03132729	0.00277397	-1.14267	0.462512	0.482862	0.488807	0.462026	0.488371	0.543476	0.525409	0.564985	1	21947437
cg03134556	8.9594e-05	-1.10072	0.625206	0.633066	0.62259	0.623223	0.61481	0.67388	0.694131	0.690441	12	129028192
cg03138405	0.00672959	-1.32427	0.0535836	0.0638278	0.0583384	0.0617859	0.0717364	0.0784748	0.0863732	0.0812766	19	17666150
cg03138675	0.00861161	-1.14163	0.704467	0.691275	0.738482	0.745233	0.689947	0.818543	0.776536	0.849647	4	93761401
cg03138957	0.00199634	-1.1252	0.49675	0.463108	0.468324	0.461642	0.483062	0.526297	0.522075	0.551116	19	17488535
cg03139898	0.00821384	-1.42512	0.0560027	0.05093	0.0637119	0.0503027	0.0496224	0.0771682	0.0676415	0.0862392	12	90103519
cg03144848	0.00585493	-1.20323	0.167736	0.156012	0.14556	0.165914	0.162886	0.183356	0.184375	0.20697	8	142377368
cg03145200	0.00734243	-1.11786	0.641913	0.66191	0.630941	0.615679	0.614649	0.663918	0.732778	0.721486	16	27438618
cg03145599	0.00212627	-1.10474	0.763866	0.771341	0.724316	0.733654	0.697048	0.821497	0.780574	0.836499	16	33952333
cg03147838	0.00137498	-1.18228	0.237977	0.215951	0.218403	0.21956	0.212456	0.257689	0.248524	0.275085	1	32226935
cg03147990	0.00462185	-1.2924	0.0611558	0.056187	0.0494798	0.0605374	0.0559818	0.0771921	0.0700257	0.0723081	19	37701738
cg03151165	0.00330691	-1.11415	0.438721	0.426489	0.428307	0.422472	0.447453	0.465319	0.480308	0.499078	8	41107543
cg03152179	0.00962982	-1.22369	0.299689	0.322704	0.275548	0.33476	0.336221	0.389109	0.39232	0.371759	4	75024649
cg03153178	0.00825203	-1.45325	0.0417495	0.0424378	0.0628352	0.0588235	0.0584603	0.0737379	0.0753207	0.0819722	10	70480812
cg03157588	0.000981947	-1.10774	0.739097	0.742122	0.701081	0.697116	0.68916	0.791494	0.79047	0.785367	6	32006079
cg03158581	0.0051657	-1.17894	0.127828	0.13961	0.128413	0.113166	0.1254	0.148756	0.142916	0.155517	5	153858816
cg03164498	0.00510305	-1.32452	0.411067	0.417535	0.34779	0.322802	0.280105	0.486665	0.425913	0.493654	20	48316053
cg03164761	0.00289077	-1.43597	0.0498965	0.038599	0.052441	0.0476007	0.0487057	0.0647158	0.0676881	0.0720928	17	16440208
cg03165904	0.00134983	-1.20829	0.0983064	0.101603	0.104368	0.0975379	0.101972	0.129516	0.119042	0.117144	12	58027520
cg03166302	0.0062392	-1.11653	0.158172	0.154958	0.147375	0.153115	0.139831	0.170601	0.162757	0.170151	6	134212700
cg03169767	0.00131774	-1.20233	0.0756781	0.0808143	0.0809916	0.0768068	0.0806645	0.0948035	0.0907436	0.0991652	3	190580595
cg03170186	0.00498979	-1.18169	0.333073	0.339693	0.32157	0.335551	0.30287	0.355594	0.374852	0.422683	X	123039334
cg03172991	0.00988544	-1.10595	0.5287	0.488482	0.50005	0.493516	0.491125	0.549985	0.523829	0.582153	19	13105728
cg03174017	0.00911688	-1.13467	0.425213	0.47706	0.446094	0.432968	0.422281	0.479084	0.503859	0.514205	19	12164305
cg03174332	0.00467284	-1.1003	0.717316	0.757499	0.724278	0.730897	0.687143	0.782006	0.777449	0.823318	10	30642989
cg03175677	0.00347509	-1.25773	0.350691	0.352106	0.35091	0.337846	0.345148	0.388464	0.451587	0.467904	10	106495209
cg03175730	0.00560988	-1.10361	0.615163	0.607	0.631875	0.664348	0.652164	0.68575	0.709673	0.707572	19	36079655
cg03176993	0.00300929	-1.1012	0.745552	0.736108	0.68	0.690794	0.692007	0.794189	0.757633	0.783787	3	188664887
cg03177600	0.0020603	-1.22804	0.096067	0.10507	0.0985556	0.103369	0.0921123	0.122945	0.115438	0.125941	3	164911744
cg03178071	0.0094925	-1.38454	0.050734	0.0678412	0.0704731	0.068323	0.0601156	0.0806936	0.0922398	0.0910534	19	44507379
cg03181501	0.00950549	-1.1289	0.556325	0.595715	0.590354	0.63202	0.600188	0.652314	0.677374	0.68712	6	7468364
cg03181829	0.00681211	-1.28625	0.0776325	0.0756163	0.0713207	0.0776904	0.0764873	0.0861708	0.106049	0.0998197	6	121757927
cg03182029	0.0069554	-1.81804	0.0389908	0.0553151	0.0599495	0.0499087	0.0304783	0.0754535	0.0905707	0.0900541	2	165697222
cg03186999	0.00269893	-1.15804	0.20061	0.191221	0.175516	0.190505	0.187481	0.210895	0.207303	0.236054	17	7165420
cg03187777	0.0018667	-1.11442	0.432771	0.433675	0.405114	0.414642	0.388707	0.46448	0.449385	0.469541	3	123699389
cg03190267	0.00859432	-1.11243	0.17521	0.17166	0.179101	0.164071	0.17372	0.188434	0.185629	0.201481	16	2523468
cg03194064	0.00879061	-1.35314	0.0433176	0.0425037	0.0554656	0.0475034	0.0550368	0.0631119	0.0646688	0.0705451	16	57509786
cg03196097	0.00866453	-1.18331	0.171766	0.186587	0.170512	0.192538	0.188729	0.211437	0.229586	0.206335	4	4857441
cg03197798	0.00135134	-1.10622	0.69589	0.69836	0.684757	0.684439	0.687265	0.727933	0.767153	0.791381	11	26972291
cg03198117	0.00980581	-1.14148	0.61533	0.673178	0.61809	0.612953	0.631486	0.725203	0.664082	0.762626	X	152939967
cg03203667	0.0042739	-1.13964	0.730103	0.798993	0.745489	0.768602	0.751029	0.858583	0.895987	0.840948	13	67946668
cg03204168	0.00842229	-1.58256	0.0555683	0.0546192	0.0589109	0.0656007	0.0590177	0.110315	0.0765923	0.0920979	12	63179901
cg03206445	0.00604823	-1.25887	0.312963	0.315975	0.401897	0.37531	0.410031	0.444968	0.474683	0.458598	9	140062197
cg03207151	0.0038054	-1.18954	0.472834	0.413552	0.429382	0.420125	0.401691	0.508736	0.486857	0.526191	12	54442288
cg03209127	0.000723288	-1.32204	0.0508258	0.0526558	0.0619556	0.0621615	0.0598168	0.0749606	0.076488	0.0771203	1	235668099
cg03210400	0.00428341	-1.11544	0.602045	0.642159	0.661752	0.637949	0.648293	0.737646	0.696346	0.705985	15	96582394
cg03211193	0.00765718	-1.27568	0.127466	0.13469	0.141881	0.133228	0.119934	0.179539	0.152115	0.171192	9	71298647
cg03214064	0.00727928	-1.10876	0.71048	0.73751	0.744307	0.73479	0.72762	0.807528	0.773687	0.847911	12	103747013
cg03215805	0.00310317	-1.10151	0.672998	0.713615	0.683519	0.673783	0.688408	0.736558	0.738981	0.78859	2	241201955
cg03218146	0.00146145	-1.30468	0.0798722	0.0785741	0.076973	0.0824051	0.0823966	0.112892	0.0975529	0.103033	4	71569885
cg03218460	0.00964887	-1.10863	0.657393	0.643496	0.649215	0.666822	0.672624	0.705471	0.709087	0.771105	4	7268631
cg03219235	0.00544535	-1.12994	0.662504	0.674597	0.688791	0.726483	0.714083	0.758416	0.790783	0.803546	14	88336254
cg03222009	0.00658927	-1.1099	0.613363	0.601735	0.598009	0.573688	0.624247	0.643057	0.661656	0.696855	2	129077232
cg03222066	0.00529662	-1.15265	0.461782	0.443647	0.455372	0.431865	0.45314	0.518977	0.481577	0.54933	11	119019384
cg03224576	0.00411347	-1.17864	0.291036	0.313053	0.265034	0.266115	0.257177	0.335723	0.310039	0.334622	21	47222759
cg03226439	0.00606403	-1.17221	0.315158	0.279671	0.282011	0.312397	0.300227	0.344844	0.344113	0.35798	17	7997303
cg03228099	0.00382234	-1.10459	0.64417	0.622706	0.678982	0.649202	0.653276	0.707386	0.717225	0.730089	18	71909885
cg03232484	0.00960131	-1.40708	0.0478202	0.0475523	0.055706	0.0702885	0.0515732	0.0799409	0.0739156	0.0771421	7	93633800
cg03236939	0.00838866	-1.16376	0.0855401	0.077349	0.0766427	0.0817439	0.081806	0.0974651	0.0884561	0.095275	17	72428367
cg03238484	0.00315599	-1.23073	0.101925	0.0951908	0.103765	0.104192	0.102566	0.135471	0.117836	0.122179	15	86397811
cg03238981	0.000979653	-1.21208	0.188053	0.169096	0.189267	0.176362	0.188697	0.224611	0.224294	0.21497	2	232469148
cg03241816	0.00304152	-1.15868	0.554986	0.523408	0.536656	0.582151	0.574037	0.647748	0.628649	0.651903	6	6731222
cg03244411	0.00663366	-1.25835	0.108507	0.09529	0.0893741	0.108536	0.102886	0.125657	0.121219	0.133529	6	99295790
cg03245733	0.00599915	-1.37775	0.0621787	0.0540084	0.0529541	0.0575652	0.0615704	0.0862449	0.0696631	0.082224	8	124407825
cg03245734	0.0032474	-1.34418	0.0830946	0.0650309	0.065986	0.0638821	0.0653423	0.0849798	0.0879223	0.102874	8	108510096
cg03247892	0.00150782	-1.27011	0.0653955	0.0663499	0.0579786	0.0573201	0.0599307	0.0780211	0.0682337	0.0865399	19	10398215
cg03248196	0.00357145	-1.25332	0.049293	0.050501	0.0512454	0.0508449	0.0563852	0.0620894	0.062864	0.0691991	12	48214108
cg03249509	0.00227766	-1.15361	0.588819	0.634831	0.589477	0.558525	0.6066	0.666427	0.683937	0.706684	2	208898940
cg03252902	0.00780019	-1.44826	0.0897732	0.0889798	0.0576172	0.0793316	0.0599735	0.116019	0.0941198	0.115071	3	98275054
cg03253268	0.00329523	-1.15593	0.534908	0.556675	0.506037	0.493699	0.533997	0.59124	0.56459	0.657237	21	44592883
cg03254146	0.00100928	-1.12422	0.638717	0.645696	0.703722	0.665253	0.679794	0.757525	0.748175	0.747232	1	30240119
cg03254601	0.00105626	-1.10961	0.526883	0.514331	0.497017	0.501067	0.510744	0.553939	0.542612	0.596406	9	94124496
cg03256960	0.00261659	-1.13108	0.597009	0.583153	0.598642	0.567659	0.556407	0.658809	0.626806	0.680608	17	6331743
cg03257475	0.00674093	-1.44313	0.109735	0.0794532	0.108171	0.0929559	0.108108	0.131864	0.153976	0.146023	12	31477445
cg03260624	0.00101302	-1.12087	0.630856	0.607396	0.613605	0.606367	0.578702	0.679137	0.663903	0.695868	1	91970722
cg03260765	0.00279552	-1.17601	0.19251	0.210589	0.199223	0.205875	0.218469	0.238653	0.241664	0.244474	16	2247229
cg03262020	0.00837208	-1.17396	0.312629	0.331005	0.285	0.314168	0.270466	0.335337	0.358628	0.367811	9	35164848
cg03264133	0.00672185	-1.36267	0.378538	0.410056	0.397409	0.404417	0.374498	0.597536	0.565048	0.448147	6	25882463
cg03265277	0.00914952	-1.44378	0.0627225	0.0768153	0.081577	0.0564596	0.0667647	0.0908793	0.0974026	0.109575	20	54820970
cg03275067	0.00440975	-1.47896	0.0462963	0.0545047	0.0691582	0.0700227	0.0651195	0.084507	0.0922794	0.0944711	3	99536401
cg03276430	0.00268069	-1.16093	0.444118	0.421053	0.391291	0.37913	0.366071	0.467884	0.438632	0.481013	17	64563454
cg03278407	0.0021117	-1.11898	0.646898	0.677189	0.663735	0.617469	0.640581	0.70921	0.715927	0.749659	11	3537419
cg03283235	0.0015375	-1.10365	0.701682	0.689539	0.709669	0.699289	0.686743	0.751483	0.757839	0.79743	12	130354828
cg03287658	0.00214711	-1.13841	0.303136	0.312105	0.316447	0.302046	0.307065	0.350894	0.334983	0.365383	6	41410918
cg03292688	0.00826437	-1.11217	0.704716	0.673213	0.66817	0.680367	0.625776	0.739151	0.707747	0.783204	4	124017413
cg03296297	0.00317877	-1.1393	0.624789	0.634199	0.625309	0.600981	0.612521	0.65823	0.710885	0.743465	6	105879009
cg03296797	0.000467877	-1.25573	0.369798	0.39083	0.365909	0.352713	0.362237	0.453925	0.428764	0.500562	16	84870066
cg03299331	0.00848072	-1.16933	0.0850667	0.081634	0.0797206	0.0798322	0.0817197	0.0857126	0.095873	0.103681	20	2187844
cg03302807	0.00644867	-1.11584	0.625884	0.604748	0.57314	0.59556	0.574946	0.683404	0.626537	0.676464	7	90254095
cg03306221	0.006476	-1.15568	0.165257	0.179622	0.161861	0.168549	0.17356	0.191945	0.205421	0.191202	22	44258602
cg03311789	0.00189139	-1.12259	0.648241	0.700721	0.665232	0.679235	0.672323	0.748378	0.770239	0.748788	2	241635984
cg03312158	0.000850782	-1.31178	0.156188	0.174127	0.165201	0.186103	0.177122	0.218943	0.230349	0.227249	5	125992272
cg03312572	0.00795914	-1.11689	0.120186	0.10965	0.110528	0.105882	0.10372	0.12085	0.117513	0.128755	7	17979929
cg03312643	0.00964487	-1.58101	0.0695565	0.0571669	0.0658878	0.0601266	0.0645269	0.107284	0.0773832	0.116077	3	181659350
cg03316763	0.000409217	-1.1116	0.682286	0.689166	0.649961	0.66213	0.671739	0.720214	0.751795	0.761679	16	17464914
cg03318924	0.00675427	-1.11965	0.521529	0.555455	0.545488	0.516254	0.518439	0.6079	0.568006	0.606807	12	49728150
cg03322129	0.00788491	-1.43659	0.0427082	0.0613904	0.0482047	0.0436211	0.0507137	0.074657	0.0667104	0.0710134	1	1209673
cg03322239	0.00190605	-1.4506	0.0397704	0.0433387	0.0437757	0.0418838	0.0490559	0.0580858	0.0628689	0.0685833	6	42531869
cg03322548	0.00654605	-1.26874	0.0463594	0.0531414	0.0616785	0.0629135	0.0718835	0.0774529	0.0790309	0.0703698	4	331119
cg03328299	8.21457e-05	-1.11669	0.692567	0.675757	0.668072	0.656353	0.665735	0.729455	0.747844	0.768947	15	74281983
cg03328650	0.00381406	-1.22493	0.0783057	0.0861039	0.0711005	0.0821515	0.0787402	0.0952675	0.0912539	0.103898	5	71616077
cg03328804	0.00973343	-1.25779	0.119406	0.123166	0.103674	0.114516	0.132647	0.138766	0.149405	0.158679	11	75526289
cg03329019	0.00650333	-1.10333	0.674817	0.673568	0.671603	0.689569	0.687214	0.712705	0.770024	0.765402	1	221051117
cg03337735	0.00539297	-1.10568	0.791497	0.73276	0.76846	0.760686	0.789295	0.835318	0.846601	0.866942	22	49605859
cg03338959	0.00793124	-1.41079	0.0626659	0.0632596	0.0663677	0.0626773	0.0831339	0.101332	0.0873219	0.0978295	7	105926305
cg03339123	0.00943795	-1.20763	0.0634561	0.0701097	0.0731366	0.083234	0.07683	0.0940119	0.0863584	0.0865305	2	176866845
cg03345037	0.00138171	-1.18737	0.201642	0.220426	0.231753	0.227242	0.214618	0.26222	0.261194	0.258579	11	94134446
cg03346079	0.00619475	-1.27719	0.0642923	0.0745976	0.0620993	0.0653581	0.0697522	0.0817926	0.0921304	0.0835001	3	13920346
cg03346351	0.000233937	-1.15195	0.602856	0.585219	0.630912	0.6143	0.597354	0.696056	0.70229	0.698389	22	38496902
cg03350814	0.00388704	-1.27436	0.042155	0.0508805	0.0493663	0.0514736	0.0460909	0.0623428	0.0645788	0.0570167	8	104512423
cg03356493	0.00443138	-1.25955	0.0982337	0.121742	0.11464	0.107877	0.107484	0.140645	0.138548	0.136572	19	53898642
cg03358415	0.000745703	-1.32147	0.338205	0.299892	0.364613	0.365136	0.324278	0.467314	0.464975	0.413463	2	128569383
cg03369308	0.00958042	-1.23391	0.0584059	0.0661249	0.0772396	0.0807146	0.0708833	0.0936548	0.0851618	0.0842089	20	30555405
cg03369942	0.000377159	-1.18985	0.0693903	0.0658509	0.0685413	0.0720474	0.0711309	0.082554	0.0815886	0.083742	22	42342822
cg03370391	0.00201835	-1.14209	0.425728	0.396124	0.432322	0.428353	0.421328	0.481334	0.470771	0.490424	5	140517239
cg03371545	0.00156507	-1.56991	0.114199	0.134297	0.10275	0.097367	0.0933036	0.183264	0.160393	0.166362	8	94858997
cg03375679	0.00281618	-1.54976	0.076423	0.0610037	0.0607402	0.0630534	0.0766191	0.108701	0.0925753	0.112673	11	124610713
cg03375833	0.00307439	-1.10734	0.617967	0.584619	0.597581	0.600785	0.584055	0.667832	0.636245	0.676909	3	9859360
cg03375993	0.00872806	-1.11951	0.607969	0.647987	0.623596	0.643665	0.632041	0.680879	0.687275	0.748043	1	236856907
cg03381047	0.00592328	-1.56275	0.145078	0.184866	0.178141	0.146336	0.132125	0.216778	0.223483	0.296142	6	168078772
cg03381168	0.00896508	-1.4849	0.0649311	0.0816411	0.0619867	0.085117	0.0864389	0.105488	0.10792	0.125052	12	57623211
cg03382306	0.00369217	-1.21487	0.581616	0.501148	0.543879	0.498704	0.525311	0.624304	0.628655	0.675178	15	66097959
cg03383158	0.00783304	-1.16775	0.0946454	0.0919101	0.093878	?	0.0915649	0.111452	0.101357	0.111754	2	27938292
cg03386508	0.00934765	-1.26797	0.0979554	0.103405	0.0985251	0.0926919	0.113384	0.13648	0.118518	0.129891	7	142552587
cg03389215	8.94257e-05	-1.11014	0.63534	0.654185	0.614727	0.604155	0.598387	0.670445	0.67675	0.715509	1	24476532
cg03390090	0.00136189	-1.12903	0.608505	0.579251	0.553961	0.521112	0.539501	0.61275	0.623874	0.653894	2	49295262
cg03393602	0.00744144	-1.25649	0.377303	0.391455	0.381211	0.41438	0.38358	0.435436	0.508465	0.523075	18	19285336
cg03397035	0.00614585	-1.10945	0.41974	0.438768	0.416182	0.443313	0.43746	0.464497	0.473353	0.495714	6	3511352
cg03398865	0.00910916	-1.14667	0.257363	0.268577	0.287531	0.288203	0.300339	0.308685	0.33581	0.322969	5	1879554
cg03409300	0.00699075	-1.16794	0.423413	0.47203	0.486639	0.501436	0.481029	0.53619	0.562731	0.561459	8	143096581
cg03411341	0.00907376	-1.19494	0.218427	0.205541	0.19754	0.206214	0.187515	0.223714	0.223511	0.276628	9	43684598
cg03414300	0.0091233	-1.26712	0.304909	0.3317	0.375405	0.367473	0.30779	0.420572	0.419689	0.443967	1	53480355
cg03414631	0.0090175	-1.37335	0.0387148	0.0383501	0.0476711	0.0428763	0.0458527	0.0514645	0.0654533	0.059344	1	26146153
cg03416085	0.00324937	-1.22155	0.172755	0.196766	0.162776	0.16605	0.167937	0.216145	0.196869	0.219639	5	6583103
cg03423968	0.00334129	-1.30864	0.0403785	0.0397439	0.0370749	0.0456564	0.0388193	0.053236	0.0500148	0.0550018	10	124914448
cg03424550	0.00660552	-1.14999	0.606223	0.667323	0.616627	0.663701	0.671024	0.750403	0.769034	0.709855	12	22032380
cg03433655	0.00967149	-1.29179	0.0668133	0.0669371	0.0685144	0.0719924	0.0621926	0.0888715	0.0757358	0.0956796	4	108745771
cg03436558	0.0024693	-1.19206	0.0745145	0.0795073	0.0711046	0.0677989	0.0765735	0.0855162	0.0838077	0.0940062	16	75657345
cg03437472	0.00595813	-1.3333	0.290798	0.34728	0.369055	0.382012	0.370587	0.433762	0.488958	0.487621	10	87287326
cg03437675	0.00263503	-1.13036	0.636402	0.632216	0.623231	0.630047	0.581862	0.69583	0.670574	0.733392	12	110271625
cg03438100	0.000239898	-1.11138	0.705818	0.721335	0.732184	0.71625	0.720586	0.786195	0.799936	0.811789	17	39286
cg03441835	0.00610763	-1.4455	0.034423	0.0410058	0.0503847	0.0400973	0.0505086	0.0586317	0.0689304	0.060609	2	28974146
cg03442467	0.00781686	-1.36908	0.0763848	0.0687883	0.0711372	0.0755611	0.0641861	0.0948163	0.0835446	0.113225	1	66797701
cg03442837	0.00834128	-1.10831	0.461677	0.511836	0.473343	0.464826	0.46937	0.526621	0.512186	0.541359	14	94862486
cg03443331	0.00578876	-1.14555	0.549467	0.565616	0.585999	0.534164	0.51524	0.622566	0.627874	0.638085	2	97302668
cg03450275	0.00885695	-1.19123	0.285738	0.28808	0.277436	0.279203	0.236509	0.325089	0.32814	0.321969	6	28745104
cg03450621	1.92278e-05	-1.67256	0.0745639	0.0823414	0.0808696	0.0793565	0.076544	0.124805	0.135182	0.135083	2	20215503
cg03450635	0.000295281	-1.2264	0.341144	0.318787	0.365553	0.357195	0.365613	0.448617	0.423077	0.418382	4	159094213
cg03453764	0.00360424	-1.47562	0.0581818	0.0745647	0.0678689	0.0601622	0.0623698	0.0839827	0.102125	0.099753	16	2918704
cg03455276	0.00766365	-1.14448	0.302284	0.295405	0.296144	0.315221	0.287332	0.333771	0.327776	0.364201	19	6464009
cg03457587	0.00434817	-1.19596	0.0861467	0.09907	0.0961538	0.0979038	0.101469	0.120838	0.119963	0.10546	19	54694791
cg03466932	0.00228228	-1.29946	0.0549734	0.0597572	0.0568116	0.0510727	0.0588153	0.0766021	0.0679197	0.0746795	6	26027575
cg03467088	0.0036435	-1.23888	0.371535	0.410734	0.364724	0.369141	0.416699	0.469256	0.457868	0.506983	10	46090686
cg03469471	0.00340822	-1.1693	0.325426	0.343407	0.322887	0.300556	0.33559	0.376335	0.388274	0.376375	7	150707830
cg03471195	0.00732366	-1.16542	0.690301	0.632976	0.625865	0.55801	0.586534	0.688746	0.664071	0.79706	12	727301
cg03473243	0.00385208	-1.10589	0.712626	0.771025	0.801114	0.793824	0.79021	0.856232	0.872128	0.8456	19	51188059
cg03474742	0.00764197	-1.1029	0.604185	0.604795	0.567937	0.626325	0.588665	0.648543	0.649661	0.67877	4	142624081
cg03475229	0.00898409	-1.11052	0.551913	0.566819	0.59685	0.599034	0.549003	0.630841	0.635616	0.643382	19	57438933
cg03480299	0.00704051	-1.10392	0.710606	0.741666	0.683936	0.720057	0.661116	0.746141	0.771973	0.804771	14	85881308
cg03483464	0.000859126	-1.32184	0.262878	0.268569	0.24977	0.24294	0.218242	0.32709	0.295545	0.359039	3	98312971
cg03483632	0.00607253	-1.21629	0.288874	0.243116	0.233027	0.253071	0.247923	0.299742	0.308568	0.313303	11	35639276
cg03483709	0.00455836	-1.241	0.140297	0.147521	0.148253	0.122082	0.137066	0.162223	0.173886	0.180327	10	81964318
cg03483944	0.00142419	-1.11056	0.676678	0.668219	0.644038	0.682392	0.684886	0.732767	0.744876	0.757392	19	55874700
cg03485669	0.00470602	-1.10832	0.58996	0.590095	0.572101	0.591296	0.616212	0.649853	0.638341	0.678263	8	13016635
cg03487133	0.00529794	-1.11972	0.700368	0.637348	0.63637	0.642743	0.625161	0.727365	0.719159	0.727684	15	31528827
cg03489565	0.00290959	-1.11977	0.604131	0.636617	0.639296	0.624925	0.607896	0.68666	0.681137	0.721777	13	108507266
cg03490331	0.0077096	-1.1947	0.197846	0.221487	0.196024	0.209296	0.182323	0.239281	0.224705	0.255396	5	172672817
cg03492965	0.00867387	-1.22384	0.0364217	0.043577	0.0515362	0.0506329	0.0451128	0.0580031	0.0605307	0.0495947	2	88301518
cg03497399	0.00639082	-1.17964	0.359794	0.34314	0.342414	0.340621	0.301917	0.386867	0.370308	0.432493	3	33260934
cg03498458	0.00935054	-1.28612	0.250734	0.237399	0.263039	0.248771	0.242059	0.290839	0.300665	0.364635	6	94496306
cg03500973	0.00701231	-1.31173	0.0672931	0.065326	0.0741294	0.0704114	0.0740324	0.0823788	0.0933381	0.100646	12	68024780
cg03510378	0.00034046	-1.73351	0.0692888	0.0747302	0.0707457	0.0916899	0.0815029	0.143834	0.143761	0.1156	5	140797092
cg03510486	0.00104854	-1.22891	0.191238	0.188424	0.212276	0.20417	0.199619	0.23469	0.25717	0.243752	12	53264540
cg03510605	0.00304629	-1.1585	0.404378	0.382663	0.373262	0.395752	0.390689	0.428124	0.441244	0.48063	12	115104734
cg03511806	0.00898544	-1.36541	0.0525547	0.0661825	0.0656684	0.0753228	0.0646843	0.0828571	0.0895709	0.0936396	5	66124801
cg03512499	0.00868541	-1.20713	0.146434	0.168356	0.145189	0.158762	0.168334	0.183173	0.191814	0.194719	6	134216920
cg03513962	0.00268959	-1.15065	0.094023	0.100676	0.0924895	0.0967237	0.0969592	0.108401	0.114747	0.108798	11	64511971
cg03519967	0.00367079	-1.11538	0.650589	0.650491	0.677843	0.642593	0.654965	?	0.721981	0.739742	1	26010346
cg03523740	0.00936493	-1.15693	0.386656	0.38961	0.360048	0.361504	0.312084	0.412204	0.389945	0.447391	1	32645027
cg03525628	0.0064521	-1.12485	0.507277	0.544283	0.466545	0.507499	0.491084	0.553724	0.566206	0.573891	11	82234303
cg03527086	0.00838115	-1.245	0.139088	0.156984	0.154932	0.130422	0.159577	0.181133	0.189881	0.182667	11	64074137
cg03528619	0.00625256	-1.1098	0.634603	0.61934	0.605094	0.645276	0.614657	0.700948	0.660192	0.713205	17	6980134
cg03528730	0.008742	-1.11836	0.717221	0.676311	0.638464	0.704115	0.671705	0.754821	0.732026	0.794196	4	25793993
cg03535610	0.00679511	-1.17535	0.582063	0.52812	0.522289	0.57752	0.509599	0.61728	0.633255	0.663562	21	39832552
cg03538480	0.00349697	-1.28936	0.473411	0.492402	0.614102	0.56366	0.550471	0.685058	0.692863	0.712089	2	8785262
cg03541057	0.00762166	-2.00861	0.071116	0.10055	0.108347	0.127396	0.0756334	0.193805	0.242053	0.142335	1	150206242
cg03542003	2.27045e-05	-1.11431	0.561667	0.566552	0.550128	0.539758	0.550594	0.606602	0.604676	0.636183	16	81674717
cg03543448	0.00821387	-1.25728	0.365359	0.330153	0.339286	0.290388	0.334554	0.40812	0.371016	0.467419	16	4384967
cg03549515	0.00310574	-1.35961	0.0911024	0.0916718	0.0793081	0.0970614	0.0970329	0.133166	0.116421	0.122603	8	92405918
cg03552035	0.0091938	-1.12388	0.621837	0.661662	0.636334	0.595104	0.591729	0.712322	0.662303	0.715101	18	5421105
cg03552327	0.00453424	-1.37101	0.0519018	0.0522552	0.0541108	0.0580054	0.0630261	0.074219	0.0717829	0.0837704	12	50222455
cg03553824	0.00486006	-1.18245	0.484883	0.509417	0.491963	0.514916	0.46382	0.559264	0.614289	0.575248	7	152074404
cg03556995	0.00145981	-1.1796	0.227672	0.217955	0.250119	0.251591	0.229306	0.279125	0.286879	0.269444	4	84561314
cg03559836	0.00887612	-1.10966	0.0619402	0.0661324	0.0668556	0.0688476	0.07144	0.0787748	0.07687	0.0686274	12	69634561
cg03560586	0.000419674	-1.22936	0.258565	0.25236	0.287397	0.271416	0.273114	0.330826	0.326622	0.334625	2	239334908
cg03560684	0.00755868	-1.25248	0.0617503	0.0679726	0.0895212	0.0865633	0.089688	0.107338	0.0972389	0.094858	5	76070572
cg03560936	0.00867248	-1.12157	0.507312	0.537446	0.562461	0.521622	0.551965	0.596569	0.591594	0.616941	19	36621529
cg03564557	0.00974953	-1.1183	0.552826	0.603121	0.56764	0.591952	0.620747	0.660262	0.658061	0.653819	7	1594949
cg03569616	0.00860919	-1.50698	0.0677891	0.100851	0.079275	0.0633947	0.0632584	0.11515	0.105655	0.117274	11	108092409
cg03569909	0.00484384	-1.21592	0.0831203	0.0824519	0.0975345	0.0908267	0.0933839	0.110409	0.10448	0.112192	1	46908380
cg03569932	0.00133728	-1.12849	0.398279	0.391089	0.372856	0.364373	0.389911	0.414191	0.423101	0.456227	16	19302903
cg03573196	0.00138091	-1.223	0.114498	0.127058	0.118287	0.11316	0.109505	0.135145	0.138208	0.152718	12	25205260
cg03576419	0.00315423	-1.27347	0.0996509	0.0857268	0.0990571	0.105574	0.0970393	0.121082	0.134573	0.117519	2	183731676
cg03580272	0.00174619	-1.17089	0.440445	0.48351	0.478983	0.46619	0.46037	0.529656	0.559814	0.547559	19	15725455
cg03585096	0.00476617	-1.22029	0.540631	0.507407	0.531344	0.551038	0.476811	0.606699	0.666187	0.635729	13	20287930
cg03590668	0.00822934	-1.31271	0.132119	0.120007	0.124353	0.124861	0.111506	0.163168	0.177265	0.142899	16	1660113
cg03592903	0.00113701	-1.20353	0.531316	0.533021	0.513263	0.472278	0.511281	0.578008	0.627627	0.639054	5	33737936
cg03593419	0.0079027	-1.1641	0.0711168	0.0697004	0.0758296	0.0760309	0.0696167	0.0829893	0.0812786	0.0887552	4	46995474
cg03593823	0.000400292	-1.39387	0.274778	0.286576	0.291128	0.292997	0.291291	0.399377	0.439438	0.364964	1	240690404
cg03599037	0.00294283	-1.14191	0.422265	0.419459	0.405524	0.413992	0.376465	0.451402	0.44415	0.495638	10	82172508
cg03602746	0.000955951	-1.11875	0.64194	0.660859	0.608104	0.643104	0.61709	0.688403	0.711321	0.7244	2	187867895
cg03603381	0.00755075	-1.11737	0.492394	0.509474	0.471591	0.493414	0.518761	0.549622	0.535985	0.578062	15	38857474
cg03606772	0.00267005	-1.25197	0.19373	0.17744	0.17628	0.187745	0.170319	0.223656	0.207903	0.246675	1	152487856
cg03607513	0.00842688	-1.47673	0.0568666	0.0752444	0.0669815	0.0469806	0.0571429	0.0803324	0.082555	0.104965	11	94707155
cg03607951	0.00605252	-1.43498	0.356924	0.294675	0.306751	0.410579	0.305222	0.497213	0.48429	0.461328	1	79085586
cg03608205	0.00136683	-1.12621	0.687921	0.65126	0.621041	0.617689	0.619686	0.680684	0.721264	0.750649	12	96798663
cg03610217	0.00681273	-1.10193	0.66116	0.611952	0.593176	0.585974	0.567518	0.656917	0.633767	0.696837	2	232490611
cg03610852	0.00516579	-1.30277	0.113283	0.0968681	0.117361	0.127496	0.116684	0.160583	0.139977	0.147503	8	65287050
cg03612060	0.00479801	-1.2806	0.0438937	0.0489293	0.0518891	0.0517304	0.060399	0.065657	0.0718066	0.0608245	1	110528077
cg03613050	0.00972484	-1.12481	0.684026	0.727915	0.763049	0.701774	0.758838	0.819175	0.805841	0.831196	1	4121071
cg03617420	0.00619353	-1.14763	0.296073	0.285706	0.307362	0.28105	0.293985	0.326846	0.324955	0.355098	8	10916666
cg03617902	0.00269471	-1.3013	0.0168594	0.0185114	0.0165175	0.017237	0.0151018	0.0231808	0.0204913	0.0219863	11	118868795
cg03617986	0.0068725	-1.22247	0.061143	0.0587051	0.0612838	0.0576541	0.0614488	0.0801026	0.0681679	0.0720617	15	96960998
cg03618705	0.000842467	-1.10791	0.601972	0.618235	0.610644	0.599393	0.626339	0.663252	0.677747	0.689915	5	5268391
cg03619973	0.00418227	-1.26942	0.0935163	0.0966709	0.10001	0.0950103	0.112405	0.120303	0.133226	0.126074	5	121414025
cg03624449	0.0014884	-1.13053	0.720426	0.694247	0.638224	0.608065	0.6558	0.731523	0.729997	0.778009	22	45408588
cg03624881	0.00623781	-1.30423	0.0747702	0.0884967	0.090945	0.0749703	0.0779881	0.110224	0.101156	0.107166	17	10600507
cg03625415	0.0041169	-1.28911	0.200976	0.206328	0.210612	0.24504	0.202392	0.286757	0.263649	0.274765	5	172662741
cg03625512	0.000253824	-1.15951	0.691883	0.661281	0.666605	0.658764	0.635849	0.772421	0.749872	0.780273	12	125569850
cg03627022	0.00779193	-1.27977	0.0676669	0.0585721	0.0600162	0.066012	0.0702319	0.0808989	0.0773043	0.0891855	6	109702729
cg03627290	0.00647409	-1.11517	0.283744	0.274944	0.266366	0.268106	0.280383	0.288006	0.303969	0.324559	2	219155248
cg03627295	0.000619113	-1.24214	0.189266	0.193662	0.194077	0.196288	0.203665	0.236376	0.235495	0.255869	13	46756439
cg03628650	0.00299156	-1.25342	0.172403	0.202245	0.178421	0.190192	0.168836	0.229475	0.225162	0.230512	13	53726304
cg03628719	0.00393565	-1.31912	0.0982697	0.115252	0.106481	0.0914925	0.0942323	0.138025	0.122803	0.138513	15	89438964
cg03630419	0.00377976	-1.10003	0.710657	0.716741	0.744411	0.723576	0.737666	0.787089	0.7844	0.826272	20	2743999
cg03630578	0.00105671	-1.36533	0.0230163	0.0208333	0.0240202	0.0245015	?	0.0311967	0.0316763	0.0322524	1	52344676
cg03631215	0.00432	-1.13201	0.634908	?	0.690268	0.684338	0.648061	0.772968	0.74362	0.727376	16	84004855
cg03635682	0.00888723	-1.10311	0.544446	0.521435	0.512909	0.512789	0.472624	0.550181	0.564801	0.577334	9	97987490
cg03638940	0.0023302	-1.16811	0.130208	0.140362	0.129328	0.136503	0.132686	0.150786	0.162145	0.15581	12	58149384
cg03640051	0.00750716	-1.26215	0.228626	0.211855	0.236108	0.1931	0.203012	0.271295	0.248601	0.290391	4	42657689
cg03641264	0.00535534	-1.10667	0.647909	0.611949	0.616661	0.638403	0.602601	0.66504	0.696567	0.705777	12	7998837
cg03643998	0.000696242	-1.38913	0.132503	0.157189	0.15574	0.146379	0.144994	0.195162	0.205061	0.213709	17	77042455
cg03645051	0.00524695	-1.1133	0.706438	0.704371	0.686094	0.723886	0.699163	0.748065	0.77451	0.82467	11	28978110
cg03649238	0.00559025	-1.17944	0.0807218	0.0809279	0.0918824	0.0873074	0.08901	0.104217	0.0966575	0.103937	1	16940053
cg03649606	0.00774829	-1.11677	0.576676	0.619128	0.595441	0.559597	0.561573	0.622783	0.631361	0.690867	16	89501735
cg03650729	0.00459594	-1.19981	0.472503	0.439899	0.491607	0.495197	0.469249	0.543644	0.56263	0.599066	1	47692625
cg03651292	0.00775378	-1.16324	0.477781	0.475625	0.454749	0.442943	0.46588	0.526492	0.487464	0.5962	18	14999803
cg03652456	0.00078644	-1.13527	0.583835	0.606898	0.571701	0.5737	0.541282	0.651785	0.635676	0.667763	6	1670293
cg03655683	0.00484755	-1.16853	0.0956511	0.0969124	0.099071	0.092484	0.0913372	0.113784	0.103154	0.115828	2	63281383
cg03658699	0.00502856	-1.20942	0.286941	0.31676	0.3077	0.311674	0.285645	0.345959	0.353778	0.392943	19	4564376
cg03660502	0.00114886	-1.3086	0.0645848	0.0557627	0.0701863	0.0686622	0.0622343	0.0876467	0.084419	0.0809757	16	28948092
cg03662467	0.00688509	-1.21371	0.0696066	0.0766407	0.0749455	0.0800493	0.0764056	0.0852092	0.0935269	0.0962919	18	43753538
cg03665249	0.00631659	-1.11032	0.583073	0.635408	0.611069	0.636372	0.599311	0.681334	0.683636	0.678005	2	220649290
cg03665259	0.00230205	-1.19679	0.0808639	0.0731501	0.084258	0.0870617	0.0923935	0.104892	0.101102	0.095339	6	31021826
cg03666309	0.000101906	-1.1314	0.557649	0.54205	0.562109	0.554979	0.5487	0.623111	0.618382	0.635545	19	39234827
cg03668240	0.000776608	-1.16358	0.58677	0.604995	0.556407	0.583079	0.548087	0.681423	0.653571	0.671743	15	52581908
cg03669292	0.0062497	-1.18461	0.102521	0.10765	0.10436	0.103993	0.119864	0.128182	0.129113	0.125916	16	30087955
cg03670153	0.00575247	-1.33276	0.0794387	0.101051	0.101446	0.103097	0.117544	0.135661	0.134948	0.132483	3	184079754
cg03671052	0.00582239	-1.67432	0.317757	0.358514	0.209103	0.189593	0.294076	0.34327	0.417132	0.615276	5	180086260
cg03679955	0.00724851	-1.14337	0.215635	0.205013	0.241356	0.235823	0.240362	0.256168	0.265153	0.262321	9	138090903
cg03680945	0.00629593	-1.13773	0.659011	0.635364	0.630866	0.654813	0.579869	0.709774	0.694509	0.747636	20	48313885
cg03693197	0.00445632	-1.17247	0.620663	0.580818	0.630574	0.644142	0.644553	0.74346	0.696739	0.756952	12	54516619
cg03693585	0.00229124	-1.13649	0.463199	0.453668	0.436099	0.47672	0.4382	0.511513	0.510299	0.523124	3	14845796
cg03693943	0.00147822	-1.18221	0.0196717	0.020352	?	0.0233115	0.0218105	0.0259581	0.0262927	0.0243619	9	4985152
cg03695147	0.00944837	-1.19042	0.12659	0.117401	0.125338	0.119131	0.11088	0.13984	0.151844	0.136544	16	67212457
cg03696277	0.00489186	-1.15879	0.534325	0.567894	0.601538	0.602165	0.565141	0.641963	0.685792	0.671756	6	46460186
cg03696346	0.000751485	-1.15263	0.202829	0.216804	0.201319	0.203966	0.195261	0.232166	0.226342	0.245192	10	44101789
cg03697708	0.00767798	-1.39618	0.100187	0.119805	0.0791506	0.115074	0.102881	0.140585	0.141682	0.150078	19	13617549
cg03698765	0.00529907	-1.30042	0.0883928	0.0799316	0.0779892	0.0867308	0.0808395	0.0980571	0.117201	0.107517	19	30096646
cg03701045	0.00919264	-1.17399	0.510808	0.595752	0.481481	0.484886	0.504302	0.584118	0.600951	0.622729	6	30955142
cg03702043	0.00918556	-1.14999	0.501668	0.54204	0.545107	0.532889	0.545497	0.588534	0.598834	0.651697	4	190861082
cg03705947	0.004342	-1.24631	0.0968892	0.115869	0.116194	0.119196	0.123642	0.139895	0.146111	0.142664	1	68152081
cg03714754	0.00230468	-1.1497	0.517732	0.509219	0.488655	0.478261	0.521413	0.58184	0.55065	0.599051	15	68993073
cg03718279	0.00542251	-1.51448	0.100047	0.0944649	0.108113	0.113017	0.103457	0.132978	0.159729	0.178785	1	53704425
cg03719032	0.00639883	-1.29393	0.121639	0.144793	0.143034	0.1277	0.153267	0.172143	0.178911	0.18517	19	19374710
cg03719070	0.00683954	-1.27329	0.259971	0.255297	0.210481	0.194254	0.239428	0.28717	0.252144	0.340231	2	74668976
cg03719092	0.00453488	-1.34669	0.164924	0.162008	0.146681	0.176582	0.191606	0.22792	0.216135	0.236147	8	70744881
cg03722757	9.18835e-05	-1.12141	0.528816	0.532647	0.508711	0.521759	0.532398	0.58481	0.586718	0.5928	17	80188275
cg03723251	0.00945824	-1.10233	0.74964	0.746832	0.7673	0.801257	0.728187	0.823965	0.83522	0.850282	3	191600335
cg03723907	0.00383764	-1.12756	0.530098	0.546901	0.554161	0.553398	0.56726	0.593801	0.633811	0.634936	5	61262350
cg03723935	0.00556919	-1.82999	0.197557	0.107219	0.225659	0.194313	0.286058	0.356301	0.384598	0.366272	19	485984
cg03725414	0.00356869	-1.14033	0.642789	0.690798	0.684194	0.679856	0.687686	0.753396	0.75613	0.80557	16	84862964
cg03726209	0.00303637	-1.31802	0.205581	0.25443	0.224513	0.208381	0.22821	0.280376	0.287271	0.317059	4	186509045
cg03726556	0.00455405	-1.20168	0.200681	0.17967	0.202552	0.197912	0.182367	0.227209	0.225874	0.241024	2	119607379
cg03729462	0.00707664	-1.12631	0.565053	0.538544	0.556342	0.575127	0.525778	0.5976	0.626389	0.640178	4	189931880
cg03730204	0.00690182	-1.65037	0.0560895	0.070409	0.0839789	0.078252	0.0579821	0.134336	0.120169	0.0889149	X	103727679
cg03730474	0.00175724	-1.43548	0.189823	0.211094	0.189063	0.195556	0.197669	0.284726	0.244956	0.315601	19	15695817
cg03731303	0.00624103	-1.17852	0.178103	0.199954	0.199445	0.183205	0.192465	0.214812	0.226371	0.23245	3	181443009
cg03732293	0.00796542	-1.29102	0.0776957	0.0975309	0.104014	0.0892909	0.0995932	0.124602	0.117774	0.120973	1	179335087
cg03732900	0.0039394	-1.11435	0.611234	0.623917	0.623379	0.623349	0.643798	0.683036	0.678136	0.72726	10	3527996
cg03740162	0.00783327	-1.25468	0.0657222	0.0706688	0.0705786	0.0751439	0.0843796	0.0890987	0.0933127	0.0940377	9	1050680
cg03740761	0.00909747	-1.18756	0.333597	0.331761	0.32398	0.303349	0.348205	0.378306	0.36217	0.425207	20	47237270
cg03743580	0.00901759	-1.13416	0.57722	0.567469	0.561602	0.615882	0.572541	0.656116	0.628151	0.684303	4	4763753
cg03744566	0.00651235	-1.35041	0.0638968	0.0533333	0.0670043	0.0692808	0.0562683	0.0920524	0.0811832	0.0783841	7	27224030
cg03744617	0.00691451	-1.24843	0.0531313	0.0660186	0.0605447	0.0576923	0.0547082	0.0711185	0.0724746	0.0749083	1	29063177
cg03745755	0.00822159	-1.20809	0.352916	0.374867	0.388871	0.359088	0.409444	0.431797	0.456027	0.478884	15	31780528
cg03747309	0.0088666	-1.26657	0.133924	0.153388	0.150614	0.147358	0.12416	0.170516	0.172588	0.194808	16	3740662
cg03747695	0.00648323	-1.33459	0.0566086	0.0762868	0.0616541	0.0607386	0.0657867	0.0845231	0.0817026	0.090379	19	44716642
cg03748951	0.00624035	-1.13807	0.684129	0.616655	0.6707	0.662853	0.627449	0.736584	0.759982	0.731967	9	136284475
cg03750324	0.00537433	-1.12916	0.349503	0.318418	0.300214	0.315298	0.308874	0.340771	0.346852	0.386046	2	113699617
cg03754403	0.00379797	-1.25109	0.152689	0.156927	0.170077	0.16987	0.170703	0.217884	0.189445	0.209387	6	40567579
cg03760878	0.00472761	-1.11658	0.474299	0.507077	0.478871	0.508272	0.47649	0.534565	0.546901	0.555407	17	65356838
cg03762820	0.00880244	-1.19265	0.0593327	0.0624904	0.0810535	0.0690104	0.0758437	0.0856102	0.0872266	0.0777522	2	43823654
cg03764226	0.00776771	-1.19154	0.501624	0.467684	0.486499	0.4983	0.422958	0.548114	0.552344	0.595256	20	30942880
cg03765885	0.000578982	-1.13371	0.587421	0.596416	0.577875	0.557604	0.558024	0.637741	0.621777	0.691381	2	119571674
cg03766753	0.00485906	-1.12176	0.494505	0.517958	0.507335	0.497887	0.482854	0.574385	0.532406	0.573933	17	18615936
cg03770147	0.00775664	-1.18371	0.0895626	0.0916062	0.0844909	0.0877653	0.0876792	0.0933867	0.102683	0.115922	2	208029836
cg03770217	0.00966561	-1.18653	0.378274	0.359716	0.368739	0.379338	0.358603	0.470947	0.40334	0.438868	12	111805938
cg03774275	0.00584146	-1.18908	0.491239	0.531644	0.518081	0.48555	0.540707	0.614023	0.574774	0.64072	11	125221142
cg03776935	0.00977288	-1.10332	0.573227	0.629838	0.568695	0.561545	0.5525	0.609568	0.634386	0.659727	9	99773358
cg03784270	0.00790041	-1.20735	0.318891	0.291244	0.319971	0.302535	0.290186	0.336453	0.373939	0.390924	3	152661655
cg03785619	0.00162193	-1.31105	0.307271	0.26827	0.279703	0.273539	0.29439	0.386785	0.38764	0.346289	12	54373040
cg03785828	0.00797097	-1.3294	0.203761	0.272015	0.202348	0.192241	0.214581	0.265588	0.276357	0.319436	5	81573306
cg03787988	0.000412213	-1.11208	0.653941	0.675988	0.637139	0.650019	0.631968	0.697256	0.715819	0.749583	11	10602522
cg03792876	0.00239124	-1.13036	0.628015	0.639796	0.638125	0.599615	0.660476	0.716016	0.718769	0.71262	16	73243
cg03793834	0.00584476	-1.2211	0.245548	0.282243	0.294143	0.28091	0.266179	0.340745	0.320657	0.342481	5	63801660
cg03794030	0.00978002	-1.28604	0.0592192	0.0738759	0.0670719	0.0761276	0.0690542	0.0896533	0.0836025	0.0932622	17	34900597
cg03799192	0.00648712	-1.11295	0.565616	0.531693	0.531762	0.546313	0.541561	0.604153	0.572606	0.633905	1	232107358
cg03802191	0.00599933	-1.10024	0.625714	0.637834	0.641097	0.633728	0.658807	0.68921	0.686943	0.733108	1	234615169
cg03802998	0.00658369	-1.21118	0.382821	0.359174	0.336073	0.364379	0.302092	0.408157	0.392198	0.461209	11	44972744
cg03804128	0.00718089	-1.21933	0.325941	0.385171	0.368843	0.35963	0.407322	0.455988	0.468778	0.429974	16	635623
cg03805410	0.00394027	-1.33578	0.0516423	0.0654197	0.0565253	0.056982	0.061451	0.082777	0.0769231	0.0745203	22	42487359
cg03807711	0.00776502	-1.16674	0.069161	0.0642775	0.0675402	0.0734443	0.0767837	0.0818142	0.0868129	0.0781293	17	47492440
cg03810165	0.00966641	-1.18257	0.485898	0.438932	0.445568	0.497803	0.456731	0.527618	0.534535	0.585081	10	4021124
cg03811260	0.00858309	-1.31704	0.0653924	0.085518	0.0798608	0.0692245	0.072066	0.102152	0.0942784	0.0974918	16	67198215
cg03817919	0.00864524	-1.13523	0.608597	0.5391	0.57858	0.582393	0.556442	0.632392	0.651102	0.666497	1	40446531
cg03818920	0.00930477	-1.28962	0.0659306	0.0852424	0.0866515	0.0801347	0.0878044	0.105555	0.101545	0.107389	6	84562778
cg03822365	0.00658061	-1.24893	0.0599289	0.0603811	0.0574848	0.0638637	0.067366	0.0719038	0.0773326	0.0822144	2	213403275
cg03824122	0.00466543	-1.17301	0.0538562	0.0591893	0.0534378	0.0535209	0.052585	0.0609527	0.0666626	0.063911	10	38147123
cg03824523	0.00271172	-1.10151	0.513353	0.506863	0.457904	0.48742	0.478014	0.53952	0.518561	0.551632	2	223601211
cg03829318	0.00501774	-1.31845	0.0529333	0.0497769	0.054899	0.0604919	0.0621503	0.0752591	0.0690736	0.077686	13	24462838
cg03832000	0.00783703	-1.13297	0.705801	0.716698	0.708318	0.732333	0.646932	0.793119	0.769154	0.820011	2	481482
cg03832288	0.00106007	-1.12114	0.644472	0.632541	0.654921	0.628605	0.61744	0.72823	0.70475	0.704956	3	37329077
cg03835785	0.00998607	-1.10321	0.489238	0.524207	0.523622	0.516863	0.532725	0.571162	0.554396	0.587076	1	160158807
cg03836586	0.00932155	-1.47813	0.126777	0.176097	0.164785	0.16306	0.124592	0.234118	0.200883	0.234503	7	8477597
cg03839589	0.00659994	-1.10027	0.694983	0.737068	0.723196	0.72849	0.725694	0.763643	0.813422	0.805774	9	98872734
cg03841623	0.00254769	-1.19137	0.429878	0.44677	0.412815	0.424942	0.390705	0.459669	0.494994	0.544078	7	4519161
cg03843317	0.00430338	-1.29509	0.315545	0.275993	0.333498	0.269165	0.30561	0.394002	0.381406	0.390417	7	27222623
cg03844826	0.00382057	-1.19049	0.555084	0.552148	0.602983	0.547209	0.514752	0.664346	0.655667	0.660241	4	187609604
cg03845363	0.00169327	-1.3333	0.288649	0.288898	0.297474	0.242787	0.281502	0.355371	0.388331	0.374663	17	17753516
cg03847470	0.00585693	-1.41592	0.125929	0.137216	0.149125	0.127533	0.114497	0.188285	0.162588	0.204159	11	128556580
cg03849927	0.00514261	-1.38111	0.111018	0.12133	0.113539	0.139888	0.110846	0.181291	0.161555	0.152424	1	67396905
cg03861021	0.00354048	-1.2335	0.0895522	0.0793496	0.0776463	0.0861828	0.0855414	0.10063	0.098458	0.109885	17	3539210
cg03865596	0.00660343	-1.21242	0.622354	0.575637	0.540312	0.547514	0.533017	0.628777	0.725866	0.690149	6	39792251
cg03866447	0.00740153	-1.17867	0.628762	0.562046	0.491781	0.533653	0.499263	0.583701	0.638678	0.685923	10	60723029
cg03868882	0.00940751	-1.16574	0.274891	0.234905	0.258848	0.252242	0.241084	0.289711	0.291012	0.300982	19	12098180
cg03869608	0.00661931	-1.40037	0.101057	0.0814039	0.0895491	0.106925	0.113184	0.146729	0.129018	0.138344	3	73674656
cg03873659	0.00995247	-1.21936	0.0585414	0.066527	0.0672483	0.0662379	0.0729802	0.0838415	0.0763963	0.0827362	3	123304056
cg03875111	0.0080826	-1.13495	0.497081	0.519598	0.581362	0.594848	0.58553	0.634314	0.63419	0.631742	22	39889372
cg03876085	0.00433068	-1.11247	0.621204	0.633686	0.615394	0.581837	0.579627	0.641505	0.684075	0.692538	21	46856099
cg03877680	0.0033419	-1.39531	0.0190885	0.0210229	0.0201016	0.0175784	0.0154467	0.0230098	0.0253069	0.0294636	5	178157825
cg03878603	0.00653974	-1.10634	0.650331	0.677657	0.664793	0.695089	0.680305	0.719484	0.746075	0.769757	2	118270232
cg03887755	0.006956	-1.18942	0.49808	0.596959	0.618326	0.592525	0.606438	0.710587	0.697076	0.677439	10	133811587
cg03888579	0.00959497	-1.50313	0.0239332	0.0222645	0.0262785	0.0267845	0.0252351	0.0321096	0.0355049	0.0445719	1	35331832
cg03893507	0.000471357	-1.36084	0.0716173	0.0697705	0.07043	0.0701472	0.059117	0.090157	0.0925217	0.0954389	13	22051438
cg03894068	0.00822112	-1.10709	0.536281	0.570031	0.511715	0.52867	0.50532	0.589254	0.586741	0.581897	20	19955537
cg03894990	0.00357685	-1.16696	0.445442	0.476213	0.448533	0.479483	0.472679	0.520442	0.533939	0.569967	6	44309765
cg03897101	0.0093367	-1.34887	0.103036	0.0938595	0.0873946	0.102862	0.084464	0.128678	0.107548	0.144156	19	45271271
cg03898302	0.00604773	-1.10666	0.61333	0.649596	0.63251	0.628409	0.625786	0.663542	0.707635	0.717955	8	144188045
cg03899372	0.00550384	-1.26941	0.054133	0.0608957	0.0651902	0.0667453	0.0718485	0.0780403	0.0901878	0.0757489	1	207224102
cg03901846	0.00222199	-1.22212	0.243799	0.233399	0.23565	0.274336	0.253971	0.303657	0.309878	0.298351	17	15884729
cg03903988	0.000527003	-1.36498	0.278129	0.257211	0.266869	0.243103	0.282121	0.351941	0.348466	0.385396	12	12161510
cg03904891	0.00173255	-1.12848	0.685309	0.642442	0.607948	0.601043	0.600887	0.697932	0.700127	0.718952	6	14766810
cg03905005	0.00689427	-1.13393	0.623074	0.664396	0.584907	0.577422	0.641009	0.690408	0.684424	0.721688	17	48912591
cg03915704	0.00246163	-1.57923	0.060375	0.0684194	0.0726521	0.0726612	0.0749414	0.120853	0.0950582	0.114912	1	40851486
cg03916430	0.00536891	-1.11404	0.596407	0.625924	0.637762	0.612795	0.637913	0.6685	0.709594	0.702407	6	30799674
cg03919650	0.00333243	-1.22216	0.46534	0.406107	0.419491	0.430292	0.408522	0.534392	0.488735	0.536048	16	3306855
cg03920301	0.00858153	-1.10742	0.643328	0.609514	0.576845	0.630669	0.623216	0.671032	0.672882	0.701464	11	79167349
cg03922948	0.00145549	-1.228	0.484043	0.457727	0.463935	0.463476	0.484667	0.550019	0.557814	0.623203	5	2675830
cg03927062	0.00640066	-1.26873	0.0569301	0.054698	0.0586758	0.0486966	0.0618268	0.0689774	0.0728072	0.0719895	2	105488922
cg03932398	0.00378836	-1.25247	0.0568302	0.0618421	0.0558933	0.056807	0.0653221	0.0709769	0.0749029	0.0769057	20	1206703
cg03934713	0.000397165	-1.3369	0.120886	0.12069	0.114955	0.105629	0.107163	0.145883	0.138388	0.170667	16	6069198
cg03934865	0.00846501	-1.20906	0.0696397	0.0799351	0.068581	0.0737053	0.0803914	0.0911387	0.0879989	0.0907975	2	198174659
cg03946530	0.00709031	-1.32282	0.064183	0.0739222	0.0780758	0.066824	0.0721423	0.0846639	0.0966685	0.100405	15	65596423
cg03948510	0.00732519	-1.11734	0.665804	0.643739	0.680991	?	0.680058	0.75751	0.724116	0.760189	16	84985010
cg03952484	0.00425772	-1.1795	0.0783226	0.0783632	0.0780902	0.0842677	0.0769749	0.0926175	0.0886721	0.0986871	1	149899818
cg03952977	0.00111133	-1.33062	0.0722708	0.0841376	0.0863869	0.0905123	0.0801558	0.11542	0.108374	0.106967	X	49969377
cg03953714	0.00915209	-1.25493	0.071671	0.0627348	0.0655999	0.0748841	0.0657595	0.0795272	0.0845271	0.0921171	17	40915656
cg03954667	0.0046539	-1.41949	0.0442842	0.0463174	0.0523568	0.0509895	0.0451128	0.0783424	0.0629991	0.0626763	12	11806065
cg03955767	0.000197244	-1.11232	0.447791	0.462123	0.465602	0.468153	0.45578	0.509034	0.521263	0.505775	17	5603961
cg03959347	0.00991862	-1.10344	0.087745	0.0895091	0.088922	0.0956164	0.0918872	0.105989	0.0999319	0.095289	10	60273059
cg03962200	0.00201913	-1.11233	0.692338	0.690789	0.696282	0.713048	0.722258	0.75799	0.789159	0.799069	22	31518707
cg03962316	0.00637645	-1.11648	0.724686	0.716754	0.676144	0.72523	0.713409	0.750191	0.792605	0.834105	12	82892515
cg03963494	0.00223589	-1.32063	0.0539879	0.0488679	0.0522498	0.0540295	0.0510726	0.064019	0.0749851	0.0673281	10	105156690
cg03965713	0.00222922	-1.11492	0.698059	0.664399	0.667808	0.652283	0.633035	0.730861	0.745157	0.738702	7	75535762
cg03969724	0.00321609	-1.12246	0.47651	0.489145	0.481008	0.488323	0.494903	0.525473	0.536344	0.572763	1	6114997
cg03973036	0.00658007	-1.32345	0.0524135	0.052904	0.0637769	0.0588738	0.0504568	0.0703219	0.0728031	0.0780583	2	121071002
cg03975690	0.00163827	-1.31702	0.0490692	0.0603725	0.067893	0.063675	0.0691625	0.0838715	0.085027	0.0772928	7	87848292
cg03981617	0.00303225	-1.11459	0.694192	0.693962	0.775	0.74186	0.757086	0.807869	0.834997	0.813446	2	3082064
cg03982074	0.00352453	-1.10581	0.561219	0.609866	0.577532	0.574349	0.571721	0.632075	0.628607	0.657099	7	100612875
cg03982483	0.00517045	-1.16127	0.434583	0.392386	0.420127	0.437307	0.404637	0.482918	0.471446	0.500627	17	7018066
cg03988297	0.00211419	-1.11147	0.54725	0.559227	0.562316	0.54673	0.554972	0.594234	0.635446	0.617891	1	219060547
cg03992022	0.00497451	-1.30143	0.0882952	0.0812054	0.0716107	0.0773775	0.0823675	0.0949319	0.0945353	0.121943	16	57770483
cg03992230	0.000670704	-1.28895	0.0524501	0.0534334	0.0539736	0.0582531	0.058018	0.0733911	0.0677873	0.0725686	5	179050530
cg03994721	0.00154526	-1.12688	0.618192	0.595153	0.586355	0.613409	0.578991	0.650497	0.668868	0.699913	9	96706555
cg03995228	0.00925159	-1.20903	0.0703883	0.0813244	0.0683725	0.067741	0.0617034	0.0762592	0.0845053	0.0913771	2	219263974
cg03996020	0.00791709	-1.21076	0.507281	0.448803	0.478863	0.434107	0.404088	0.544052	0.542933	0.560107	7	157180124
cg03996822	0.00106541	-1.14926	0.480486	0.456047	0.483074	0.49873	0.474815	0.569349	0.54021	0.543032	4	74486558
cg03997105	0.00839288	-1.37287	0.239732	0.206682	0.180485	0.172393	0.150472	0.27729	0.230461	0.270912	16	54404570
cg03998605	0.00589161	-1.25406	0.0930636	0.0997739	0.111523	0.103051	0.109939	0.123752	0.128444	0.137509	8	21882061
cg04000047	0.00289496	-1.17464	0.142434	0.137269	0.150268	0.144012	0.134487	0.172828	0.16243	0.164518	1	11822362
cg04003136	0.00734355	-1.14033	0.112315	0.108257	0.10464	0.108032	0.099531	0.125503	0.114126	0.124025	2	177052903
cg04006520	0.00149228	-1.10531	0.611876	0.622873	0.581861	0.608223	0.603099	0.642024	0.662391	0.698748	12	2660504
cg04015122	0.00531729	-1.10315	0.795031	0.834256	0.767631	0.779337	0.774994	0.871666	0.886762	0.853968	6	70040888
cg04015972	0.0047381	-1.16974	0.121808	0.10908	0.11446	0.115552	0.117431	0.129078	0.133529	0.142719	3	50540221
cg04018448	0.00531618	-1.33042	0.0702883	0.0827649	0.0622783	0.0763221	0.0668322	0.0854311	0.0938683	0.105761	16	2246498
cg04021592	0.00786879	-1.42231	0.132005	0.0988512	0.158315	0.135275	0.13237	0.213974	0.18097	0.167609	2	145280784
cg04022379	0.00815411	-1.3683	0.0810705	0.0780364	0.0762653	0.0767677	0.0831288	0.0900166	0.111203	0.122539	5	110408740
cg04024417	0.00398435	-1.13003	0.679388	0.656899	0.689938	0.675111	0.624932	0.739665	0.746065	0.767609	7	96294348
cg04026012	0.00896966	-1.31272	0.0781571	0.0802	0.0742464	0.0706439	0.0738883	0.110713	0.0980679	0.0884409	6	86354018
cg04027576	7.95233e-05	-1.25538	0.365288	0.383007	0.396885	0.379612	0.405488	0.486578	0.48457	0.484419	9	117996948
cg04034517	0.00441188	-1.15602	0.508997	0.49697	0.504193	0.498331	0.504637	0.56352	0.547951	0.627672	10	76262877
cg04039144	0.00506006	-1.13471	0.574014	0.60249	0.572337	0.576776	0.610836	0.672042	0.63385	0.690996	16	56566831
cg04041654	0.00544213	-1.18859	0.559438	0.516376	0.500162	0.519485	0.45152	0.587025	0.608575	0.615508	1	183579470
cg04044187	0.00828236	-1.10233	0.701439	0.695481	0.744864	0.720558	0.681891	0.766162	0.80229	0.777963	3	172571826
cg04044594	0.00945967	-1.13065	0.507329	0.52121	0.532746	0.567331	0.527643	0.60557	0.578886	0.61892	5	43274936
cg04047050	0.00980706	-1.11094	0.619241	0.628924	0.663431	0.673503	0.659017	0.704478	0.71269	0.747353	13	19267410
cg04050646	0.00756187	-1.20656	0.504822	0.494613	0.456016	0.455882	0.49897	0.544764	0.623092	0.57488	3	48936775
cg04051206	0.00578447	-1.14943	0.706089	0.713914	0.641521	0.716242	0.671402	0.792069	0.741617	0.83777	17	17750855
cg04053099	0.00646401	-1.61713	0.0570253	0.0672489	0.074943	0.0708707	0.078537	0.106383	0.0994969	0.132348	3	122513601
cg04053901	0.00183086	-1.26987	0.243031	0.258667	0.243921	0.220582	0.202676	0.27849	0.287368	0.320938	10	100055407
cg04056813	0.000727899	-1.1099	0.522278	0.533162	0.521054	0.517805	0.527526	0.564175	0.573143	0.605842	1	204400425
cg04057147	0.00226372	-1.24614	0.526979	0.474694	0.58405	0.51943	0.576593	0.682202	0.66716	0.661154	5	79487759
cg04058169	0.00113848	-1.14667	0.687211	0.652538	0.644836	0.667972	0.68861	0.781002	0.751017	0.766407	10	124913438
cg04062767	0.00625714	-1.1056	0.536189	0.577128	0.565549	0.547127	0.544437	0.591791	0.614503	0.629447	12	130958162
cg04063166	0.00697963	-1.15225	0.46077	0.457251	0.497212	0.494824	0.476694	0.521662	0.559575	0.57024	11	30034452
cg04064028	0.00640956	-1.11366	0.430266	0.437343	0.374454	0.407885	0.415953	0.450144	0.450185	0.474966	2	170335723
cg04064160	0.00230824	-1.19974	0.312356	0.287179	0.296625	0.267488	0.288236	0.339568	0.33108	0.371278	8	26048065
cg04068865	0.00445451	-1.10523	0.648066	0.61756	0.654773	0.627279	0.638353	0.691083	0.69073	0.729432	2	97481069
cg04070377	0.00824815	-1.5108	0.0331974	0.0362227	0.0333333	0.0482318	0.0352916	0.0515907	0.0605179	0.0568613	1	238415825
cg04071830	0.000997504	-1.10435	0.683552	0.696966	0.665082	0.685943	0.699361	0.756075	0.73931	0.775552	6	78636089
cg04078921	0.004947	-1.30717	0.0909404	0.0997036	0.0902298	0.0917412	0.0885766	0.108571	0.110709	0.140873	6	26285441
cg04079190	0.0023723	-1.11159	0.558985	0.601738	0.575433	0.578529	0.581302	0.634118	0.633794	0.661718	1	63420641
cg04079257	0.00925956	-1.29929	0.0981694	0.0884624	0.103644	0.115909	0.091022	0.139273	0.123962	0.125344	10	128110580
cg04086778	0.00427664	-1.34974	0.109218	0.109834	0.0961356	0.113632	0.114191	0.143681	0.161929	0.134665	6	6002190
cg04090027	0.00523403	-1.16892	0.0950242	0.0911473	0.111879	0.111005	0.109426	0.127264	0.119057	0.119224	2	97760622
cg04091063	0.00872954	-2.63426	0.0616477	0.113343	0.0922621	0.0827752	0.164767	0.350082	0.219141	0.234429	1	19615382
cg04091702	0.00431988	-1.13419	0.474807	0.449111	0.450857	0.420974	0.438287	0.47718	0.492908	0.54423	5	68711640
cg04092513	0.00478716	-1.2734	0.0228272	0.0197986	0.0228984	0.0270125	0.0233635	0.0314318	0.0308048	0.0267369	2	200819919
cg04096653	0.00651676	-1.13147	0.140485	0.125241	0.131447	0.129293	0.128397	0.143979	0.14558	0.154152	16	85171120
cg04099095	0.00261145	-1.13078	0.564771	0.607976	0.580402	0.556862	0.566191	0.649055	0.623094	0.675104	7	27278570
cg04099524	0.0059308	-1.24423	0.0576219	0.0579992	0.0683485	0.0624446	0.0624458	0.0827083	0.084977	0.064313	15	59785236
cg04100107	0.00974744	-1.3592	0.0784564	0.0833333	0.0923642	0.0741862	0.0958966	0.104672	0.117318	0.123947	12	77718289
cg04101969	0.00314461	-1.89166	0.0124606	0.0154787	0.0171132	0.0180975	0.0195279	0.0269977	0.0307009	0.0361302	13	20806477
cg04102199	0.00300707	-1.32124	0.118147	0.148261	0.138328	0.123607	0.131848	0.177641	0.172889	0.172794	12	94136269
cg04103021	0.00812169	-1.20619	0.367242	0.335512	0.319261	0.359405	0.338527	0.407515	0.379905	0.4533	4	174441703
cg04105250	0.00819458	-1.50486	0.0804227	0.0931988	0.117838	0.115727	0.138073	0.150772	0.196659	0.146521	2	171679114
cg04105923	0.00991628	-1.22474	0.344226	0.345286	0.371719	0.356644	0.372747	0.397056	0.444444	0.473714	6	106451610
cg04107037	0.00833399	-1.28137	0.0735798	0.0821749	0.0751186	0.0803203	0.0740437	0.110216	0.0941283	0.0921455	4	94750205
cg04107994	0.00217571	-1.14741	0.681968	0.655475	0.603963	0.659513	0.639674	0.726187	0.752676	0.748184	7	6209931
cg04108875	0.00936301	-1.14081	0.502572	0.560124	0.501754	0.529271	0.555343	0.603322	0.601918	0.607481	10	121353200
cg04112567	0.00386637	-1.18328	0.0599708	0.054602	0.0660648	0.0668714	0.0623524	0.0754218	0.0728343	0.0725461	1	9242340
cg04113632	0.00422243	-1.10769	0.634737	0.684016	0.622281	0.609121	0.610918	0.677224	0.701727	0.715505	11	67892272
cg04117356	0.00454911	-1.11211	0.617211	0.592267	0.567783	0.573204	0.536136	0.629819	0.642158	0.648518	17	4406024
cg04118045	4.36011e-06	-1.10272	0.729011	0.733475	0.708534	0.722089	0.714957	0.788835	0.786611	0.808751	16	54072225
cg04121555	0.00304456	-1.43402	0.0156937	0.0195639	0.0174052	0.0218553	0.0177515	0.0269598	0.0261571	0.0263399	14	51411515
cg04123409	0.00928686	-1.38652	0.320401	0.296652	0.300904	0.293865	0.261774	0.466377	0.363597	0.395273	12	113841617
cg04124763	0.00599084	-1.10912	0.771826	0.752737	0.755902	0.701198	0.751065	0.793299	0.836727	0.849141	19	6340856
cg04128045	0.000387091	-1.31606	0.0842045	0.0905847	0.0915621	0.0879971	0.0963753	0.118201	0.115241	0.122556	1	18435700
cg04128488	0.00217397	-1.20695	0.0748895	0.0778979	0.0808699	0.0871899	0.0922218	0.102333	0.101524	0.096463	18	8610485
cg04131799	0.0024735	-1.18472	0.175392	0.162832	0.18252	0.176747	0.173536	0.209049	0.198177	0.212268	2	97193006
cg04133572	0.00129637	-1.18779	0.0917096	0.0954688	0.0967685	0.0953427	0.0987164	0.111123	0.121266	0.108953	1	161195810
cg04136251	0.006207	-1.11921	0.738926	0.717527	0.719078	0.742136	0.686011	0.782308	0.83484	0.801891	3	77590560
cg04140048	0.00756215	-1.3662	0.217391	0.274621	0.261632	0.326306	0.290215	0.40331	0.361578	0.361639	10	90038832
cg04140614	0.00141474	-1.16847	0.0599918	0.0629676	0.0712086	0.0680731	0.0694782	0.0789795	0.0777095	0.0767377	2	96068327
cg04144394	0.000227328	-1.19841	0.0857673	0.0856078	0.0791413	0.0783719	0.0833408	0.0936311	0.0987593	0.103184	5	3594178
cg04148726	0.00177821	-1.17985	0.586937	0.537008	0.564816	0.573965	0.532874	0.640047	0.664945	0.672552	2	55310710
cg04148945	0.00535377	-1.11943	0.700995	0.655607	0.691315	0.691894	0.670158	0.75183	0.739423	0.796731	5	171474738
cg04150055	0.00954208	-1.16037	0.120887	0.113973	0.0930782	0.105246	0.0993365	0.113788	0.124	0.130553	9	133536855
cg04154424	0.00268766	-1.12198	0.668315	0.726133	0.719891	0.74277	0.720131	0.822286	0.825134	0.767222	5	17204524
cg04157201	0.00308637	-1.10784	0.124154	0.121492	0.118067	0.120192	0.118662	0.134982	0.125893	0.138742	1	170634177
cg04158140	0.0018983	-1.14746	0.487444	0.481049	0.486742	0.475352	0.498652	0.564065	0.529681	0.577296	7	71407448
cg04158698	0.00474327	-1.14885	0.609237	0.569926	0.60236	0.595847	0.550661	0.663207	0.650516	0.701455	1	201523041
cg04162223	0.00777183	-1.31463	0.348524	0.426222	0.416533	0.385491	0.427657	0.516108	0.48957	0.574204	13	114164207
cg04164415	0.00263984	-1.1434	0.0645023	0.0677659	0.0635511	0.0606607	0.0653398	0.0739647	0.0698082	0.076454	18	21199797
cg04166544	0.00687312	-1.12297	0.623311	0.692835	0.675058	0.677979	0.679838	0.78187	0.74278	0.735471	2	230580574
cg04166874	0.00127813	-1.48171	0.0594291	0.058933	0.0541823	0.0633468	0.066055	0.09848	0.0842028	0.085934	1	44821163
cg04167642	0.00266148	-1.12062	0.296226	0.280799	0.271033	0.254209	0.259685	0.301408	0.289725	0.320329	14	21341758
cg04168050	0.00248301	-1.69406	0.0482516	0.061621	0.0717015	0.0773861	0.0633077	0.0974369	0.117779	0.112279	1	220263278
cg04170211	4.35833e-05	-1.37198	0.0644915	0.0617716	0.0630032	0.0660726	0.0624431	0.0843696	0.090412	0.0868698	20	8001076
cg04179148	0.002515	-1.14598	0.598987	0.548554	0.560995	0.555865	0.527017	0.62667	0.624932	0.663079	14	94858339
cg04180481	0.00387422	-1.15074	0.508081	0.542749	0.528011	0.519003	0.503814	0.563835	0.596115	0.632604	16	7889838
cg04189591	0.00140757	-1.1357	0.470616	0.50272	0.453668	0.428513	0.438593	0.496674	0.508734	0.550383	22	42309398
cg04189988	0.00538771	-1.46079	0.047415	0.0534567	0.0763553	0.0588573	0.0795193	0.103172	0.0923855	0.082243	11	18127292
cg04192879	0.00944913	-1.32153	0.0779027	0.0952824	0.0889423	0.0836912	0.0737028	0.117508	0.100796	0.113869	5	92929473
cg04193602	0.00150546	-1.75554	0.31285	0.332274	0.236601	0.288841	0.197853	0.509652	0.396684	0.537245	2	69035029
cg04198440	0.00567895	-1.10863	0.72	0.736249	0.720044	0.692289	0.667177	0.762547	0.799256	0.786031	9	124133073
cg04209631	0.00294563	-1.30617	0.0496368	0.0558953	0.0463828	0.0443718	0.0543948	0.063641	0.0646925	0.0676856	11	93474517
cg04212445	0.00854534	-1.12662	0.339214	0.375775	0.338993	0.323247	0.338923	0.389301	0.372477	0.394999	19	11040284
cg04215126	0.00934954	-1.12785	0.478043	0.506607	0.502545	0.503747	0.467856	0.52707	0.556719	0.577926	7	105621846
cg04216953	0.00394743	-1.12869	0.372277	0.373969	0.360138	0.356876	0.360919	0.381429	0.409585	0.440332	11	111783874
cg04222466	0.00784329	-1.11661	0.65368	0.697248	0.675521	0.68484	0.703061	0.729506	0.769408	0.787652	5	151813212
cg04224786	0.00102487	-1.23617	0.482042	0.490921	0.467061	0.493262	0.516405	0.628458	0.576958	0.611592	8	144222401
cg04231643	0.00927635	-1.14716	0.492506	0.554031	0.48817	0.515987	0.47854	0.566215	0.551673	0.616835	11	1803975
cg04232256	0.00600744	-1.14178	0.431741	0.42556	0.403307	0.447517	0.420747	0.475607	0.466777	0.513192	15	76461479
cg04233747	0.00320718	-1.17047	0.0916662	0.0968329	0.0888203	0.0944425	0.10061	0.110633	0.109136	0.111898	5	145214971
cg04234132	0.00894898	-1.12044	0.505924	0.474672	0.482793	0.492704	0.459786	0.550892	0.513084	0.557395	19	47129558
cg04237429	0.00926447	-1.17759	0.223516	0.219795	0.228497	0.224909	0.229581	0.268226	0.242186	0.284413	22	50051110
cg04238096	0.000508135	-1.59651	0.0111757	0.00952309	0.00854823	0.00935149	0.0111104	0.0161131	0.0158044	0.0156918	5	61699834
cg04238097	0.00166845	-1.15294	0.60429	0.626266	0.621303	0.574946	0.621499	0.682561	0.713418	0.711089	11	104403216
cg04240077	0.00973785	-1.18562	0.0805486	0.0802835	0.0964956	0.0877805	0.0918361	0.107942	0.0991746	0.104731	17	71088962
cg04242132	0.00534263	-1.26732	0.0616984	0.0661985	0.0593123	0.0555028	0.0646721	0.0731052	0.0712141	0.088401	20	6058195
cg04246957	0.00499587	-1.16324	0.509026	0.484424	0.495336	0.488883	0.5026	0.61428	0.547679	0.569631	7	157696589
cg04249586	0.00256978	-1.11923	0.0980434	0.102959	0.108694	0.104592	0.10125	0.11538	0.116445	0.114896	4	111119946
cg04250661	0.00100373	-1.12805	0.761035	0.736216	0.719911	0.699343	0.71812	0.806208	0.8058	?	4	160199879
cg04251750	0.00257259	-1.24551	0.174392	0.195763	0.17827	0.178936	0.198149	0.220456	0.236003	0.234885	5	71015210
cg04256202	0.000849365	-1.24516	0.279402	0.254041	0.291045	0.291505	0.318479	0.369595	0.377183	0.329616	1	119546998
cg04256238	0.0020756	-1.10259	0.475945	0.505288	0.505074	0.500136	0.48823	0.547296	0.539373	0.550793	12	133198063
cg04258833	0.00407491	-1.11197	0.683883	0.708986	0.679838	0.665382	0.69271	0.790864	0.745861	0.751409	2	102697002
cg04259001	0.00351209	-1.11248	0.497127	0.486767	0.507547	0.487251	0.475616	0.531273	0.535888	0.568783	8	141097242
cg04262419	0.00388442	-1.56335	0.0832279	0.0920354	0.0759637	0.0617849	0.0879693	0.116591	0.137954	0.121399	14	50053794
cg04264442	0.00124832	-1.12781	0.627426	0.651674	0.655916	0.634728	0.646501	?	0.72174	0.728662	7	49205974
cg04264549	0.00602859	-1.20071	0.123378	0.139425	0.129047	0.135437	0.129763	0.159921	0.146603	0.166187	4	128543924
cg04265407	0.00728348	-1.24033	0.0888124	0.11042	0.103261	0.107369	0.111545	0.129087	0.128895	0.130615	20	32078395
cg04266393	0.00777229	-1.37155	0.0641674	0.0694289	0.0658135	0.0783281	0.0652839	0.0950497	0.0830189	0.103914	11	57093011
cg04268254	0.00713861	-1.14716	0.128323	0.11347	0.11402	0.11019	0.109819	0.132343	0.126461	0.136198	5	72599786
cg04271322	0.00568986	-1.11301	0.550601	0.561351	0.550945	0.60408	0.571602	0.624994	0.647572	0.625769	16	87703448
cg04275806	0.00394544	-1.26792	0.087433	0.0867604	0.0889642	0.0895204	0.0961031	0.111046	0.106065	0.123983	1	46999248
cg04275881	0.0051475	-1.2553	0.0744644	0.0891711	0.0790437	0.0853604	0.0891856	0.106327	0.101177	0.106821	1	159796434
cg04275985	0.000980349	-1.43436	0.0531492	0.0678063	0.0812785	0.0723145	0.0738636	0.104612	0.109111	0.0873003	1	150981091
cg04277631	0.00323869	-1.12125	0.635257	0.605796	0.621289	0.661974	0.63344	0.695388	0.709944	0.719975	1	175506182
cg04278444	0.00684251	-1.11257	0.580165	0.598656	0.57672	0.582038	0.535125	0.609507	0.631598	0.670911	15	25456904
cg04279223	0.000673055	-1.51792	0.0783246	0.0888454	0.0740741	0.0701255	0.0887911	0.11465	0.123784	0.125741	1	78443901
cg04286030	0.00631945	-1.28025	0.149156	0.144589	0.153131	0.129664	0.137055	0.192995	0.189084	0.166565	1	2313373
cg04287714	0.00290255	-1.24397	0.0642522	0.0642944	0.0685593	0.0705533	0.0735518	0.087713	0.0799354	0.087402	9	131645039
cg04288999	0.00488705	-1.31048	0.0786739	0.0740538	0.0635883	0.0665771	0.0751747	0.0909966	0.100146	0.090068	2	66667852
cg04297246	0.00317469	-1.43792	0.0756335	0.0843494	0.101539	0.113834	0.101847	0.128418	0.150833	0.133737	4	146653995
cg04297410	0.00739222	-1.21927	0.0674575	0.0727528	0.0719557	0.0613833	0.0668664	0.0776138	0.0866328	0.0843888	20	48429045
cg04299649	0.00862518	-1.24179	0.568767	0.549843	0.544506	0.594766	0.588681	0.651733	0.678438	0.786563	1	55835511
cg04306220	0.00761984	-1.10168	0.636278	0.668358	0.664132	0.657908	0.674461	0.699046	0.729274	0.752859	1	33519235
cg04306229	0.000492478	-1.28887	0.0907682	0.0863047	0.0912743	0.08932	0.0916921	0.119851	0.108562	0.119051	2	120771150
cg04307977	0.00490573	-1.30334	0.058897	0.061291	0.058442	0.0622028	0.0634773	0.0716202	0.0768778	0.0889897	2	207307544
cg04311496	0.00875163	-1.27287	0.0716985	0.0698453	0.0827082	0.0762167	0.0646312	0.0895445	0.0986614	0.0910416	1	67773719
cg04311742	0.00475517	-1.10319	0.538811	0.574516	0.556413	0.554409	0.564896	0.595845	0.612374	0.636156	9	116266223
cg04314092	0.000994811	-1.1021	0.561858	0.570611	0.593964	0.587034	0.590048	0.629216	0.645529	0.647258	5	55216768
cg04318205	0.00833862	-1.25841	0.0755814	0.0657554	0.067326	0.0691321	0.080971	0.0943921	0.087905	0.0888309	17	37309118
cg04322202	0.00240524	-1.35076	0.139799	0.160266	0.158446	0.172351	0.156649	0.209901	0.20123	0.22714	4	66533472
cg04325017	0.00739595	-1.41279	0.0725885	0.066	0.077957	0.0854473	0.0608775	0.102113	0.0968966	0.108606	18	41906386
cg04325130	0.000133252	-1.10455	0.698277	0.717757	0.682828	0.68469	0.693029	0.762463	0.770844	0.768341	13	112507698
cg04326023	0.00489362	-1.1165	0.668127	0.664105	0.666879	0.694486	0.627909	0.729847	0.737527	0.756066	17	8295737
cg04326808	0.00283879	-1.10169	0.597743	0.594644	0.57167	0.591978	0.545645	0.632306	0.630733	0.650961	15	39543043
cg04327703	0.00404122	-1.27102	0.0527607	0.0476481	0.068631	0.0652131	0.0634776	0.0767782	0.0775914	0.0740057	17	56230684
cg04335102	0.00525166	-1.23628	0.0627662	0.0634712	0.0600753	0.0592377	0.067078	0.0827722	0.0725343	0.0765595	3	123680028
cg04336659	0.00564921	-1.35927	0.0622846	0.0773271	0.0678955	0.0774655	0.070129	0.0891657	0.104488	0.0960968	7	27701988
cg04337358	0.00752949	-1.22305	0.517839	0.584651	0.549439	0.496594	0.456567	0.624167	0.62939	0.652594	14	98489522
cg04344069	0.00882217	-1.17331	0.380288	0.407289	0.442073	0.3835	0.401122	0.470281	0.464263	0.484031	12	102456221
cg04352977	0.00227424	-1.37369	?	0.106379	0.0920145	0.102774	0.0940546	0.14363	0.129779	0.136578	16	74069885
cg04359004	0.00655523	-1.1403	0.0779451	0.0760637	0.0771533	0.0821341	0.0847884	0.0927409	0.0880341	0.0919413	20	61427998
cg04359865	0.00912461	-1.2011	0.367852	0.4305	0.446124	0.434461	?	0.519295	0.517822	0.4928	1	158476266
cg04361926	0.000207914	-1.24912	0.25024	0.257833	0.267722	0.279963	0.270522	0.332897	0.35422	0.309904	16	89070185
cg04365123	0.00707717	-1.27906	0.0531806	0.0529702	0.0669187	0.0537076	0.0659814	0.0774682	0.0818061	0.0666215	8	97156397
cg04367680	0.00549831	-1.61941	0.0614478	0.10436	0.128853	0.107517	0.110256	0.191697	0.162432	0.144238	8	74005697
cg04368762	0.000799958	-1.25292	0.0664717	0.0718422	0.0779041	0.0738184	0.0760859	0.0996855	0.0929478	0.0837004	13	30688865
cg04368843	0.00209434	-1.13109	0.602148	0.560578	0.593447	0.584152	0.590001	0.65081	0.652271	0.684512	20	3660815
cg04369903	0.0046914	-1.12174	0.548225	0.561494	0.552964	0.551551	0.56335	0.592098	0.614629	0.659537	2	100863404
cg04370758	0.000865122	-1.15333	0.451429	0.485781	0.464269	0.4419	0.459273	0.524439	0.533099	0.534261	9	131313743
cg04373605	0.00256408	-1.12696	0.627314	0.625606	0.646175	0.682465	0.683254	0.728889	0.741883	0.741087	6	75858385
cg04376719	0.00201384	-1.18017	0.0887858	0.093409	0.103112	0.10485	0.106222	0.117605	0.118239	0.116972	19	1028379
cg04377077	0.00642556	-1.34356	0.151332	0.132701	0.133866	0.140158	0.128497	0.205445	0.168289	0.179487	3	44379424
cg04378603	0.00134772	-1.57837	0.0552083	0.0462123	0.0603377	0.0553701	0.0583164	0.0939297	?	0.0767511	11	65266494
cg04382376	0.00947059	-1.32292	0.0489406	0.0616217	0.0519578	0.0616756	0.0643641	0.0821572	0.0757781	0.071647	13	79178590
cg04383274	0.00323887	-1.2484	0.0934031	0.10528	0.113736	0.103128	0.0969796	0.129948	0.130411	0.124234	21	34863711
cg04386206	0.000226744	-1.20898	0.102626	0.100271	0.101863	0.0995198	0.0973073	0.118956	0.116327	0.127893	3	170303640
cg04387820	0.00307683	-1.32486	0.39651	0.374623	?	0.379338	0.389983	0.466105	0.503455	0.548155	10	18999425
cg04389058	0.000731929	-1.18122	0.573162	0.605577	0.55705	0.579476	0.541202	0.668034	0.641405	0.709364	3	57041402
cg04391637	0.00312437	-1.13886	0.504426	0.50076	0.515944	0.541874	0.532458	0.569433	0.606313	0.599889	12	15375297
cg04393631	0.00630726	-1.15131	0.42458	0.465077	0.478127	0.458919	0.476052	0.52102	0.522847	0.548013	1	30324643
cg04393855	0.00747015	-1.30208	0.0402435	0.0443298	0.0488567	0.0521609	0.0471254	0.059449	0.0578691	0.0647514	1	151042871
cg04394691	0.00316239	-1.35765	0.100857	0.101856	0.0908705	0.0741141	0.096538	0.126574	0.125664	0.125111	6	31466174
cg04394710	0.000310184	-1.16099	0.534317	0.557789	0.538608	0.555918	0.547753	0.615623	0.638471	0.64957	3	68039483
cg04395613	0.000955168	-1.10412	0.666078	0.647924	0.643859	0.664501	0.639588	0.711519	0.70309	0.743333	10	95340738
cg04396242	0.00244344	-1.27092	0.0596316	0.0626787	0.0685755	0.0709402	0.0612565	0.0824606	0.0801653	0.0840655	4	130014437
cg04397164	0.00193429	-1.11018	0.669349	0.702932	0.686024	0.658529	0.672559	0.732929	0.765387	0.757407	4	190213793
cg04398391	0.000429788	-1.32227	0.0794322	0.0851871	0.0935941	0.092942	0.0895231	0.113162	0.118153	0.11883	2	109744523
cg04398474	0.00482003	-1.19129	0.243801	0.26556	0.289278	0.285327	0.260385	0.321655	0.317846	0.323389	15	45996698
cg04404694	0.000158409	-1.19404	0.537916	0.559199	0.532815	0.555088	0.53218	0.642241	0.628856	0.672893	14	37236997
cg04410959	0.00492362	-1.124	0.637392	0.674987	0.639693	0.598373	0.624347	0.721885	0.677841	0.735573	14	89290312
cg04412172	0.00802721	-1.13081	0.620434	0.626311	0.651492	0.640867	0.641404	0.774377	0.692969	0.695005	12	117111591
cg04413863	0.00767837	-1.18475	0.364205	0.411235	0.384089	0.397834	0.359274	0.435467	0.471445	0.454776	20	34713286
cg04414451	0.00820118	-1.11121	0.522802	0.503007	0.519884	0.504907	0.497264	0.572922	0.533015	0.58999	2	108993844
cg04415610	0.00377901	-1.12035	0.573002	0.60004	0.589119	0.554294	0.603388	0.645828	0.646641	0.668518	13	36432082
[truncated: 8,958 more rows]
